# Supplementary material
Source: publisher site journal article supplement (https://www.spandidos-publications.com/1536/downloadSupplementary)
Supplement: Supplementary file 1 [file downloadSupplementary]

## Sheet: string_interactions
Table SV. The results of whole PPI network for Figure 4A
#node1	node2	node1_string_internal_id	node2_string_internal_id	node1_external_id	node2_external_id	neighborhood_on_chromosome	gene_fusion	phylogenetic_cooccurrence	homology	coexpression	experimentally_determined_interaction	database_annotated	automated_textmining	combined_score
PSMB9	PSMB10	4444464	4442129	9606.ENSP00000363993	9606.ENSP00000351314	0	0	0	0.755	0.847	0.963	0.9	0.95	0.999
PSAT1	PHGDH	4444751	4443312	9606.ENSP00000365773	9606.ENSP00000358417	0.185	0	0	0	0.95	0.413	0.9	0.916	0.999
ITGB2	ITGAL	4446737	4441903	9606.ENSP00000380948	9606.ENSP00000349252	0	0	0	0	0.418	0.892	0.9	0.866	0.999
COL4A1	COL4A2	4444632	4442382	9606.ENSP00000364979	9606.ENSP00000353654	0	0	0.433	0.886	0.963	0.886	0.9	0.87	0.999
SUCLG2	SUCLG1	4449031	4446196	9606.ENSP00000419325	9606.ENSP00000377446	0.185	0.486	0.448	0	0.634	0.947	0.9	0.84	0.999
HLA-DMB	HLA-DMA	4448054	4444460	9606.ENSP00000398890	9606.ENSP00000363976	0	0	0	0	0.771	0.826	0.9	0.949	0.999
PRF1	GZMB	4448031	4432950	9606.ENSP00000398568	9606.ENSP00000216341	0	0	0	0	0.78	0.379	0.9	0.951	0.999
C1QC	C1QB	4444427	4438900	9606.ENSP00000363770	9606.ENSP00000313967	0	0	0.426	0.927	0.989	0.454	0.9	0.893	0.999
C1QA	C1QB	4444428	4438900	9606.ENSP00000363773	9606.ENSP00000313967	0	0	0.389	0.86	0.989	0.885	0.9	0.844	0.999
PLAU	SERPINE1	4444017	4433266	9606.ENSP00000361850	9606.ENSP00000223095	0	0	0	0	0.214	0.881	0.9	0.926	0.999
ATP6V1C2	ATP6V1B1	4436011	4433629	9606.ENSP00000272238	9606.ENSP00000234396	0	0	0	0	0.328	0.951	0.9	0.814	0.999
ITGAL	ICAM1	4441903	4435501	9606.ENSP00000349252	9606.ENSP00000264832	0	0	0	0	0.09	0.887	0.9	0.932	0.999
PGF	FLT1	4450339	4436489	9606.ENSP00000451040	9606.ENSP00000282397	0	0	0	0	0	0.877	0.9	0.958	0.999
SERPINE1	PLAT	4433266	4433132	9606.ENSP00000223095	9606.ENSP00000220809	0	0	0	0	0.148	0.881	0.9	0.956	0.999
CYFIP2	NCKAP1L	4450126	4437010	9606.ENSP00000444645	9606.ENSP00000293373	0	0	0	0	0.431	0.948	0.9	0.707	0.999
VEGFA	FLT1	4451310	4436489	9606.ENSP00000478570	9606.ENSP00000282397	0	0	0	0	0.061	0.556	0.9	0.984	0.999
HLA-DRA	CD74	4446403	4432583	9606.ENSP00000378786	9606.ENSP00000009530	0	0	0	0	0.924	0.889	0.9	0.574	0.999
UQCRFS1	UQCRC1	4438219	4432796	9606.ENSP00000306397	9606.ENSP00000203407	0	0	0	0	0.828	0.999	0.9	0.786	0.999
HLA-DQB1	HLA-DQA1	4444478	4440953	9606.ENSP00000364080	9606.ENSP00000339398	0	0	0	0.641	0.546	0.938	0.9	0.944	0.998
RAC2	ARHGDIB	4434085	4433442	9606.ENSP00000249071	9606.ENSP00000228945	0	0	0	0	0.639	0.941	0.9	0.573	0.998
CXCR4	CXCL12	4447439	4446453	9606.ENSP00000386884	9606.ENSP00000379140	0	0	0	0	0	0.457	0.9	0.971	0.998
NPHS1	NPHS2	4445133	4442926	9606.ENSP00000368190	9606.ENSP00000356587	0	0	0	0	0.062	0.42	0.9	0.976	0.998
PLG	SERPINE1	4438461	4433266	9606.ENSP00000308938	9606.ENSP00000223095	0	0	0	0	0.063	0.435	0.9	0.978	0.998
TREM2	TYROBP	4444111	4435115	9606.ENSP00000362205	9606.ENSP00000262629	0	0	0	0	0.535	0.379	0.9	0.925	0.997
BDKRB2	KNG1	4450312	4435537	9606.ENSP00000450482	9606.ENSP00000265023	0	0	0	0	0	0.667	0.9	0.933	0.997
HADH	ECHS1	4451107	4443119	9606.ENSP00000474560	9606.ENSP00000357535	0.072	0.79	0.282	0	0.501	0	0.9	0.724	0.997
ATP6V0D2	ATP6V1B1	4436630	4433629	9606.ENSP00000285393	9606.ENSP00000234396	0.167	0	0	0	0.585	0.76	0.9	0.77	0.997
CASP1	PYCARD	4449658	4434024	9606.ENSP00000433138	9606.ENSP00000247470	0	0	0	0	0.201	0.582	0.9	0.927	0.997
C1QA	C1QC	4444428	4444427	9606.ENSP00000363773	9606.ENSP00000363770	0	0	0.397	0.825	0.954	0.379	0.9	0.763	0.997
MTTP	APOB	4449410	4433584	9606.ENSP00000427679	9606.ENSP00000233242	0	0	0	0	0.546	0.379	0.9	0.927	0.997
ATP6V0A4	ATP6V1B1	4438387	4433629	9606.ENSP00000308122	9606.ENSP00000234396	0.111	0	0	0	0.27	0.622	0.9	0.925	0.997
PRF1	GZMA	4448031	4436124	9606.ENSP00000398568	9606.ENSP00000274306	0	0	0	0	0.729	0	0.9	0.87	0.996
HLA-DMB	HLA-DRA	4448054	4446403	9606.ENSP00000398890	9606.ENSP00000378786	0	0	0	0.663	0.819	0.76	0.9	0.69	0.996
HLA-DPA1	CD74	4447805	4432583	9606.ENSP00000393566	9606.ENSP00000009530	0	0	0	0	0.825	0.47	0.9	0.547	0.995
CD247	CD3D	4442542	4437689	9606.ENSP00000354782	9606.ENSP00000300692	0	0	0	0	0.756	0.379	0.9	0.734	0.995
HADH	ACAA1	4451107	4440473	9606.ENSP00000474560	9606.ENSP00000333664	0.093	0.077	0.258	0	0.156	0.35	0.9	0.89	0.995
CCL5	CXCL10	4451102	4438146	9606.ENSP00000474412	9606.ENSP00000305651	0	0	0	0	0.309	0.226	0.9	0.921	0.995
HLA-DPB1	HLA-DPA1	4448476	4447805	9606.ENSP00000408146	9606.ENSP00000393566	0	0	0	0.68	0.435	0.899	0.9	0.895	0.995
HLA-DQB2	CD74	4447655	4432583	9606.ENSP00000390431	9606.ENSP00000009530	0	0	0	0	0.804	0.41	0.9	0.651	0.995
ATP6V0D2	ATP6V1C2	4436630	4436011	9606.ENSP00000285393	9606.ENSP00000272238	0	0	0	0	0.459	0.721	0.9	0.724	0.995
CLCNKB	BSND	4444605	4443711	9606.ENSP00000364831	9606.ENSP00000360312	0	0	0	0	0.071	0	0.9	0.95	0.995
VAV1	RAC2	4451047	4434085	9606.ENSP00000472929	9606.ENSP00000249071	0	0	0	0	0.353	0.73	0.9	0.701	0.994
COL5A2	COL1A1	4444466	4433346	9606.ENSP00000364000	9606.ENSP00000225964	0	0	0.444	0.949	0.945	0	0.9	0.76	0.994
HLA-DQB1	CD74	4444478	4432583	9606.ENSP00000364080	9606.ENSP00000009530	0	0	0	0	0.706	0.72	0.9	0.426	0.994
HLA-DRA	HLA-DMA	4446403	4444460	9606.ENSP00000378786	9606.ENSP00000363976	0	0	0	0.713	0.479	0.87	0.9	0.715	0.994
CD27	CD70	4435711	4433950	9606.ENSP00000266557	9606.ENSP00000245903	0	0	0	0	0	0.379	0.9	0.922	0.994
PROC	PROCR	4433614	4432992	9606.ENSP00000234071	9606.ENSP00000216968	0	0	0	0	0	0.87	0.9	0.619	0.994
LY86	LY96	4445292	4436604	9606.ENSP00000369286	9606.ENSP00000284818	0	0	0	0	0.231	0.379	0.9	0.891	0.994
ASPM	NCAPG	4442873	4434176	9606.ENSP00000356379	9606.ENSP00000251496	0	0	0	0	0.991	0	0	0.293	0.993
DOCK2	RAC2	4434518	4434085	9606.ENSP00000256935	9606.ENSP00000249071	0	0	0	0	0.566	0.606	0.9	0.638	0.993
HLA-DQA1	CD74	4440953	4432583	9606.ENSP00000339398	9606.ENSP00000009530	0	0	0	0	0.598	0.701	0.9	0.5	0.993
BMP7	SOSTDC1	4446466	4438091	9606.ENSP00000379204	9606.ENSP00000304930	0	0	0	0	0.069	0.379	0.9	0.904	0.993
VEGFA	EGF	4451310	4435570	9606.ENSP00000478570	9606.ENSP00000265171	0	0	0	0	0	0	0.9	0.937	0.993
CHGB	SCG2	4445138	4438023	9606.ENSP00000368244	9606.ENSP00000304133	0	0	0	0	0.296	0	0.9	0.898	0.992
CASP1	AIM2	4449658	4443042	9606.ENSP00000433138	9606.ENSP00000357112	0	0	0	0	0.093	0.294	0.9	0.891	0.992
PTHLH	PTH1R	4450000	4439492	9606.ENSP00000441765	9606.ENSP00000321999	0	0	0	0	0	0.379	0.9	0.885	0.992
GRHPR	AGXT	4438861	4437874	9606.ENSP00000313432	9606.ENSP00000302620	0.295	0.157	0	0	0.188	0	0.9	0.869	0.992
CDKN1C	CCND1	4448705	4433391	9606.ENSP00000413720	9606.ENSP00000227507	0	0	0	0	0.063	0.81	0.9	0.64	0.992
PLG	HRG	4438461	4433552	9606.ENSP00000308938	9606.ENSP00000232003	0	0	0	0	0.428	0.379	0.9	0.817	0.992
HOGA1	GRHPR	4443592	4438861	9606.ENSP00000359680	9606.ENSP00000313432	0.219	0	0	0	0.152	0	0.9	0.883	0.991
CCL5	CXCL9	4451102	4442567	9606.ENSP00000474412	9606.ENSP00000354901	0	0	0	0	0.266	0.221	0.9	0.861	0.991
CD2	CD247	4443326	4442542	9606.ENSP00000358490	9606.ENSP00000354782	0	0	0	0	0.776	0.379	0.9	0.448	0.991
CD40	BIRC3	4443911	4435265	9606.ENSP00000361359	9606.ENSP00000263464	0	0	0	0	0.107	0.811	0.9	0.531	0.991
ATP6V0A4	ATP6V0D2	4438387	4436630	9606.ENSP00000308122	9606.ENSP00000285393	0.111	0	0	0	0.188	0.698	0.9	0.689	0.991
NEDD4L	SCNN1G	4446996	4437627	9606.ENSP00000383199	9606.ENSP00000300061	0	0	0	0	0	0.454	0.9	0.849	0.991
HADH	ACAT1	4451107	4435651	9606.ENSP00000474560	9606.ENSP00000265838	0.093	0.013	0.264	0	0.463	0.35	0.9	0.715	0.991
NEDD4L	SCNN1A	4446996	4442340	9606.ENSP00000383199	9606.ENSP00000353292	0	0	0	0	0	0.472	0.9	0.844	0.991
GLDC	SHMT2	4445533	4440475	9606.ENSP00000370737	9606.ENSP00000333667	0.219	0.133	0	0	0.324	0	0.9	0.821	0.99
FN1	ALB	4441661	4437206	9606.ENSP00000346839	9606.ENSP00000295897	0	0	0	0	0.077	0.104	0.9	0.899	0.99
ATP6V1G3	ATP6V1C2	4436410	4436011	9606.ENSP00000281087	9606.ENSP00000272238	0	0	0	0	0.147	0.559	0.9	0.785	0.99
FN1	ITGA5	4441661	4437011	9606.ENSP00000346839	9606.ENSP00000293379	0	0	0	0	0.153	0.379	0.9	0.841	0.99
ATP6V0D2	ATP6V1G3	4436630	4436410	9606.ENSP00000285393	9606.ENSP00000281087	0	0	0	0	0.189	0.644	0.9	0.694	0.989
NUSAP1	NCAPG	4450429	4434176	9606.ENSP00000453403	9606.ENSP00000251496	0	0	0	0	0.981	0	0	0.472	0.989
ATP6V1G3	ATP6V1B1	4436410	4433629	9606.ENSP00000281087	9606.ENSP00000234396	0	0	0	0	0.113	0.56	0.9	0.762	0.989
HLA-DMA	CD74	4444460	4432583	9606.ENSP00000363976	9606.ENSP00000009530	0	0	0	0	0.525	0.472	0.9	0.641	0.989
ITGB2	ICAM1	4446737	4435501	9606.ENSP00000380948	9606.ENSP00000264832	0	0	0	0	0.113	0.379	0.9	0.829	0.989
HAO2	AGXT	4451782	4437874	9606.ENSP00000483507	9606.ENSP00000302620	0	0	0	0	0.685	0.267	0.9	0.582	0.989
HLA-DQB2	HLA-DQA1	4447655	4440953	9606.ENSP00000390431	9606.ENSP00000339398	0	0	0	0.672	0.552	0.736	0.9	0.614	0.989
CSF1R	SPI1	4436666	4433383	9606.ENSP00000286301	9606.ENSP00000227163	0	0	0	0	0.71	0	0.8	0.812	0.988
VEGFA	FN1	4451310	4441661	9606.ENSP00000478570	9606.ENSP00000346839	0	0	0	0	0.076	0	0.9	0.88	0.988
PECAM1	CDH5	4450567	4441389	9606.ENSP00000457421	9606.ENSP00000344115	0	0	0	0	0.143	0	0.8	0.938	0.988
AIM2	PYCARD	4443042	4434024	9606.ENSP00000357112	9606.ENSP00000247470	0	0	0	0	0.061	0.447	0.9	0.797	0.988
CXCL9	CXCL10	4442567	4438146	9606.ENSP00000354901	9606.ENSP00000305651	0	0	0	0.862	0.848	0.221	0.9	0.951	0.988
VEGFA	CDH5	4451310	4441389	9606.ENSP00000478570	9606.ENSP00000344115	0	0	0	0	0.061	0	0.9	0.882	0.988
FN1	EGF	4441661	4435570	9606.ENSP00000346839	9606.ENSP00000265171	0	0	0	0	0	0	0.9	0.888	0.988
OAT	ARG2	4443204	4434948	9606.ENSP00000357838	9606.ENSP00000261783	0.185	0	0	0	0.343	0.132	0.9	0.786	0.988
TOP2A	NCAPG	4448614	4434176	9606.ENSP00000411532	9606.ENSP00000251496	0	0	0	0	0.967	0.085	0	0.644	0.988
CYBB	RAC2	4445083	4434085	9606.ENSP00000367851	9606.ENSP00000249071	0	0	0	0	0.263	0.384	0.9	0.753	0.987
BMPR1B	BMP7	4448203	4446466	9606.ENSP00000401907	9606.ENSP00000379204	0	0	0	0	0	0.541	0.9	0.758	0.987
HLA-G	HLA-F	4448666	4434738	9606.ENSP00000412927	9606.ENSP00000259951	0	0	0	0.978	0.076	0.869	0.9	0.794	0.987
TNNT2	TNNC1	4433670	4433570	9606.ENSP00000236918	9606.ENSP00000232975	0	0	0	0	0.356	0.524	0.9	0.636	0.987
CDKN1C	CCND2	4448705	4434845	9606.ENSP00000413720	9606.ENSP00000261254	0	0	0	0	0.061	0.686	0.9	0.599	0.986
PC	PCK2	4446208	4432982	9606.ENSP00000377532	9606.ENSP00000216780	0	0	0	0	0.064	0	0.9	0.869	0.986
ATP6V0A4	ATP6V1C2	4438387	4436011	9606.ENSP00000308122	9606.ENSP00000272238	0	0	0	0	0.148	0.42	0.9	0.763	0.986
VEGFA	ALB	4451310	4437206	9606.ENSP00000478570	9606.ENSP00000295897	0	0	0	0	0.062	0	0.9	0.871	0.986
ALB	APOB	4437206	4433584	9606.ENSP00000295897	9606.ENSP00000233242	0	0	0	0	0.564	0	0.9	0.709	0.986
VEGFA	VWF	4451310	4434871	9606.ENSP00000478570	9606.ENSP00000261405	0	0	0	0	0	0	0.9	0.87	0.986
SPARC	COL1A1	4433520	4433346	9606.ENSP00000231061	9606.ENSP00000225964	0	0	0	0	0.94	0.456	0	0.627	0.986
PSMB9	TAP1	4444464	4441602	9606.ENSP00000363993	9606.ENSP00000346206	0	0	0	0	0.917	0.348	0	0.752	0.985
HLA-DMB	CD74	4448054	4432583	9606.ENSP00000398890	9606.ENSP00000009530	0	0	0	0	0.631	0.379	0.9	0.445	0.985
VCAN	DCN	4435552	4432629	9606.ENSP00000265077	9606.ENSP00000052754	0	0	0	0	0.063	0.085	0.9	0.852	0.985
HAO2	PIPOX	4451782	4439149	9606.ENSP00000483507	9606.ENSP00000317721	0	0	0	0	0.515	0	0.9	0.721	0.985
KNG1	F12	4435537	4434311	9606.ENSP00000265023	9606.ENSP00000253496	0	0	0	0	0.099	0.305	0.9	0.791	0.985
SHMT2	TYMS	4440475	4439011	9606.ENSP00000333667	9606.ENSP00000315644	0.174	0	0	0	0.2	0	0.9	0.812	0.985
FN1	PLG	4441661	4438461	9606.ENSP00000346839	9606.ENSP00000308938	0	0	0	0	0	0.294	0.9	0.8	0.984
CTSS	CD74	4443237	4432583	9606.ENSP00000357981	9606.ENSP00000009530	0	0	0	0	0.621	0.161	0.9	0.571	0.984
NUSAP1	TOP2A	4450429	4448614	9606.ENSP00000453403	9606.ENSP00000411532	0	0	0	0	0.966	0	0	0.562	0.984
ALDH4A1	PRODH2	4444540	4437726	9606.ENSP00000364490	9606.ENSP00000301175	0.058	0	0	0	0.292	0.157	0.9	0.76	0.984
AGXT	AGXT2	4437874	4433532	9606.ENSP00000302620	9606.ENSP00000231420	0.166	0	0	0	0.208	0	0.9	0.797	0.984
IGFBP3	FN1	4445494	4441661	9606.ENSP00000370473	9606.ENSP00000346839	0	0	0	0	0.303	0.379	0.9	0.685	0.984
ACADSB	ECHS1	4443211	4443119	9606.ENSP00000357873	9606.ENSP00000357535	0.048	0	0.3	0	0.352	0.085	0.9	0.663	0.983
PCCB	BCKDHB	4449005	4439197	9606.ENSP00000419027	9606.ENSP00000318351	0.078	0	0	0	0.651	0	0.9	0.55	0.983
CXCL12	CCL20	4446453	4442174	9606.ENSP00000379140	9606.ENSP00000351671	0	0	0	0	0	0.546	0.9	0.674	0.983
PLG	KNG1	4438461	4435537	9606.ENSP00000308938	9606.ENSP00000265023	0	0	0	0	0.262	0.379	0.9	0.677	0.983
ITGB2	ITGA4	4446737	4446627	9606.ENSP00000380948	9606.ENSP00000380227	0	0	0	0	0.154	0.382	0.9	0.724	0.983
PLG	VWF	4438461	4434871	9606.ENSP00000308938	9606.ENSP00000261405	0	0	0	0	0	0	0.9	0.845	0.983
PIPOX	AGXT	4439149	4437874	9606.ENSP00000317721	9606.ENSP00000302620	0.13	0	0	0	0.588	0	0.9	0.595	0.983
SERPINA1	ALB	4448813	4437206	9606.ENSP00000416066	9606.ENSP00000295897	0	0	0	0	0.292	0	0.9	0.789	0.983
ALDH4A1	OAT	4444540	4443204	9606.ENSP00000364490	9606.ENSP00000357838	0.075	0	0	0	0.093	0	0.9	0.824	0.983
NEDD4L	SCNN1B	4446996	4441549	9606.ENSP00000383199	9606.ENSP00000345751	0	0	0	0	0	0.472	0.9	0.709	0.983
CCL5	CXCR4	4451102	4447439	9606.ENSP00000474412	9606.ENSP00000386884	0	0	0	0	0.061	0.05	0.9	0.832	0.983
MYL3	TNNT2	4446468	4433670	9606.ENSP00000379210	9606.ENSP00000236918	0	0	0	0	0.335	0.16	0.9	0.742	0.983
VEGFA	SERPINE1	4451310	4433266	9606.ENSP00000478570	9606.ENSP00000223095	0	0	0	0	0.076	0	0.9	0.821	0.982
FN1	SPARC	4441661	4433520	9606.ENSP00000346839	9606.ENSP00000231061	0	0	0	0	0.279	0.342	0.9	0.675	0.982
HMGCS2	ACAT1	4443311	4435651	9606.ENSP00000358414	9606.ENSP00000265838	0.093	0	0	0	0.19	0.37	0.9	0.677	0.982
ATP6V0A4	ATP6V1G3	4438387	4436410	9606.ENSP00000308122	9606.ENSP00000281087	0	0	0	0	0.065	0.402	0.9	0.719	0.982
HLA-DMB	HLA-DPA1	4448054	4447805	9606.ENSP00000398890	9606.ENSP00000393566	0	0	0	0.676	0.701	0.268	0.9	0.663	0.981
SERPINA1	CP	4448813	4435459	9606.ENSP00000416066	9606.ENSP00000264613	0	0	0	0	0.118	0	0.9	0.801	0.981
HOGA1	AGXT	4443592	4437874	9606.ENSP00000359680	9606.ENSP00000302620	0.078	0	0	0	0.284	0	0.9	0.748	0.981
CCL5	CXCL12	4451102	4446453	9606.ENSP00000474412	9606.ENSP00000379140	0	0	0	0	0	0.201	0.9	0.791	0.981
TST	CTH	4447278	4443637	9606.ENSP00000385828	9606.ENSP00000359976	0.219	0.128	0	0	0.064	0	0.9	0.752	0.981
CAV1	CAV2	4440933	4433246	9606.ENSP00000339191	9606.ENSP00000222693	0	0	0	0.858	0.819	0.454	0.8	0.98	0.981
FN1	VWF	4441661	4434871	9606.ENSP00000346839	9606.ENSP00000261405	0	0	0	0	0.061	0	0.9	0.807	0.98
ALB	EGF	4437206	4435570	9606.ENSP00000295897	9606.ENSP00000265171	0	0	0	0	0	0	0.9	0.808	0.98
PC	ACLY	4446208	4434323	9606.ENSP00000377532	9606.ENSP00000253792	0.043	0	0	0	0.086	0	0.9	0.801	0.98
ALB	CP	4437206	4435459	9606.ENSP00000295897	9606.ENSP00000264613	0	0	0	0	0.171	0	0.9	0.788	0.98
NUSAP1	ASPM	4450429	4442873	9606.ENSP00000453403	9606.ENSP00000356379	0	0	0	0	0.975	0	0	0.22	0.98
TLR3	BIRC3	4437339	4435265	9606.ENSP00000296795	9606.ENSP00000263464	0	0	0	0	0.049	0.754	0.9	0.282	0.98
MUC13	MUC15	4451907	4448848	9606.ENSP00000485028	9606.ENSP00000416753	0	0	0	0	0	0	0.9	0.8	0.979
FN1	SERPINE1	4441661	4433266	9606.ENSP00000346839	9606.ENSP00000223095	0	0	0	0	0.295	0	0.9	0.735	0.979
CCL5	CCL20	4451102	4442174	9606.ENSP00000474412	9606.ENSP00000351671	0	0	0	0	0.133	0.219	0.9	0.738	0.979
ALB	SERPINE1	4437206	4433266	9606.ENSP00000295897	9606.ENSP00000223095	0	0	0	0	0.077	0	0.9	0.795	0.979
PC	PCK1	4446208	4439313	9606.ENSP00000377532	9606.ENSP00000319814	0	0	0	0	0.064	0	0.9	0.794	0.979
FBLN5	LOX	4441481	4433517	9606.ENSP00000345008	9606.ENSP00000231004	0	0	0	0	0.167	0.363	0.9	0.658	0.979
BTK	VAV1	4451790	4451047	9606.ENSP00000483570	9606.ENSP00000472929	0	0	0	0.547	0.451	0.467	0.9	0.799	0.979
TRIM22	GBP1	4445296	4443543	9606.ENSP00000369299	9606.ENSP00000359504	0	0	0	0	0.711	0	0.9	0.33	0.978
PLG	ALB	4438461	4437206	9606.ENSP00000308938	9606.ENSP00000295897	0	0	0	0	0.257	0	0.9	0.737	0.978
PFKP	ALDOC	4445499	4433361	9606.ENSP00000370517	9606.ENSP00000226253	0	0	0	0	0.215	0	0.9	0.747	0.978
HLA-DQB1	HLA-DMA	4444478	4444460	9606.ENSP00000364080	9606.ENSP00000363976	0	0	0	0	0.337	0.195	0.9	0.641	0.978
EGF	SERPINE1	4435570	4433266	9606.ENSP00000265171	9606.ENSP00000223095	0	0	0	0	0	0	0.9	0.798	0.978
VWF	SERPINE1	4434871	4433266	9606.ENSP00000261405	9606.ENSP00000223095	0	0	0	0	0	0	0.9	0.796	0.978
ACAT1	OXCT1	4435651	4432761	9606.ENSP00000265838	9606.ENSP00000196371	0.093	0.053	0	0	0.081	0	0.9	0.767	0.978
SHMT2	FTCD	4440475	4436927	9606.ENSP00000333667	9606.ENSP00000291670	0.163	0	0	0	0.062	0	0.9	0.744	0.977
HLA-DPB1	HLA-DMA	4448476	4444460	9606.ENSP00000408146	9606.ENSP00000363976	0	0	0	0	0.244	0.195	0.9	0.674	0.977
NDUFA4	UQCRFS1	4440978	4438219	9606.ENSP00000339720	9606.ENSP00000306397	0	0	0	0	0.557	0.187	0.9	0.439	0.977
ITGB2	CD53	4446737	4435973	9606.ENSP00000380948	9606.ENSP00000271324	0	0	0	0	0.671	0	0.9	0.348	0.976
NUSAP1	CEP55	4450429	4443758	9606.ENSP00000453403	9606.ENSP00000360540	0	0	0	0	0.957	0	0	0.474	0.976
ITGA4	FN1	4446627	4441661	9606.ENSP00000380227	9606.ENSP00000346839	0	0	0	0	0.051	0.379	0.9	0.642	0.976
CXCL12	CXCL10	4446453	4438146	9606.ENSP00000379140	9606.ENSP00000305651	0	0	0	0	0	0.221	0.9	0.725	0.976
ACADM	ACAA1	4443625	4440473	9606.ENSP00000359871	9606.ENSP00000333664	0.055	0	0	0	0.162	0	0.9	0.73	0.975
HLA-DPB1	CD74	4448476	4432583	9606.ENSP00000408146	9606.ENSP00000009530	0	0	0	0	0.35	0.411	0.9	0.424	0.975
CCL20	CXCL10	4442174	4438146	9606.ENSP00000351671	9606.ENSP00000305651	0	0	0	0	0.143	0	0.9	0.733	0.975
HADH	ACADM	4451107	4443625	9606.ENSP00000474560	9606.ENSP00000359871	0.071	0	0.374	0	0.298	0	0.8	0.743	0.975
PFKP	ALDOB	4445499	4444463	9606.ENSP00000370517	9606.ENSP00000363988	0	0	0	0	0.188	0	0.9	0.717	0.975
IGFBP3	PLG	4445494	4438461	9606.ENSP00000370473	9606.ENSP00000308938	0	0	0	0	0	0.379	0.9	0.64	0.975
EGF	TIMP1	4435570	4433052	9606.ENSP00000265171	9606.ENSP00000218388	0	0	0	0	0	0	0.9	0.75	0.974
SERPINE1	TIMP1	4433266	4433052	9606.ENSP00000223095	9606.ENSP00000218388	0	0	0	0	0.174	0	0.9	0.712	0.974
APOC1	APOB	4450772	4433584	9606.ENSP00000465356	9606.ENSP00000233242	0	0	0	0	0.098	0	0.9	0.725	0.973
CD8A	CD3D	4447395	4437689	9606.ENSP00000386559	9606.ENSP00000300692	0	0	0	0	0.383	0.379	0.9	0.389	0.973
VEGFA	KNG1	4451310	4435537	9606.ENSP00000478570	9606.ENSP00000265023	0	0	0	0	0	0	0.9	0.743	0.973
ACAA1	PHYH	4440473	4435183	9606.ENSP00000333664	9606.ENSP00000263038	0	0	0	0	0.063	0	0.9	0.735	0.973
ANK2	SCN4B	4441946	4439529	9606.ENSP00000349588	9606.ENSP00000322460	0	0	0	0	0.192	0	0.9	0.703	0.973
TOP2A	ASPM	4448614	4442873	9606.ENSP00000411532	9606.ENSP00000356379	0	0	0	0	0.967	0	0	0.234	0.973
APOB	APOH	4433584	4432817	9606.ENSP00000233242	9606.ENSP00000205948	0	0	0	0	0.812	0	0.72	0.541	0.973
ALB	VWF	4437206	4434871	9606.ENSP00000295897	9606.ENSP00000261405	0	0	0	0	0	0	0.9	0.746	0.973
ALOX5	PTGS1	4444382	4442503	9606.ENSP00000363512	9606.ENSP00000354612	0	0	0	0	0.095	0	0.9	0.728	0.973
VEGFA	TIMP1	4451310	4433052	9606.ENSP00000478570	9606.ENSP00000218388	0	0	0	0	0.084	0	0.9	0.731	0.973
CXCL12	CXCL9	4446453	4442567	9606.ENSP00000379140	9606.ENSP00000354901	0	0	0	0	0.065	0.221	0.9	0.681	0.973
ITGB2	FCER1G	4446737	4436828	9606.ENSP00000380948	9606.ENSP00000289902	0	0	0	0	0.662	0	0.9	0.291	0.973
CAV1	EGF	4440933	4435570	9606.ENSP00000339191	9606.ENSP00000265171	0	0	0	0	0	0	0.9	0.746	0.973
S100A10	PLG	4443194	4438461	9606.ENSP00000357801	9606.ENSP00000308938	0	0	0	0	0	0.379	0.9	0.599	0.972
LCP1	FSCN1	4446831	4445678	9606.ENSP00000381581	9606.ENSP00000371798	0	0	0	0	0.066	0	0.9	0.732	0.972
FN1	TIMP1	4441661	4433052	9606.ENSP00000346839	9606.ENSP00000218388	0	0	0	0	0.11	0	0.9	0.712	0.972
SERPINA1	PLG	4448813	4438461	9606.ENSP00000416066	9606.ENSP00000308938	0	0	0	0	0.177	0.129	0.9	0.656	0.972
ATP6V0E2	ATP6V0D2	4448619	4436630	9606.ENSP00000411672	9606.ENSP00000285393	0	0	0	0	0.114	0.293	0.9	0.617	0.972
HMGCS2	ACAA1	4443311	4440473	9606.ENSP00000358414	9606.ENSP00000333664	0.093	0	0	0	0.143	0.37	0.9	0.517	0.972
ALB	C3	4437206	4433951	9606.ENSP00000295897	9606.ENSP00000245907	0	0	0	0	0.143	0	0.9	0.704	0.972
CXCL9	CCL20	4442567	4442174	9606.ENSP00000354901	9606.ENSP00000351671	0	0	0	0	0.097	0	0.9	0.705	0.971
RUNX3	CCND1	4446960	4433391	9606.ENSP00000382800	9606.ENSP00000227507	0	0	0	0	0	0.305	0.9	0.624	0.971
HADH	ALDH6A1	4451107	4450308	9606.ENSP00000474560	9606.ENSP00000450436	0	0.006	0	0	0.667	0	0.9	0.206	0.971
KNG1	HRG	4435537	4433552	9606.ENSP00000265023	9606.ENSP00000232003	0	0	0	0	0.257	0	0.9	0.641	0.971
EDN1	KNG1	4445200	4435537	9606.ENSP00000368683	9606.ENSP00000265023	0	0	0	0	0	0	0.9	0.731	0.971
ALB	KNG1	4437206	4435537	9606.ENSP00000295897	9606.ENSP00000265023	0	0	0	0	0.202	0	0.9	0.67	0.971
CD247	IL2RB	4442542	4432931	9606.ENSP00000354782	9606.ENSP00000216223	0	0	0	0	0.638	0	0.9	0.267	0.971
EGF	KNG1	4435570	4435537	9606.ENSP00000265171	9606.ENSP00000265023	0	0	0	0	0	0	0.9	0.714	0.97
FN1	VCAN	4441661	4435552	9606.ENSP00000346839	9606.ENSP00000265077	0	0	0	0	0.097	0	0.9	0.694	0.97
FECH	HMOX1	4445732	4432912	9606.ENSP00000372326	9606.ENSP00000216117	0	0	0	0	0	0	0.9	0.708	0.969
MUC13	MUC1	4451907	4451890	9606.ENSP00000485028	9606.ENSP00000484824	0	0	0	0	0.071	0	0.9	0.703	0.969
PLG	TIMP1	4438461	4433052	9606.ENSP00000308938	9606.ENSP00000218388	0	0	0	0	0	0	0.9	0.708	0.969
COL4A1	COL5A2	4444632	4444466	9606.ENSP00000364979	9606.ENSP00000364000	0	0	0.43	0.699	0.581	0	0.9	0.68	0.969
MUC1	MUC15	4451890	4448848	9606.ENSP00000484824	9606.ENSP00000416753	0	0	0	0	0	0	0.9	0.711	0.969
KNG1	SERPINE1	4435537	4433266	9606.ENSP00000265023	9606.ENSP00000223095	0	0	0	0	0.055	0	0.9	0.703	0.969
ACADM	ECHS1	4443625	4443119	9606.ENSP00000359871	9606.ENSP00000357535	0.048	0	0.224	0	0.189	0.085	0.9	0.551	0.969
SERPINA5	PROC	4440432	4433614	9606.ENSP00000333203	9606.ENSP00000234071	0	0	0	0	0.177	0.435	0.9	0.416	0.969
HLA-DQB2	HLA-DMA	4447655	4444460	9606.ENSP00000390431	9606.ENSP00000363976	0	0	0	0	0.309	0.195	0.9	0.52	0.969
COL4A1	COL1A1	4444632	4433346	9606.ENSP00000364979	9606.ENSP00000225964	0	0	0.407	0.706	0.575	0	0.9	0.758	0.969
CXCR4	EDN1	4447439	4445200	9606.ENSP00000386884	9606.ENSP00000368683	0	0	0	0	0	0.157	0.9	0.667	0.969
HLA-G	HLA-B	4448666	4448060	9606.ENSP00000412927	9606.ENSP00000399168	0	0	0	0.98	0.076	0.689	0.9	0.721	0.969
HLA-G	HLA-E	4448666	4444757	9606.ENSP00000412927	9606.ENSP00000365817	0	0	0	0.978	0.073	0.692	0.9	0.913	0.969
HLA-E	HLA-F	4444757	4434738	9606.ENSP00000365817	9606.ENSP00000259951	0	0	0	0.972	0.141	0.663	0.9	0.792	0.969
VEGFA	PLG	4451310	4438461	9606.ENSP00000478570	9606.ENSP00000308938	0	0	0	0	0	0	0.9	0.708	0.969
LDHA	LDHD	4450150	4437622	9606.ENSP00000445175	9606.ENSP00000300051	0.053	0	0	0	0.062	0	0.9	0.701	0.969
CYP8B1	HSD3B7	4439232	4437430	9606.ENSP00000318867	9606.ENSP00000297679	0	0	0	0	0.078	0.268	0.9	0.594	0.968
C7	C5	4439494	4433289	9606.ENSP00000322061	9606.ENSP00000223642	0	0	0	0	0.062	0.379	0.9	0.518	0.968
DDC	MAOA	4448281	4441072	9606.ENSP00000403644	9606.ENSP00000340684	0	0	0	0	0.087	0	0.9	0.682	0.968
LUM	COL1A1	4435725	4433346	9606.ENSP00000266718	9606.ENSP00000225964	0	0	0	0	0.764	0.082	0.72	0.535	0.968
VEGFA	SPARC	4451310	4433520	9606.ENSP00000478570	9606.ENSP00000231061	0	0	0	0	0	0.379	0.9	0.537	0.968
FBP1	ALDOB	4448472	4444463	9606.ENSP00000408025	9606.ENSP00000363988	0	0	0	0	0.181	0	0.9	0.634	0.967
EPHX2	CYP2J2	4449539	4443694	9606.ENSP00000430269	9606.ENSP00000360247	0.056	0	0	0	0.078	0.081	0.9	0.657	0.967
SCNN1G	WNK4	4437627	4434005	9606.ENSP00000300061	9606.ENSP00000246914	0	0	0	0	0	0	0.9	0.683	0.967
UPP2	TYMP	4451092	4446438	9606.ENSP00000474090	9606.ENSP00000379038	0	0	0	0	0.064	0	0.9	0.68	0.967
HLA-B	HLA-E	4448060	4444757	9606.ENSP00000399168	9606.ENSP00000365817	0	0	0	0.978	0.348	0.514	0.9	0.733	0.966
COL1A1	DCN	4433346	4432629	9606.ENSP00000225964	9606.ENSP00000052754	0	0	0	0	0.868	0.405	0	0.61	0.966
ACADSB	ACAA1	4443211	4440473	9606.ENSP00000357873	9606.ENSP00000333664	0.055	0	0	0	0.17	0	0.9	0.623	0.966
ATP6V0E2	ATP6V0A4	4448619	4438387	9606.ENSP00000411672	9606.ENSP00000308122	0	0	0	0	0	0.408	0.9	0.475	0.966
HLA-DRA	HLA-DQB1	4446403	4444478	9606.ENSP00000378786	9606.ENSP00000364080	0	0	0	0.641	0.388	0.297	0.9	0.798	0.966
FN1	C3	4441661	4433951	9606.ENSP00000346839	9606.ENSP00000245907	0	0	0	0	0.095	0.264	0.9	0.558	0.966
CXCR4	CXCL10	4447439	4438146	9606.ENSP00000386884	9606.ENSP00000305651	0	0	0	0	0	0	0.9	0.669	0.965
ENTPD1	ENPP1	4443695	4442442	9606.ENSP00000360250	9606.ENSP00000354238	0	0	0	0	0.064	0.05	0.9	0.661	0.965
LDHA	PC	4450150	4446208	9606.ENSP00000445175	9606.ENSP00000377532	0.051	0	0	0	0.063	0.132	0.9	0.619	0.965
EGF	VWF	4435570	4434871	9606.ENSP00000265171	9606.ENSP00000261405	0	0	0	0	0.061	0	0.9	0.666	0.965
ITGB2	CYBB	4446737	4445083	9606.ENSP00000380948	9606.ENSP00000367851	0	0	0	0	0.577	0	0.9	0.25	0.965
HMGCS2	OXCT1	4443311	4432761	9606.ENSP00000358414	9606.ENSP00000196371	0.071	0	0	0	0.061	0	0.9	0.656	0.965
CD8A	IL2RB	4447395	4432931	9606.ENSP00000386559	9606.ENSP00000216223	0	0	0	0	0.322	0	0.9	0.527	0.965
COX4I2	UQCRFS1	4444672	4438219	9606.ENSP00000365243	9606.ENSP00000306397	0	0	0	0	0.455	0.736	0.54	0.535	0.965
TOP2A	MELK	4448614	4437455	9606.ENSP00000411532	9606.ENSP00000298048	0	0	0	0	0.935	0	0	0.474	0.964
BTK	FCER1G	4451790	4436828	9606.ENSP00000483570	9606.ENSP00000289902	0	0	0	0	0.215	0.435	0.9	0.284	0.964
ENO2	PGAM2	4449816	4437386	9606.ENSP00000437402	9606.ENSP00000297283	0.073	0	0	0	0.376	0.09	0.9	0.429	0.964
CSF1R	TYROBP	4436666	4435115	9606.ENSP00000286301	9606.ENSP00000262629	0	0	0	0	0.925	0	0	0.539	0.964
GLDC	AGXT2	4445533	4433532	9606.ENSP00000370737	9606.ENSP00000231420	0.078	0	0	0	0.081	0	0.9	0.634	0.964
SHMT2	AGXT	4440475	4437874	9606.ENSP00000333667	9606.ENSP00000302620	0.184	0	0	0	0.063	0	0.9	0.592	0.964
HLA-DPA1	HLA-DQB1	4447805	4444478	9606.ENSP00000393566	9606.ENSP00000364080	0	0	0	0.653	0.353	0.297	0.9	0.822	0.964
PLG	EGF	4438461	4435570	9606.ENSP00000308938	9606.ENSP00000265171	0	0	0	0	0	0	0.9	0.661	0.964
HLA-B	HLA-DMA	4448060	4444460	9606.ENSP00000399168	9606.ENSP00000363976	0	0	0	0	0.153	0	0.9	0.607	0.963
TLR7	CTSS	4445433	4443237	9606.ENSP00000370034	9606.ENSP00000357981	0	0	0	0	0.554	0	0.9	0.25	0.963
TOP2A	CEP55	4448614	4443758	9606.ENSP00000411532	9606.ENSP00000360540	0	0	0	0	0.937	0	0	0.439	0.963
DTL	DDB2	4442781	4434523	9606.ENSP00000355958	9606.ENSP00000256996	0	0	0	0	0.061	0	0.9	0.644	0.963
MYL3	MYH10	4446468	4442375	9606.ENSP00000379210	9606.ENSP00000353590	0	0	0	0	0.063	0.578	0.72	0.712	0.963
CP	C3	4435459	4433951	9606.ENSP00000264613	9606.ENSP00000245907	0	0	0	0	0.2	0	0.9	0.581	0.963
ARHGAP9	RAC2	4446186	4434085	9606.ENSP00000377380	9606.ENSP00000249071	0	0	0	0	0.24	0.186	0.9	0.479	0.963
SERPINA1	C3	4448813	4433951	9606.ENSP00000416066	9606.ENSP00000245907	0	0	0	0	0.16	0	0.9	0.595	0.963
PCK1	PPARGC1A	4439313	4435507	9606.ENSP00000319814	9606.ENSP00000264867	0	0	0	0	0.078	0	0.9	0.621	0.962
ALDH6A1	PCCB	4450308	4449005	9606.ENSP00000450436	9606.ENSP00000419027	0	0	0	0	0.308	0	0.9	0.502	0.962
COL5A2	PLOD2	4444466	4436514	9606.ENSP00000364000	9606.ENSP00000282903	0	0	0	0	0.179	0.17	0.9	0.519	0.962
PCCB	PC	4449005	4446208	9606.ENSP00000419027	9606.ENSP00000377532	0.217	0.046	0	0	0.063	0	0.9	0.541	0.962
PLOD2	COL1A1	4436514	4433346	9606.ENSP00000282903	9606.ENSP00000225964	0	0	0	0	0.145	0.17	0.9	0.53	0.962
COL4A2	COL1A1	4442382	4433346	9606.ENSP00000353654	9606.ENSP00000225964	0	0	0.378	0.698	0.509	0	0.9	0.628	0.962
TOP2A	KIAA0101	4448614	4437621	9606.ENSP00000411532	9606.ENSP00000300035	0	0	0	0	0.949	0	0	0.263	0.961
VAV1	CXCR4	4451047	4447439	9606.ENSP00000472929	9606.ENSP00000386884	0	0	0	0	0.107	0.379	0.9	0.381	0.961
CTH	BHMT	4443637	4436127	9606.ENSP00000359976	9606.ENSP00000274353	0.184	0	0	0	0.08	0	0.8	0.771	0.961
SCNN1A	WNK4	4442340	4434005	9606.ENSP00000353292	9606.ENSP00000246914	0	0	0	0	0.061	0	0.9	0.621	0.961
SERPINA1	FN1	4448813	4441661	9606.ENSP00000416066	9606.ENSP00000346839	0	0	0	0	0	0.264	0.9	0.517	0.961
HLA-E	TYROBP	4444757	4435115	9606.ENSP00000365817	9606.ENSP00000262629	0	0	0	0	0.153	0	0.9	0.586	0.961
S100A10	PLAT	4443194	4433132	9606.ENSP00000357801	9606.ENSP00000220809	0	0	0	0	0.062	0	0.9	0.623	0.961
PLAU	FN1	4444017	4441661	9606.ENSP00000361850	9606.ENSP00000346839	0	0	0	0	0.102	0	0.9	0.592	0.96
ACLY	PCK2	4434323	4432982	9606.ENSP00000253792	9606.ENSP00000216780	0	0	0	0	0.063	0	0.9	0.614	0.96
HLA-B	TAP1	4448060	4441602	9606.ENSP00000399168	9606.ENSP00000346206	0	0	0	0	0.213	0.348	0.9	0.319	0.96
FCER1G	TYROBP	4436828	4435115	9606.ENSP00000289902	9606.ENSP00000262629	0	0	0	0	0.888	0	0	0.659	0.96
HMGCS2	FABP1	4443311	4437198	9606.ENSP00000358414	9606.ENSP00000295834	0	0	0	0	0.25	0	0.9	0.51	0.96
ALDH6A1	ACADM	4450308	4443625	9606.ENSP00000450436	9606.ENSP00000359871	0	0	0	0	0.148	0	0.9	0.567	0.96
SH2B3	KIT	4441528	4436763	9606.ENSP00000345492	9606.ENSP00000288135	0	0	0	0	0	0.379	0.9	0.414	0.96
HLA-DMB	HLA-DQA1	4448054	4440953	9606.ENSP00000398890	9606.ENSP00000339398	0	0	0	0.636	0.36	0.268	0.9	0.626	0.96
ALDH6A1	ABAT	4450308	4446571	9606.ENSP00000450436	9606.ENSP00000379845	0	0	0	0	0.187	0	0.9	0.543	0.959
HLA-DPB1	HLA-DRA	4448476	4446403	9606.ENSP00000408146	9606.ENSP00000378786	0	0	0	0.665	0.394	0.195	0.9	0.732	0.959
ACADSB	ACAT1	4443211	4435651	9606.ENSP00000357873	9606.ENSP00000265838	0.055	0	0	0	0.441	0	0.9	0.322	0.959
BTK	TYROBP	4451790	4435115	9606.ENSP00000483570	9606.ENSP00000262629	0	0	0	0	0.368	0	0.9	0.412	0.959
VAV1	KIT	4451047	4436763	9606.ENSP00000472929	9606.ENSP00000288135	0	0	0	0	0	0.261	0.9	0.492	0.959
RDH12	ALDH1A2	4450275	4434106	9606.ENSP00000449079	9606.ENSP00000249750	0	0	0	0	0.064	0.109	0.9	0.559	0.958
GCAT	SHMT2	4445585	4440475	9606.ENSP00000371110	9606.ENSP00000333667	0.076	0	0	0	0.088	0	0.9	0.567	0.958
TYMS	NCAPG	4439011	4434176	9606.ENSP00000315644	9606.ENSP00000251496	0	0	0	0	0.95	0	0	0.194	0.958
FBP1	ALDOC	4448472	4433361	9606.ENSP00000408025	9606.ENSP00000226253	0	0	0	0	0.129	0	0.9	0.565	0.958
HLA-E	HLA-DMA	4444757	4444460	9606.ENSP00000365817	9606.ENSP00000363976	0	0	0	0	0.139	0	0.9	0.562	0.958
ACADM	ACAT1	4443625	4435651	9606.ENSP00000359871	9606.ENSP00000265838	0.055	0	0	0	0.422	0	0.9	0.326	0.958
CD36	FABP1	4448068	4437198	9606.ENSP00000399421	9606.ENSP00000295834	0	0	0	0	0.077	0	0.9	0.587	0.958
HLA-G	CD8A	4448666	4447395	9606.ENSP00000412927	9606.ENSP00000386559	0	0	0	0	0	0.522	0.9	0.203	0.958
ACO1	ACLY	4438505	4434323	9606.ENSP00000309477	9606.ENSP00000253792	0.079	0	0	0	0.113	0.134	0.9	0.504	0.958
HLA-B	CD8A	4448060	4447395	9606.ENSP00000399168	9606.ENSP00000386559	0	0	0	0	0.065	0.522	0.9	0.185	0.958
SCNN1B	SCNN1G	4441549	4437627	9606.ENSP00000345751	9606.ENSP00000300061	0	0	0	0.868	0.221	0.432	0.9	0.943	0.957
SHMT2	SDS	4440475	4434551	9606.ENSP00000333667	9606.ENSP00000257549	0	0	0	0	0.063	0	0.9	0.586	0.957
GLDC	AGXT	4445533	4437874	9606.ENSP00000370737	9606.ENSP00000302620	0	0	0	0	0.078	0	0.9	0.574	0.957
GCAT	GLDC	4445585	4445533	9606.ENSP00000371110	9606.ENSP00000370737	0	0	0	0	0.081	0	0.9	0.578	0.957
AGXT	DAO	4437874	4433414	9606.ENSP00000302620	9606.ENSP00000228476	0.13	0	0	0	0.268	0	0.9	0.411	0.957
CLDN19	CLDN16	4437271	4435489	9606.ENSP00000296387	9606.ENSP00000264734	0	0	0	0.634	0	0.379	0.9	0.952	0.957
CXCR4	CXCL9	4447439	4442567	9606.ENSP00000386884	9606.ENSP00000354901	0	0	0	0	0.065	0	0.9	0.584	0.957
HADH	OXCT1	4451107	4432761	9606.ENSP00000474560	9606.ENSP00000196371	0.167	0	0	0	0.09	0	0.9	0.496	0.956
CSPG4	VCAN	4438793	4435552	9606.ENSP00000312506	9606.ENSP00000265077	0	0	0	0	0.062	0	0.9	0.578	0.956
ATP6V0E2	ATP6V1C2	4448619	4436011	9606.ENSP00000411672	9606.ENSP00000272238	0	0	0	0	0.062	0	0.9	0.569	0.956
ENPP3	ENTPD1	4448408	4443695	9606.ENSP00000406261	9606.ENSP00000360250	0	0	0	0	0.064	0.05	0.9	0.572	0.956
CXCR4	CCL20	4447439	4442174	9606.ENSP00000386884	9606.ENSP00000351671	0	0	0	0	0	0	0.9	0.586	0.956
GABRA2	GPHN	4449188	4448937	9606.ENSP00000421828	9606.ENSP00000417901	0	0	0	0	0	0.348	0.9	0.386	0.956
ALB	TIMP1	4437206	4433052	9606.ENSP00000295897	9606.ENSP00000218388	0	0	0	0	0	0	0.9	0.587	0.956
EDN1	EGF	4445200	4435570	9606.ENSP00000368683	9606.ENSP00000265171	0	0	0	0	0	0	0.9	0.586	0.956
HLA-DPA1	HLA-DRA	4447805	4446403	9606.ENSP00000393566	9606.ENSP00000378786	0	0	0	0.957	0.56	0	0.9	0.771	0.955
IFI27	ISG20	4451772	4438236	9606.ENSP00000483430	9606.ENSP00000306565	0	0	0	0	0.062	0	0.9	0.559	0.955
PIPOX	ACOX2	4439149	4438346	9606.ENSP00000317721	9606.ENSP00000307697	0	0	0	0	0.063	0	0.9	0.56	0.955
ST3GAL6	FUT3	4451535	4438140	9606.ENSP00000480884	9606.ENSP00000305603	0	0	0	0	0	0	0.9	0.572	0.955
HACL1	PHYH	4439635	4435183	9606.ENSP00000323811	9606.ENSP00000263038	0.051	0	0	0	0.063	0	0.9	0.557	0.955
CYBB	CD53	4445083	4435973	9606.ENSP00000367851	9606.ENSP00000271324	0	0	0	0	0.488	0	0.9	0.199	0.955
SCNN1B	WNK4	4441549	4434005	9606.ENSP00000345751	9606.ENSP00000246914	0	0	0	0	0.061	0	0.9	0.562	0.955
HLA-DRA	HLA-DQA1	4446403	4440953	9606.ENSP00000378786	9606.ENSP00000339398	0	0	0	0.95	0.557	0	0.9	0.849	0.955
VEGFA	PGF	4451310	4450339	9606.ENSP00000478570	9606.ENSP00000451040	0	0	0	0.897	0	0.514	0.9	0.942	0.954
COL5A2	COL4A2	4444466	4442382	9606.ENSP00000364000	9606.ENSP00000353654	0	0	0.397	0.692	0.404	0	0.9	0.592	0.954
SERPINA1	KNG1	4448813	4435537	9606.ENSP00000416066	9606.ENSP00000265023	0	0	0	0	0.095	0	0.9	0.534	0.954
KNG1	C3	4435537	4433951	9606.ENSP00000265023	9606.ENSP00000245907	0	0	0	0	0.094	0	0.9	0.54	0.954
NNMT	AOX1	4449990	4444440	9606.ENSP00000441434	9606.ENSP00000363832	0	0	0	0	0.175	0	0.9	0.49	0.954
ATP6V0E2	ATP6V1B1	4448619	4433629	9606.ENSP00000411672	9606.ENSP00000234396	0	0	0	0	0.12	0	0.9	0.527	0.954
CD36	SLC27A2	4448068	4435783	9606.ENSP00000399421	9606.ENSP00000267842	0	0	0	0	0.05	0	0.9	0.556	0.954
PLG	SPARC	4438461	4433520	9606.ENSP00000308938	9606.ENSP00000231061	0	0	0	0	0	0.379	0.9	0.32	0.954
SCNN1A	SCNN1B	4442340	4441549	9606.ENSP00000353292	9606.ENSP00000345751	0	0	0	0.821	0.107	0.432	0.9	0.941	0.954
PRF1	GNLY	4448031	4435328	9606.ENSP00000398568	9606.ENSP00000263863	0	0	0	0	0.783	0	0	0.794	0.953
VEGFA	KIT	4451310	4436763	9606.ENSP00000478570	9606.ENSP00000288135	0	0	0	0	0	0.174	0.6	0.87	0.953
ANGPTL4	PPARGC1A	4437761	4435507	9606.ENSP00000301455	9606.ENSP00000264867	0	0	0	0	0	0	0.9	0.557	0.953
HS6ST2	GPC3	4449504	4446259	9606.ENSP00000429473	9606.ENSP00000377836	0	0	0	0	0.11	0	0.9	0.52	0.953
EPHX2	AGXT	4449539	4437874	9606.ENSP00000430269	9606.ENSP00000302620	0.228	0	0	0	0.066	0	0.9	0.432	0.953
HLA-DRA	HLA-E	4446403	4444757	9606.ENSP00000378786	9606.ENSP00000365817	0	0	0	0	0.175	0	0.9	0.487	0.953
ACOX2	SLC27A2	4438346	4435783	9606.ENSP00000307697	9606.ENSP00000267842	0	0	0	0	0.065	0	0.9	0.538	0.953
PIPOX	DAO	4439149	4433414	9606.ENSP00000317721	9606.ENSP00000228476	0	0	0	0	0.063	0	0.9	0.541	0.953
MELK	NCAPG	4437455	4434176	9606.ENSP00000298048	9606.ENSP00000251496	0	0	0	0	0.925	0	0	0.4	0.953
FN1	LAMC1	4441661	4434618	9606.ENSP00000346839	9606.ENSP00000258341	0	0	0	0	0.222	0	0.9	0.44	0.952
VEGFA	ANGPT2	4451310	4438957	9606.ENSP00000478570	9606.ENSP00000314897	0	0	0	0	0	0.294	0	0.935	0.952
APLN	CXCR4	4447715	4447439	9606.ENSP00000391800	9606.ENSP00000386884	0	0	0	0	0	0	0.9	0.54	0.952
CTSS	LYZ	4443237	4434847	9606.ENSP00000357981	9606.ENSP00000261267	0	0	0	0	0.484	0	0.9	0.156	0.952
HLA-DPA1	HLA-DMA	4447805	4444460	9606.ENSP00000393566	9606.ENSP00000363976	0	0	0	0.719	0.443	0	0.9	0.678	0.952
SDSL	SHMT2	4447273	4440475	9606.ENSP00000385790	9606.ENSP00000333667	0	0	0	0	0.063	0	0.9	0.532	0.952
SERPINA1	APOB	4448813	4433584	9606.ENSP00000416066	9606.ENSP00000233242	0	0	0	0	0.219	0	0.9	0.441	0.952
HAO2	DAO	4451782	4433414	9606.ENSP00000483507	9606.ENSP00000228476	0	0	0	0	0.201	0	0.9	0.458	0.952
HAO2	ACOX2	4451782	4438346	9606.ENSP00000483507	9606.ENSP00000307697	0.044	0	0	0	0.086	0	0.9	0.521	0.952
CEP55	ASPM	4443758	4442873	9606.ENSP00000360540	9606.ENSP00000356379	0	0	0	0	0.932	0	0	0.325	0.952
ITGAL	CD53	4441903	4435973	9606.ENSP00000349252	9606.ENSP00000271324	0	0	0	0	0.335	0.064	0.9	0.317	0.951
SERPINA1	HRG	4448813	4433552	9606.ENSP00000416066	9606.ENSP00000232003	0	0	0	0	0.189	0	0.9	0.444	0.951
KNG1	VWF	4435537	4434871	9606.ENSP00000265023	9606.ENSP00000261405	0	0	0	0	0	0	0.9	0.531	0.951
PLG	PLAT	4438461	4433132	9606.ENSP00000308938	9606.ENSP00000220809	0	0	0	0.756	0.056	0.379	0.9	0.953	0.951
PLAU	PLG	4444017	4438461	9606.ENSP00000361850	9606.ENSP00000308938	0	0	0	0.745	0	0.379	0.9	0.961	0.951
BMPR1B	CHRDL1	4448203	4443870	9606.ENSP00000401907	9606.ENSP00000361112	0	0	0	0	0.062	0	0.9	0.526	0.951
HLA-DPA1	HLA-DQB2	4447805	4447655	9606.ENSP00000393566	9606.ENSP00000390431	0	0	0	0.653	0.148	0.297	0.9	0.756	0.951
PCK1	ACLY	4439313	4434323	9606.ENSP00000319814	9606.ENSP00000253792	0	0	0	0	0.063	0	0.9	0.525	0.951
CP	HMOX1	4435459	4432912	9606.ENSP00000264613	9606.ENSP00000216117	0	0	0	0	0.061	0.076	0.9	0.506	0.951
PTGDS	PTGS1	4443785	4442503	9606.ENSP00000360687	9606.ENSP00000354612	0	0	0	0	0	0	0.9	0.535	0.951
CSPG4	DCN	4438793	4432629	9606.ENSP00000312506	9606.ENSP00000052754	0	0	0	0	0.137	0	0.9	0.475	0.95
CD8A	CD247	4447395	4442542	9606.ENSP00000386559	9606.ENSP00000354782	0	0	0	0	0.359	0	0.9	0.295	0.95
CD300A	CD53	4442338	4435973	9606.ENSP00000353259	9606.ENSP00000271324	0	0	0	0	0.53	0	0.9	0	0.95
TRIM22	GBP5	4445296	4443538	9606.ENSP00000369299	9606.ENSP00000359488	0	0	0	0	0.53	0	0.9	0	0.95
CTGF	FN1	4442998	4441661	9606.ENSP00000356954	9606.ENSP00000346839	0	0	0	0	0.309	0.294	0	0.905	0.95
FN1	KNG1	4441661	4435537	9606.ENSP00000346839	9606.ENSP00000265023	0	0	0	0	0.052	0	0.9	0.519	0.95
HRG	SERPINE1	4433552	4433266	9606.ENSP00000232003	9606.ENSP00000223095	0	0	0	0	0.063	0	0.9	0.515	0.95
HLA-DPB1	HLA-DQA1	4448476	4440953	9606.ENSP00000408146	9606.ENSP00000339398	0	0	0	0.644	0.174	0.195	0.9	0.897	0.95
GBP2	ISG20	4443541	4438236	9606.ENSP00000359497	9606.ENSP00000306565	0	0	0	0	0.124	0	0.9	0.479	0.95
ALB	SPARC	4437206	4433520	9606.ENSP00000295897	9606.ENSP00000231061	0	0	0	0	0	0	0.9	0.529	0.95
SLC27A2	PHYH	4435783	4435183	9606.ENSP00000267842	9606.ENSP00000263038	0	0	0	0	0.063	0	0.9	0.512	0.95
HLA-DPA1	HLA-E	4447805	4444757	9606.ENSP00000393566	9606.ENSP00000365817	0	0	0	0	0.154	0	0.9	0.456	0.95
C3	APOB	4433951	4433584	9606.ENSP00000245907	9606.ENSP00000233242	0	0	0	0	0.167	0	0.9	0.458	0.95
HLA-DQB2	HLA-DRA	4447655	4446403	9606.ENSP00000390431	9606.ENSP00000378786	0	0	0	0.66	0.162	0.297	0.9	0.679	0.95
PLG	C3	4438461	4433951	9606.ENSP00000308938	9606.ENSP00000245907	0	0	0	0	0.148	0.05	0.8	0.732	0.95
CD8A	HLA-E	4447395	4444757	9606.ENSP00000386559	9606.ENSP00000365817	0	0	0	0	0.07	0.465	0.9	0.118	0.95
ATP6V0E2	ATP6V1G3	4448619	4436410	9606.ENSP00000411672	9606.ENSP00000281087	0	0	0	0	0.14	0	0.9	0.46	0.949
IGFBP3	TIMP1	4445494	4433052	9606.ENSP00000370473	9606.ENSP00000218388	0	0	0	0	0.117	0	0.9	0.477	0.949
COL4A4	COL4A3	4446575	4446565	9606.ENSP00000379866	9606.ENSP00000379823	0	0	0.426	0.846	0.395	0	0.9	0.923	0.949
HAO2	GRHPR	4451782	4438861	9606.ENSP00000483507	9606.ENSP00000313432	0.219	0	0	0	0.148	0	0.9	0.327	0.949
ITGB2	CD300A	4446737	4442338	9606.ENSP00000380948	9606.ENSP00000353259	0	0	0	0	0.505	0	0.9	0.06	0.949
ASPM	MELK	4442873	4437455	9606.ENSP00000356379	9606.ENSP00000298048	0	0	0	0	0.923	0.064	0	0.346	0.949
SCNN1A	SCNN1G	4442340	4437627	9606.ENSP00000353292	9606.ENSP00000300061	0	0	0	0.844	0.064	0.432	0.9	0.833	0.949
CYBB	ITGAL	4445083	4441903	9606.ENSP00000367851	9606.ENSP00000349252	0	0	0	0	0.458	0	0.9	0.138	0.949
COL1A1	PLOD3	4433346	4433268	9606.ENSP00000225964	9606.ENSP00000223127	0	0	0	0	0.095	0.17	0.9	0.408	0.949
CD300A	FCER1G	4442338	4436828	9606.ENSP00000353259	9606.ENSP00000289902	0	0	0	0	0.335	0.129	0.9	0.237	0.949
CP	APOB	4435459	4433584	9606.ENSP00000264613	9606.ENSP00000233242	0	0	0	0	0.15	0	0.9	0.448	0.949
IGFBP3	ALB	4445494	4437206	9606.ENSP00000370473	9606.ENSP00000295897	0	0	0	0	0.098	0	0.9	0.473	0.948
GPC3	ALB	4446259	4437206	9606.ENSP00000377836	9606.ENSP00000295897	0	0	0	0	0.214	0	0.9	0.399	0.948
HLA-DPB1	HLA-DMB	4448476	4448054	9606.ENSP00000408146	9606.ENSP00000398890	0	0	0	0.677	0.38	0	0.9	0.66	0.948
SPTBN2	ANK2	4449634	4441946	9606.ENSP00000432568	9606.ENSP00000349588	0	0	0	0	0.105	0.186	0.9	0.377	0.948
COL4A1	PLOD2	4444632	4436514	9606.ENSP00000364979	9606.ENSP00000282903	0	0	0	0	0.169	0.185	0.9	0.329	0.948
DACH1	EYA4	4451650	4449645	9606.ENSP00000482245	9606.ENSP00000432770	0	0	0	0	0	0.661	0	0.854	0.948
VAV1	CD247	4451047	4442542	9606.ENSP00000472929	9606.ENSP00000354782	0	0	0	0	0.124	0.267	0.9	0.291	0.948
INHBB	FSTL3	4437136	4432697	9606.ENSP00000295228	9606.ENSP00000166139	0	0	0	0	0.077	0.185	0.9	0.385	0.947
ITGB2	FCGR2A	4446737	4435978	9606.ENSP00000380948	9606.ENSP00000271450	0	0	0	0	0.327	0	0.9	0.287	0.947
SPARC	TIMP1	4433520	4433052	9606.ENSP00000231061	9606.ENSP00000218388	0	0	0	0	0.119	0	0.9	0.447	0.947
FN1	FSTL3	4441661	4432697	9606.ENSP00000346839	9606.ENSP00000166139	0	0	0	0	0.098	0.379	0.9	0.172	0.947
AGXT	SDS	4437874	4434551	9606.ENSP00000302620	9606.ENSP00000257549	0.147	0	0	0	0.096	0.058	0.9	0.392	0.947
FYB	CD3D	4449385	4437689	9606.ENSP00000427114	9606.ENSP00000300692	0	0	0	0	0.356	0	0.9	0.245	0.947
FCER1G	CD53	4436828	4435973	9606.ENSP00000289902	9606.ENSP00000271324	0	0	0	0	0.346	0	0.9	0.255	0.947
VAV1	NCKAP1L	4451047	4437010	9606.ENSP00000472929	9606.ENSP00000293373	0	0	0	0	0.368	0	0.9	0.237	0.947
TNFRSF1B	ITGAL	4444700	4441903	9606.ENSP00000365435	9606.ENSP00000349252	0	0	0	0	0.2	0	0.9	0.398	0.947
C3	C5	4433951	4433289	9606.ENSP00000245907	9606.ENSP00000223642	0	0	0	0.754	0.063	0.379	0.9	0.73	0.947
TNFRSF1B	TNFSF13B	4444700	4444645	9606.ENSP00000365435	9606.ENSP00000365048	0	0	0	0	0.092	0	0.9	0.473	0.947
VWF	TIMP1	4434871	4433052	9606.ENSP00000261405	9606.ENSP00000218388	0	0	0	0	0.062	0	0.9	0.481	0.947
ALB	PROC	4437206	4433614	9606.ENSP00000295897	9606.ENSP00000234071	0	0	0	0	0.323	0	0.9	0.287	0.947
EGF	SPARC	4435570	4433520	9606.ENSP00000265171	9606.ENSP00000231061	0	0	0	0	0.061	0	0.9	0.473	0.946
ALB	HRG	4437206	4433552	9606.ENSP00000295897	9606.ENSP00000232003	0	0	0	0	0.177	0	0.9	0.403	0.946
VCAN	TIMP1	4435552	4433052	9606.ENSP00000265077	9606.ENSP00000218388	0	0	0	0	0.064	0	0.9	0.476	0.946
HLA-B	TYROBP	4448060	4435115	9606.ENSP00000399168	9606.ENSP00000262629	0	0	0	0	0.142	0	0.9	0.415	0.945
CD3D	IL2RB	4437689	4432931	9606.ENSP00000300692	9606.ENSP00000216223	0	0	0	0	0.312	0	0.9	0.268	0.945
CEP55	NCAPG	4443758	4434176	9606.ENSP00000360540	9606.ENSP00000251496	0	0	0	0	0.923	0	0	0.318	0.945
CALB1	PVALB	4435604	4432927	9606.ENSP00000265431	9606.ENSP00000216200	0	0	0	0	0.106	0	0	0.941	0.945
HADH	HIBCH	4451107	4442284	9606.ENSP00000474560	9606.ENSP00000352706	0.072	0	0	0	0.227	0	0.9	0.334	0.945
HLA-DRA	CTSS	4446403	4443237	9606.ENSP00000378786	9606.ENSP00000357981	0	0	0	0	0.277	0	0.9	0.309	0.945
HLA-DMB	HLA-DQB1	4448054	4444478	9606.ENSP00000398890	9606.ENSP00000364080	0	0	0	0.664	0.346	0	0.9	0.618	0.945
KLHL3	WNK4	4438782	4434005	9606.ENSP00000312397	9606.ENSP00000246914	0	0	0	0	0	0.379	0	0.913	0.944
ITGB2	C3	4446737	4433951	9606.ENSP00000380948	9606.ENSP00000245907	0	0	0	0	0.063	0.294	0.9	0.255	0.944
TNFRSF1B	BIRC3	4444700	4435265	9606.ENSP00000365435	9606.ENSP00000263464	0	0	0	0	0.105	0	0.9	0.431	0.944
IFI16	PYCARD	4443043	4434024	9606.ENSP00000357113	9606.ENSP00000247470	0	0	0	0	0.088	0.376	0.8	0.567	0.944
HAO2	HACL1	4451782	4439635	9606.ENSP00000483507	9606.ENSP00000323811	0.142	0	0	0	0.064	0	0.9	0.393	0.944
GPC5	DCN	4444820	4432629	9606.ENSP00000366267	9606.ENSP00000052754	0	0	0	0	0.061	0.064	0.9	0.44	0.944
PHKA2	PYGL	4445291	4432954	9606.ENSP00000369274	9606.ENSP00000216392	0	0	0	0	0.065	0	0.9	0.45	0.944
CTH	SDS	4443637	4434551	9606.ENSP00000359976	9606.ENSP00000257549	0.165	0	0	0	0.081	0	0.8	0.68	0.944
FBP1	PFKP	4448472	4445499	9606.ENSP00000408025	9606.ENSP00000370517	0.135	0	0	0	0.061	0.07	0.8	0.687	0.944
CP	PROC	4435459	4433614	9606.ENSP00000264613	9606.ENSP00000234071	0	0	0	0	0.111	0.379	0.9	0.09	0.943
VAV1	FCER1G	4451047	4436828	9606.ENSP00000472929	9606.ENSP00000289902	0	0	0	0	0.208	0.15	0.9	0.255	0.943
TOP2A	TYMS	4448614	4439011	9606.ENSP00000411532	9606.ENSP00000315644	0.112	0	0	0	0.83	0	0	0.653	0.943
SLIT2	CXCL12	4449223	4446453	9606.ENSP00000422591	9606.ENSP00000379140	0	0	0	0	0.12	0	0.9	0.412	0.943
AOX1	AGXT2	4444440	4433532	9606.ENSP00000363832	9606.ENSP00000231420	0	0	0	0	0.064	0	0.9	0.444	0.943
FABP1	PLIN2	4437198	4436246	9606.ENSP00000295834	9606.ENSP00000276914	0	0	0	0	0.061	0	0.9	0.451	0.943
CASR	LPAR5	4449096	4439960	9606.ENSP00000420194	9606.ENSP00000327875	0	0	0	0	0	0	0.9	0.455	0.943
ACADM	FABP1	4443625	4437198	9606.ENSP00000359871	9606.ENSP00000295834	0	0	0	0	0.061	0	0.9	0.445	0.943
GPC3	DCN	4446259	4432629	9606.ENSP00000377836	9606.ENSP00000052754	0	0	0	0	0.061	0.064	0.9	0.429	0.943
COL4A2	PLOD2	4442382	4436514	9606.ENSP00000353654	9606.ENSP00000282903	0	0	0	0	0.158	0.185	0.9	0.278	0.943
BNIP3	GABARAPL1	4443138	4435700	9606.ENSP00000357625	9606.ENSP00000266458	0	0	0	0	0.14	0	0.8	0.698	0.943
ABAT	ALDH1B1	4446571	4444922	9606.ENSP00000379845	9606.ENSP00000366927	0.053	0	0	0	0.113	0.126	0.9	0.337	0.942
CD36	APOB	4448068	4433584	9606.ENSP00000399421	9606.ENSP00000233242	0	0	0	0	0.061	0	0.9	0.435	0.942
CEP55	MELK	4443758	4437455	9606.ENSP00000360540	9606.ENSP00000298048	0	0	0	0	0.909	0	0	0.389	0.942
MYL3	TNNC1	4446468	4433570	9606.ENSP00000379210	9606.ENSP00000232975	0	0	0.369	0.778	0.325	0	0.9	0.56	0.942
GATA3	CCND1	4445191	4433391	9606.ENSP00000368632	9606.ENSP00000227507	0	0	0	0	0.062	0	0.9	0.434	0.942
ITGB2	KNG1	4446737	4435537	9606.ENSP00000380948	9606.ENSP00000265023	0	0	0	0	0.061	0.379	0.9	0.123	0.942
CXCL12	EDN1	4446453	4445200	9606.ENSP00000379140	9606.ENSP00000368683	0	0	0	0	0	0	0.9	0.446	0.942
PCCB	ACADM	4449005	4443625	9606.ENSP00000419027	9606.ENSP00000359871	0.071	0	0	0	0.108	0	0.9	0.387	0.942
TAP1	HLA-F	4441602	4434738	9606.ENSP00000346206	9606.ENSP00000259951	0	0	0	0	0.122	0.294	0.9	0.183	0.942
PTPRD	PPFIA4	4445514	4436005	9606.ENSP00000370593	9606.ENSP00000272198	0	0	0	0	0.098	0.26	0.9	0.244	0.942
KNG1	CP	4435537	4435459	9606.ENSP00000265023	9606.ENSP00000264613	0	0	0	0	0.108	0	0.9	0.408	0.942
COL4A2	LUM	4442382	4435725	9606.ENSP00000353654	9606.ENSP00000266718	0	0	0	0	0.298	0.082	0.9	0.209	0.942
NNMT	S100A10	4449990	4443194	9606.ENSP00000441434	9606.ENSP00000357801	0	0	0	0	0.941	0	0	0.06	0.942
HADH	HMGCS2	4451107	4443311	9606.ENSP00000474560	9606.ENSP00000358414	0	0	0	0	0.061	0	0.9	0.433	0.942
HLA-G	TAP1	4448666	4441602	9606.ENSP00000412927	9606.ENSP00000346206	0	0	0	0	0.065	0.379	0.9	0.13	0.942
FECH	CP	4445732	4435459	9606.ENSP00000372326	9606.ENSP00000264613	0	0	0	0	0	0	0.9	0.44	0.941
CYBB	FCER1G	4445083	4436828	9606.ENSP00000367851	9606.ENSP00000289902	0	0	0	0	0.366	0	0.9	0.151	0.941
FN1	HRG	4441661	4433552	9606.ENSP00000346839	9606.ENSP00000232003	0	0	0	0	0	0.098	0.9	0.404	0.941
GPC5	VCAN	4444820	4435552	9606.ENSP00000366267	9606.ENSP00000265077	0	0	0	0	0	0	0.9	0.44	0.941
LUM	DCN	4435725	4432629	9606.ENSP00000266718	9606.ENSP00000052754	0	0	0.445	0.736	0.914	0	0	0.894	0.941
CYP2J2	CYP4F3	4443694	4433149	9606.ENSP00000360247	9606.ENSP00000221307	0	0	0.442	0.602	0.062	0	0.9	0.707	0.941
FBP1	HK2	4448472	4436875	9606.ENSP00000408025	9606.ENSP00000290573	0	0	0	0	0.049	0	0.9	0.438	0.941
CYP2J2	CYP4A11	4443694	4438655	9606.ENSP00000360247	9606.ENSP00000311095	0	0	0.435	0.608	0.062	0	0.9	0.73	0.941
VWF	SPARC	4434871	4433520	9606.ENSP00000261405	9606.ENSP00000231061	0	0	0	0	0.118	0	0.9	0.391	0.941
HLA-E	HLA-DQA1	4444757	4440953	9606.ENSP00000365817	9606.ENSP00000339398	0	0	0	0	0	0	0.9	0.429	0.94
SERPINA1	TIMP1	4448813	4433052	9606.ENSP00000416066	9606.ENSP00000218388	0	0	0	0	0.095	0	0.9	0.399	0.94
BMPR1B	SOSTDC1	4448203	4438091	9606.ENSP00000401907	9606.ENSP00000304930	0	0	0	0	0	0	0.9	0.424	0.94
HLA-DQA1	ICAM1	4440953	4435501	9606.ENSP00000339398	9606.ENSP00000264832	0	0	0	0	0.061	0	0.9	0.415	0.94
GPC3	VCAN	4446259	4435552	9606.ENSP00000377836	9606.ENSP00000265077	0	0	0	0	0.065	0	0.9	0.416	0.94
AUH	HMGCS2	4444614	4443311	9606.ENSP00000364883	9606.ENSP00000358414	0.072	0	0	0	0.061	0	0.9	0.393	0.94
ADORA3	KNG1	4443373	4435537	9606.ENSP00000358730	9606.ENSP00000265023	0	0	0	0	0	0	0.9	0.428	0.94
G6PC	PCK2	4434327	4432982	9606.ENSP00000253801	9606.ENSP00000216780	0	0	0	0	0.081	0	0	0.936	0.939
HACL1	AGXT	4439635	4437874	9606.ENSP00000323811	9606.ENSP00000302620	0.219	0	0	0	0.077	0	0.9	0.261	0.939
KIT	PTPRO	4436763	4436417	9606.ENSP00000288135	9606.ENSP00000281171	0	0	0	0	0	0.413	0.9	0.058	0.939
HLA-B	HLA-DPA1	4448060	4447805	9606.ENSP00000399168	9606.ENSP00000393566	0	0	0	0.6	0.213	0	0.9	0.674	0.939
CD36	PPARGC1A	4448068	4435507	9606.ENSP00000399421	9606.ENSP00000264867	0	0	0	0	0	0	0.9	0.422	0.939
HLA-DRA	RGS1	4446403	4442888	9606.ENSP00000378786	9606.ENSP00000356429	0	0	0	0	0.333	0	0.9	0.162	0.939
ALOX5	CYP4F3	4444382	4433149	9606.ENSP00000363512	9606.ENSP00000221307	0	0	0	0	0	0	0.9	0.42	0.939
ENO2	PCK1	4449816	4439313	9606.ENSP00000437402	9606.ENSP00000319814	0	0	0	0	0	0	0.9	0.417	0.939
HLA-G	HLA-DQA1	4448666	4440953	9606.ENSP00000412927	9606.ENSP00000339398	0	0	0	0	0	0	0.9	0.424	0.939
ITGA4	ITGAL	4446627	4441903	9606.ENSP00000380227	9606.ENSP00000349252	0	0	0	0.602	0.132	0	0.9	0.837	0.939
ITGB2	TNFRSF1B	4446737	4444700	9606.ENSP00000380948	9606.ENSP00000365435	0	0	0	0	0.287	0	0.9	0.213	0.939
FN1	CP	4441661	4435459	9606.ENSP00000346839	9606.ENSP00000264613	0	0	0	0	0.082	0	0.9	0.39	0.939
FN1	APOB	4441661	4433584	9606.ENSP00000346839	9606.ENSP00000233242	0	0	0	0	0.086	0	0.9	0.381	0.938
ECHS1	HIBCH	4443119	4442284	9606.ENSP00000357535	9606.ENSP00000352706	0	0	0.371	0.694	0.129	0	0.9	0.786	0.938
COL4A1	PLOD3	4444632	4433268	9606.ENSP00000364979	9606.ENSP00000223127	0	0	0	0	0.062	0.185	0.9	0.291	0.938
PCCB	ACAA1	4449005	4440473	9606.ENSP00000419027	9606.ENSP00000333664	0.093	0	0	0	0.114	0	0.9	0.328	0.938
FYB	CD247	4449385	4442542	9606.ENSP00000427114	9606.ENSP00000354782	0	0	0	0	0.328	0	0.9	0.157	0.938
GNLY	GZMB	4435328	4432950	9606.ENSP00000263863	9606.ENSP00000216341	0	0	0	0	0.797	0	0	0.707	0.938
TLR7	TLR3	4445433	4437339	9606.ENSP00000370034	9606.ENSP00000296795	0	0	0	0.6	0.063	0	0.9	0.938	0.938
SERPINA1	VWF	4448813	4434871	9606.ENSP00000416066	9606.ENSP00000261405	0	0	0	0	0	0	0.9	0.399	0.937
TREM2	SEMA6D	4444111	4439723	9606.ENSP00000362205	9606.ENSP00000324857	0	0	0	0	0	0	0.9	0.397	0.937
AOX1	MAOA	4444440	4441072	9606.ENSP00000363832	9606.ENSP00000340684	0	0	0	0	0.096	0	0.9	0.364	0.937
TUBAL3	TUBB2B	4445389	4434727	9606.ENSP00000369784	9606.ENSP00000259818	0	0	0	0.906	0.129	0.317	0.9	0.402	0.937
VAV1	CXCL12	4451047	4446453	9606.ENSP00000472929	9606.ENSP00000379140	0	0	0	0	0	0	0.9	0.4	0.937
LAMC1	LAMA4	4434618	4433505	9606.ENSP00000258341	9606.ENSP00000230538	0	0	0	0.55	0.116	0	0.9	0.718	0.937
SHMT2	DAO	4440475	4433414	9606.ENSP00000333667	9606.ENSP00000228476	0.124	0	0	0	0.061	0	0.9	0.326	0.937
ABCA1	FABP1	4444444	4437198	9606.ENSP00000363868	9606.ENSP00000295834	0	0	0	0	0.06	0	0.9	0.39	0.937
ALDH6A1	AGXT2	4450308	4433532	9606.ENSP00000450436	9606.ENSP00000231420	0	0.037	0	0	0.07	0	0.9	0.385	0.937
GPC3	APOB	4446259	4433584	9606.ENSP00000377836	9606.ENSP00000233242	0	0	0	0	0.312	0.133	0.9	0.071	0.937
GBP1	GBP2	4443543	4443541	9606.ENSP00000359504	9606.ENSP00000359497	0	0	0	0.979	0.784	0.719	0	0.903	0.937
TNFSF13B	BIRC3	4444645	4435265	9606.ENSP00000365048	9606.ENSP00000263464	0	0	0	0	0.087	0	0.9	0.36	0.936
HLA-DPA1	HLA-DQA1	4447805	4440953	9606.ENSP00000393566	9606.ENSP00000339398	0	0	0	0.953	0.363	0	0.9	0.832	0.936
HLA-DRA	CD3D	4446403	4437689	9606.ENSP00000378786	9606.ENSP00000300692	0	0	0	0	0.097	0	0.9	0.354	0.936
SERPINA4	APOH	4450325	4432817	9606.ENSP00000450838	9606.ENSP00000205948	0	0	0	0	0.363	0	0.9	0.086	0.936
IFI27	GBP2	4451772	4443541	9606.ENSP00000483430	9606.ENSP00000359497	0	0	0	0	0.102	0	0.9	0.348	0.936
SLIT2	CXCR4	4449223	4447439	9606.ENSP00000422591	9606.ENSP00000386884	0	0	0	0	0.063	0	0.9	0.376	0.936
PTGER1	KNG1	4436972	4435537	9606.ENSP00000292513	9606.ENSP00000265023	0	0	0	0	0	0	0.9	0.388	0.936
NUSAP1	MELK	4450429	4437455	9606.ENSP00000453403	9606.ENSP00000298048	0	0	0	0	0.873	0	0	0.52	0.936
VWF	PROC	4434871	4433614	9606.ENSP00000261405	9606.ENSP00000234071	0	0	0	0	0	0	0.9	0.392	0.936
HADH	PCCB	4451107	4449005	9606.ENSP00000474560	9606.ENSP00000419027	0.051	0	0	0	0.598	0	0.8	0.264	0.936
FN1	LGALS1	4441661	4432889	9606.ENSP00000346839	9606.ENSP00000215909	0	0	0	0	0.11	0.08	0.9	0.315	0.936
HLA-B	HLA-DRA	4448060	4446403	9606.ENSP00000399168	9606.ENSP00000378786	0	0	0	0.611	0.213	0	0.9	0.593	0.936
GCGR	ADCY7	4447027	4446306	9606.ENSP00000383558	9606.ENSP00000378187	0	0	0	0	0	0.092	0.9	0.361	0.936
LYZ	C3	4434847	4433951	9606.ENSP00000261267	9606.ENSP00000245907	0	0	0	0	0.097	0	0.9	0.356	0.936
FYB	SIRPA	4449385	4446972	9606.ENSP00000427114	9606.ENSP00000382941	0	0	0	0	0.093	0	0.9	0.354	0.936
HLA-E	ICAM1	4444757	4435501	9606.ENSP00000365817	9606.ENSP00000264832	0	0	0	0	0.102	0	0.9	0.354	0.936
SIRPA	CD300A	4446972	4442338	9606.ENSP00000382941	9606.ENSP00000353259	0	0	0	0	0.097	0	0.9	0.356	0.936
ENO2	PCK2	4449816	4432982	9606.ENSP00000437402	9606.ENSP00000216780	0	0	0	0	0	0	0.9	0.384	0.935
ALB	VCAN	4437206	4435552	9606.ENSP00000295897	9606.ENSP00000265077	0	0	0	0	0	0	0.9	0.384	0.935
CHRDL1	FSTL3	4443870	4432697	9606.ENSP00000361112	9606.ENSP00000166139	0	0	0	0	0	0	0.9	0.381	0.935
CXCL12	CCL28	4446453	4442460	9606.ENSP00000379140	9606.ENSP00000354416	0	0	0	0	0	0.221	0.9	0.243	0.935
CYBB	CD300A	4445083	4442338	9606.ENSP00000367851	9606.ENSP00000353259	0	0	0	0	0.383	0	0.9	0.041	0.935
HLA-B	GBP1	4448060	4443543	9606.ENSP00000399168	9606.ENSP00000359504	0	0	0	0	0.213	0	0.9	0.243	0.935
CASR	GCGR	4449096	4447027	9606.ENSP00000420194	9606.ENSP00000383558	0	0	0	0	0.085	0	0.9	0.346	0.935
CHST15	VCAN	4448230	4435552	9606.ENSP00000402394	9606.ENSP00000265077	0	0	0	0	0	0	0.9	0.386	0.935
SEMA6D	TYROBP	4439723	4435115	9606.ENSP00000324857	9606.ENSP00000262629	0	0	0	0	0	0	0.9	0.381	0.935
VAV1	CYBB	4451047	4445083	9606.ENSP00000472929	9606.ENSP00000367851	0	0	0	0	0.213	0	0.9	0.251	0.935
TIMP1	LGALS1	4433052	4432889	9606.ENSP00000218388	9606.ENSP00000215909	0	0	0	0	0.304	0	0.9	0.146	0.935
HLA-B	HLA-DQB1	4448060	4444478	9606.ENSP00000399168	9606.ENSP00000364080	0	0	0	0.629	0.096	0	0.9	0.847	0.935
SHMT2	PIPOX	4440475	4439149	9606.ENSP00000333667	9606.ENSP00000317721	0.124	0	0	0	0.061	0	0.9	0.294	0.934
ALDH6A1	ACAT1	4450308	4435651	9606.ENSP00000450436	9606.ENSP00000265838	0	0	0	0	0.27	0	0.9	0.179	0.934
CXCL9	FPR3	4442567	4441189	9606.ENSP00000354901	9606.ENSP00000341821	0	0	0	0	0.312	0	0.9	0.12	0.934
HLA-DPA1	HLA-F	4447805	4434738	9606.ENSP00000393566	9606.ENSP00000259951	0	0	0	0.624	0.152	0.112	0.9	0.535	0.934
GPC3	FN1	4446259	4441661	9606.ENSP00000377836	9606.ENSP00000346839	0	0	0	0	0.078	0	0.9	0.349	0.934
HAO2	HOGA1	4451782	4443592	9606.ENSP00000483507	9606.ENSP00000359680	0.148	0	0	0	0.15	0	0.9	0.203	0.934
ERBB4	EGF	4441238	4435570	9606.ENSP00000342235	9606.ENSP00000265171	0	0	0	0	0.177	0.078	0.6	0.809	0.934
COL4A2	PLOD3	4442382	4433268	9606.ENSP00000353654	9606.ENSP00000223127	0	0	0	0	0.095	0.185	0.9	0.22	0.934
HLA-DQB1	CTSS	4444478	4443237	9606.ENSP00000364080	9606.ENSP00000357981	0	0	0	0	0.233	0	0.9	0.21	0.934
CCL5	C3	4451102	4433951	9606.ENSP00000474412	9606.ENSP00000245907	0	0	0	0	0.063	0	0.9	0.356	0.934
SPARC	SERPINE1	4433520	4433266	9606.ENSP00000231061	9606.ENSP00000223095	0	0	0	0	0.125	0	0.9	0.312	0.934
VEGFA	SERPINA1	4451310	4448813	9606.ENSP00000478570	9606.ENSP00000416066	0	0	0	0	0.084	0	0.9	0.331	0.933
SH3GL2	EGF	4445424	4435570	9606.ENSP00000369981	9606.ENSP00000265171	0	0	0	0	0.062	0	0.9	0.349	0.933
GBP5	FCGR1B	4443538	4443305	9606.ENSP00000359488	9606.ENSP00000358391	0	0	0	0	0.124	0	0.9	0.296	0.933
CXCR4	ADORA3	4447439	4443373	9606.ENSP00000386884	9606.ENSP00000358730	0	0	0	0	0.064	0	0.9	0.348	0.933
COL4A2	COL5A3	4442382	4435500	9606.ENSP00000353654	9606.ENSP00000264828	0	0	0.398	0.658	0.12	0	0.9	0.523	0.933
COL5A2	COL8A1	4444466	4434820	9606.ENSP00000364000	9606.ENSP00000261037	0	0	0.44	0.712	0.145	0	0.9	0.557	0.933
CTGF	TGFBR3	4442998	4432850	9606.ENSP00000356954	9606.ENSP00000212355	0	0	0	0	0.061	0	0.9	0.345	0.933
COL8A1	COL1A1	4434820	4433346	9606.ENSP00000261037	9606.ENSP00000225964	0	0	0.433	0.708	0.16	0	0.9	0.482	0.933
EGF	APOB	4435570	4433584	9606.ENSP00000265171	9606.ENSP00000233242	0	0	0	0	0.061	0.085	0.9	0.313	0.933
ACOX2	AGXT	4438346	4437874	9606.ENSP00000307697	9606.ENSP00000302620	0	0	0	0	0.083	0	0.9	0.336	0.933
DTL	NCAPG	4442781	4434176	9606.ENSP00000355958	9606.ENSP00000251496	0	0	0	0	0.93	0	0	0.081	0.933
HLA-DPB1	HLA-B	4448476	4448060	9606.ENSP00000408146	9606.ENSP00000399168	0	0	0	0.639	0.111	0	0.9	0.799	0.933
TRIM22	GBP2	4445296	4443541	9606.ENSP00000369299	9606.ENSP00000359497	0	0	0	0	0.351	0	0.9	0.051	0.933
HRG	PLAT	4433552	4433132	9606.ENSP00000232003	9606.ENSP00000220809	0	0	0	0	0.061	0	0.9	0.35	0.933
KNG1	APOB	4435537	4433584	9606.ENSP00000265023	9606.ENSP00000233242	0	0	0	0	0.112	0	0.9	0.312	0.933
ADORA3	FPR3	4443373	4441189	9606.ENSP00000358730	9606.ENSP00000341821	0	0	0	0	0.25	0	0.9	0.188	0.933
ALDH6A1	ACAA1	4450308	4440473	9606.ENSP00000450436	9606.ENSP00000333664	0	0	0	0	0.189	0	0.9	0.246	0.933
HLA-G	ICAM1	4448666	4435501	9606.ENSP00000412927	9606.ENSP00000264832	0	0	0	0	0	0	0.9	0.35	0.932
TNFRSF1B	CD53	4444700	4435973	9606.ENSP00000365435	9606.ENSP00000271324	0	0	0	0	0.28	0	0.9	0.133	0.932
IGFBP3	STC2	4445494	4435556	9606.ENSP00000370473	9606.ENSP00000265087	0	0	0	0	0.156	0	0.9	0.263	0.932
NUSAP1	KIAA0101	4450429	4437621	9606.ENSP00000453403	9606.ENSP00000300035	0	0	0	0	0.891	0	0	0.408	0.932
COL5A2	LUM	4444466	4435725	9606.ENSP00000364000	9606.ENSP00000266718	0	0	0	0	0.613	0.082	0.72	0.399	0.932
CASP1	ARHGDIB	4449658	4433442	9606.ENSP00000433138	9606.ENSP00000228945	0	0	0	0	0.321	0.063	0.9	0.064	0.932
C1QA	TYROBP	4444428	4435115	9606.ENSP00000363773	9606.ENSP00000262629	0	0	0	0	0.897	0	0	0.363	0.932
ACAA1	ACAT1	4440473	4435651	9606.ENSP00000333664	9606.ENSP00000265838	0	0	0.447	0.767	0.09	0	0.9	0.897	0.932
ALOX5	CYP2J2	4444382	4443694	9606.ENSP00000363512	9606.ENSP00000360247	0	0	0	0	0	0	0.9	0.348	0.932
HACL1	PIPOX	4439635	4439149	9606.ENSP00000323811	9606.ENSP00000317721	0	0	0	0	0.063	0	0.9	0.333	0.932
CYBB	TNFRSF1B	4445083	4444700	9606.ENSP00000367851	9606.ENSP00000365435	0	0	0	0	0.198	0	0.9	0.224	0.932
ASS1	OAT	4443929	4443204	9606.ENSP00000361471	9606.ENSP00000357838	0.295	0	0	0	0.347	0	0	0.865	0.932
APBB1IP	FN1	4444696	4441661	9606.ENSP00000365411	9606.ENSP00000346839	0	0	0	0	0	0	0.9	0.348	0.932
NMB	KNG1	4446291	4435537	9606.ENSP00000378089	9606.ENSP00000265023	0	0	0	0	0	0	0.9	0.357	0.932
APLN	KNG1	4447715	4435537	9606.ENSP00000391800	9606.ENSP00000265023	0	0	0	0	0	0	0.9	0.347	0.931
COL4A2	COL8A1	4442382	4434820	9606.ENSP00000353654	9606.ENSP00000261037	0	0	0.392	0.683	0.098	0	0.9	0.584	0.931
VEGFA	HRG	4451310	4433552	9606.ENSP00000478570	9606.ENSP00000232003	0	0	0	0	0.061	0	0.9	0.33	0.931
ALDH6A1	ALDH1B1	4450308	4444922	9606.ENSP00000450436	9606.ENSP00000366927	0	0	0.344	0.76	0.16	0	0.9	0.663	0.931
SERPINA1	PROC	4448813	4433614	9606.ENSP00000416066	9606.ENSP00000234071	0	0	0	0	0.205	0.129	0.9	0.133	0.931
HS6ST2	GPC5	4449504	4444820	9606.ENSP00000429473	9606.ENSP00000366267	0	0	0	0	0.065	0	0.9	0.323	0.931
PC	LDHD	4446208	4437622	9606.ENSP00000377532	9606.ENSP00000300051	0	0	0	0	0.13	0	0.9	0.277	0.931
RUNX3	ITGAL	4446960	4441903	9606.ENSP00000382800	9606.ENSP00000349252	0	0	0	0	0.163	0	0.9	0.244	0.931
CXCL10	C3	4438146	4433951	9606.ENSP00000305651	9606.ENSP00000245907	0	0	0	0	0.088	0	0.9	0.312	0.931
LAMC1	LGALS1	4434618	4432889	9606.ENSP00000258341	9606.ENSP00000215909	0	0	0	0	0.096	0	0.9	0.296	0.93
SERPINA1	EGF	4448813	4435570	9606.ENSP00000416066	9606.ENSP00000265171	0	0	0	0	0	0	0.9	0.331	0.93
SHMT2	AGXT2	4440475	4433532	9606.ENSP00000333667	9606.ENSP00000231420	0.048	0	0	0	0.061	0	0.9	0.31	0.93
CTSS	HLA-DQA1	4443237	4440953	9606.ENSP00000357981	9606.ENSP00000339398	0	0	0	0	0.202	0	0.9	0.195	0.93
GBP1	ICAM1	4443543	4435501	9606.ENSP00000359504	9606.ENSP00000264832	0	0	0	0	0.146	0	0.9	0.246	0.93
VAV1	ITGB2	4451047	4446737	9606.ENSP00000472929	9606.ENSP00000380948	0	0	0	0	0.309	0.305	0.8	0.36	0.93
FABP1	PPARGC1A	4437198	4435507	9606.ENSP00000295834	9606.ENSP00000264867	0	0	0	0	0.065	0	0.9	0.312	0.93
COL4A6	COL5A2	4446339	4444466	9606.ENSP00000378340	9606.ENSP00000364000	0	0	0.433	0.688	0.095	0	0.9	0.519	0.93
COL4A1	COL8A1	4444632	4434820	9606.ENSP00000364979	9606.ENSP00000261037	0	0	0.423	0.721	0.116	0	0.9	0.574	0.93
COL4A1	COL5A3	4444632	4435500	9606.ENSP00000364979	9606.ENSP00000264828	0	0	0.412	0.691	0.115	0	0.9	0.484	0.93
VAV1	AXL	4451047	4437727	9606.ENSP00000472929	9606.ENSP00000301178	0	0	0	0	0.061	0.177	0.9	0.21	0.93
EDN1	PTGER1	4445200	4436972	9606.ENSP00000368683	9606.ENSP00000292513	0	0	0	0	0	0.157	0.9	0.245	0.93
VAV1	FCGR2A	4451047	4435978	9606.ENSP00000472929	9606.ENSP00000271450	0	0	0	0	0.127	0	0.9	0.265	0.93
VAV1	CDH5	4451047	4441389	9606.ENSP00000472929	9606.ENSP00000344115	0	0	0	0	0	0.08	0.9	0.299	0.929
HACL1	ACOX2	4439635	4438346	9606.ENSP00000323811	9606.ENSP00000307697	0	0	0	0	0.098	0	0.9	0.281	0.929
PLAU	ITGA5	4444017	4437011	9606.ENSP00000361850	9606.ENSP00000293379	0	0	0	0	0.18	0	0.9	0.212	0.929
ADCY7	ADORA3	4446306	4443373	9606.ENSP00000378187	9606.ENSP00000358730	0	0	0	0	0.063	0.06	0.9	0.296	0.929
BDKRB2	EDN1	4450312	4445200	9606.ENSP00000450482	9606.ENSP00000368683	0	0	0	0	0.083	0	0.9	0.292	0.929
HLA-B	ICAM1	4448060	4435501	9606.ENSP00000399168	9606.ENSP00000264832	0	0	0	0	0.102	0	0.9	0.28	0.929
CASR	CXCR4	4449096	4447439	9606.ENSP00000420194	9606.ENSP00000386884	0	0	0	0	0	0.057	0.9	0.31	0.929
CASR	EDN1	4449096	4445200	9606.ENSP00000420194	9606.ENSP00000368683	0	0	0	0	0	0	0.9	0.32	0.929
HLA-DPB1	HLA-E	4448476	4444757	9606.ENSP00000408146	9606.ENSP00000365817	0	0	0	0.63	0.11	0.112	0.9	0.499	0.929
HLA-DMA	HLA-DQA1	4444460	4440953	9606.ENSP00000363976	9606.ENSP00000339398	0	0	0	0.728	0.18	0	0.9	0.677	0.929
HLA-B	HLA-DQA1	4448060	4440953	9606.ENSP00000399168	9606.ENSP00000339398	0	0	0	0.596	0	0	0.9	0.737	0.929
HLA-DRA	HLA-F	4446403	4434738	9606.ENSP00000378786	9606.ENSP00000259951	0	0	0	0.616	0.152	0	0.9	0.537	0.929
CCL5	CCL28	4451102	4442460	9606.ENSP00000474412	9606.ENSP00000354416	0	0	0	0	0.067	0.207	0.9	0.143	0.928
PROC	APOB	4433614	4433584	9606.ENSP00000234071	9606.ENSP00000233242	0	0	0	0	0.299	0.05	0.9	0.056	0.928
ABAT	AGXT2	4446571	4433532	9606.ENSP00000379845	9606.ENSP00000231420	0	0	0	0.582	0.086	0	0.9	0.607	0.928
SERPINA5	VWF	4440432	4434871	9606.ENSP00000333203	9606.ENSP00000261405	0	0	0	0	0	0	0.9	0.31	0.928
TNFRSF1B	PSMB9	4444700	4444464	9606.ENSP00000365435	9606.ENSP00000363993	0	0	0	0	0.121	0	0.9	0.252	0.928
GBP2	GBP5	4443541	4443538	9606.ENSP00000359497	9606.ENSP00000359488	0	0	0	0.966	0.644	0	0.8	0.906	0.928
ENPP6	ENPP2	4437330	4434708	9606.ENSP00000296741	9606.ENSP00000259486	0	0	0.384	0.713	0.062	0	0.9	0.643	0.928
CXCL9	CCL28	4442567	4442460	9606.ENSP00000354901	9606.ENSP00000354416	0	0	0	0	0	0.221	0.9	0.157	0.928
BTN3A2	BTN3A1	4441856	4436806	9606.ENSP00000348751	9606.ENSP00000289361	0	0	0	0.98	0.356	0.892	0	0.732	0.928
HLA-DQB1	HLA-F	4444478	4434738	9606.ENSP00000364080	9606.ENSP00000259951	0	0	0	0.612	0.144	0	0.9	0.502	0.927
CD8A	HLA-F	4447395	4434738	9606.ENSP00000386559	9606.ENSP00000259951	0	0	0	0	0.076	0.262	0.9	0.063	0.927
SDSL	AGXT	4447273	4437874	9606.ENSP00000385790	9606.ENSP00000302620	0.147	0	0	0	0.088	0.058	0.9	0.159	0.927
COL4A6	COL1A1	4446339	4433346	9606.ENSP00000378340	9606.ENSP00000225964	0	0	0.398	0.691	0.095	0	0.9	0.456	0.927
GPC3	CSPG4	4446259	4438793	9606.ENSP00000377836	9606.ENSP00000312506	0	0	0	0	0.049	0	0.9	0.298	0.927
HCLS1	FCER1G	4439338	4436828	9606.ENSP00000320176	9606.ENSP00000289902	0	0	0	0	0.306	0	0.9	0	0.927
KIT	EGF	4436763	4435570	9606.ENSP00000288135	9606.ENSP00000265171	0	0	0	0	0	0.062	0.8	0.644	0.927
HLA-DMB	HLA-DQB2	4448054	4447655	9606.ENSP00000398890	9606.ENSP00000390431	0	0	0	0.675	0.163	0	0.9	0.523	0.927
HLA-DRA	GBP2	4446403	4443541	9606.ENSP00000378786	9606.ENSP00000359497	0	0	0	0	0.193	0	0.9	0.169	0.927
VDR	CYP27B1	4450226	4433420	9606.ENSP00000447173	9606.ENSP00000228606	0	0	0	0	0.063	0.133	0	0.917	0.927
CCL28	CXCL10	4442460	4438146	9606.ENSP00000354416	9606.ENSP00000305651	0	0	0	0	0	0.221	0.9	0.146	0.927
CHST15	DCN	4448230	4432629	9606.ENSP00000402394	9606.ENSP00000052754	0	0	0	0	0.061	0	0.9	0.287	0.927
GBP2	ICAM1	4443541	4435501	9606.ENSP00000359497	9606.ENSP00000264832	0	0	0	0	0.149	0	0.9	0.22	0.927
VWF	HRG	4434871	4433552	9606.ENSP00000261405	9606.ENSP00000232003	0	0	0	0	0.06	0	0.9	0.292	0.927
PRLR	ERBB4	4451730	4441238	9606.ENSP00000482954	9606.ENSP00000342235	0	0	0	0	0	0	0.9	0.304	0.927
ITGB2	ITGA5	4446737	4437011	9606.ENSP00000380948	9606.ENSP00000293379	0	0	0	0	0.062	0.382	0.72	0.607	0.927
PDGFD	PLG	4446114	4438461	9606.ENSP00000376865	9606.ENSP00000308938	0	0	0	0	0	0	0.9	0.3	0.927
COL5A2	COL5A3	4444466	4435500	9606.ENSP00000364000	9606.ENSP00000264828	0	0	0.441	0.825	0.143	0	0.9	0.751	0.927
GPC5	CSPG4	4444820	4438793	9606.ENSP00000366267	9606.ENSP00000312506	0	0	0	0	0.049	0	0.9	0.3	0.927
COL5A3	COL8A1	4435500	4434820	9606.ENSP00000264828	9606.ENSP00000261037	0	0	0.431	0.715	0.062	0	0.9	0.541	0.926
HLA-DPB1	HLA-DQB1	4448476	4444478	9606.ENSP00000408146	9606.ENSP00000364080	0	0	0	0.962	0.273	0	0.9	0.894	0.926
TYROBP	SPI1	4435115	4433383	9606.ENSP00000262629	9606.ENSP00000227163	0	0	0	0	0.799	0	0	0.647	0.926
COL4A3	COL1A1	4446565	4433346	9606.ENSP00000379823	9606.ENSP00000225964	0	0	0.422	0.709	0	0	0.9	0.584	0.926
EPHX2	PIPOX	4449539	4439149	9606.ENSP00000430269	9606.ENSP00000317721	0.178	0	0	0	0.064	0	0.9	0.153	0.926
VAV1	CD3D	4451047	4437689	9606.ENSP00000472929	9606.ENSP00000300692	0	0	0	0	0.118	0	0.9	0.236	0.926
CXCR4	KNG1	4447439	4435537	9606.ENSP00000386884	9606.ENSP00000265023	0	0	0	0	0	0	0.9	0.291	0.926
CLDN8	CLDN16	4446957	4435489	9606.ENSP00000382783	9606.ENSP00000264734	0	0	0	0.637	0.061	0	0.9	0.699	0.926
ACADSB	BCKDHB	4443211	4439197	9606.ENSP00000357873	9606.ENSP00000318351	0	0	0	0	0.085	0.064	0.9	0.243	0.926
HLA-DPA1	CTSS	4447805	4443237	9606.ENSP00000393566	9606.ENSP00000357981	0	0	0	0	0.248	0	0.9	0.106	0.926
HLA-DPB1	HLA-F	4448476	4434738	9606.ENSP00000408146	9606.ENSP00000259951	0	0	0	0.639	0.124	0	0.9	0.558	0.926
FOLR3	GGH	4451565	4434748	9606.ENSP00000481114	9606.ENSP00000260118	0	0	0	0	0	0	0.9	0.298	0.926
CXCL12	ADORA3	4446453	4443373	9606.ENSP00000379140	9606.ENSP00000358730	0	0	0	0	0	0.162	0.9	0.194	0.926
PTHLH	GCGR	4450000	4447027	9606.ENSP00000441765	9606.ENSP00000383558	0	0	0	0	0	0	0.9	0.29	0.926
COL4A6	COL8A1	4446339	4434820	9606.ENSP00000378340	9606.ENSP00000261037	0	0	0.42	0.673	0.061	0	0.9	0.438	0.926
HLA-DPB1	CTSS	4448476	4443237	9606.ENSP00000408146	9606.ENSP00000357981	0	0	0	0	0.17	0	0.9	0.178	0.925
HLA-DRA	CD247	4446403	4442542	9606.ENSP00000378786	9606.ENSP00000354782	0	0	0	0	0.13	0	0.9	0.211	0.925
HLA-DQB1	CD3D	4444478	4437689	9606.ENSP00000364080	9606.ENSP00000300692	0	0	0	0	0.104	0	0.9	0.236	0.925
CCL5	KNG1	4451102	4435537	9606.ENSP00000474412	9606.ENSP00000265023	0	0	0	0	0	0	0.9	0.284	0.925
CXCL12	C3	4446453	4433951	9606.ENSP00000379140	9606.ENSP00000245907	0	0	0	0	0.065	0	0.9	0.267	0.925
HLA-DRA	ICAM1	4446403	4435501	9606.ENSP00000378786	9606.ENSP00000264832	0	0	0	0	0.076	0	0.9	0.254	0.925
HAO2	EPHX2	4451782	4449539	9606.ENSP00000483507	9606.ENSP00000430269	0.156	0	0	0	0.062	0	0.9	0.168	0.925
SDSL	CTH	4447273	4443637	9606.ENSP00000385790	9606.ENSP00000359976	0.165	0	0	0	0.081	0	0.8	0.572	0.925
ITGB2	CTGF	4446737	4442998	9606.ENSP00000380948	9606.ENSP00000356954	0	0	0	0	0	0	0.9	0.285	0.925
CYP1B1	IDO1	4451308	4449569	9606.ENSP00000478561	9606.ENSP00000430950	0	0	0	0	0	0	0.9	0.285	0.925
VEGFA	CTGF	4451310	4442998	9606.ENSP00000478570	9606.ENSP00000356954	0	0	0	0	0.062	0.379	0	0.881	0.925
HLA-E	GBP2	4444757	4443541	9606.ENSP00000365817	9606.ENSP00000359497	0	0	0	0	0.213	0	0.9	0.127	0.925
CXCL12	KNG1	4446453	4435537	9606.ENSP00000379140	9606.ENSP00000265023	0	0	0	0	0.061	0	0.9	0.266	0.925
IDO1	DDC	4449569	4448281	9606.ENSP00000430950	9606.ENSP00000403644	0	0	0	0	0	0	0.9	0.283	0.925
CYP27B1	CYP24A1	4433420	4432987	9606.ENSP00000228606	9606.ENSP00000216862	0	0	0.447	0.814	0.061	0	0.9	0.947	0.925
RUNX3	ITGA4	4446960	4446627	9606.ENSP00000382800	9606.ENSP00000380227	0	0	0	0	0.126	0	0.9	0.21	0.924
KNG1	PROC	4435537	4433614	9606.ENSP00000265023	9606.ENSP00000234071	0	0	0	0	0.124	0	0.9	0.205	0.924
HLA-DPA1	GBP2	4447805	4443541	9606.ENSP00000393566	9606.ENSP00000359497	0	0	0	0	0.17	0	0.9	0.161	0.924
CD1D	CD3D	4443056	4437689	9606.ENSP00000357153	9606.ENSP00000300692	0	0	0	0	0.142	0	0.9	0.189	0.924
HLA-DQB2	CTSS	4447655	4443237	9606.ENSP00000390431	9606.ENSP00000357981	0	0	0	0	0.18	0	0.9	0.147	0.924
COL4A4	COL5A2	4446575	4444466	9606.ENSP00000379866	9606.ENSP00000364000	0	0	0.408	0.714	0.061	0	0.9	0.493	0.924
EPHX2	DAO	4449539	4433414	9606.ENSP00000430269	9606.ENSP00000228476	0.178	0	0	0	0.061	0	0.9	0.137	0.924
HLA-DRA	GBP1	4446403	4443543	9606.ENSP00000378786	9606.ENSP00000359504	0	0	0	0	0.137	0	0.9	0.193	0.924
COL4A4	COL8A1	4446575	4434820	9606.ENSP00000379866	9606.ENSP00000261037	0	0	0.417	0.701	0.061	0	0.9	0.459	0.924
NCKAP1L	FCGR2A	4437010	4435978	9606.ENSP00000293373	9606.ENSP00000271450	0	0	0	0	0.272	0	0.9	0	0.924
HLA-DPB1	CD3D	4448476	4437689	9606.ENSP00000408146	9606.ENSP00000300692	0	0	0	0	0.103	0	0.9	0.229	0.924
CLDN10	CLDN16	4437562	4435489	9606.ENSP00000299339	9606.ENSP00000264734	0	0	0	0.635	0	0	0.9	0.694	0.924
CASR	C3	4449096	4433951	9606.ENSP00000420194	9606.ENSP00000245907	0	0	0	0	0	0	0.9	0.262	0.923
BTK	TREM2	4451790	4444111	9606.ENSP00000483570	9606.ENSP00000362205	0	0	0	0	0.095	0	0.9	0.227	0.923
COL4A6	COL5A3	4446339	4435500	9606.ENSP00000378340	9606.ENSP00000264828	0	0	0.405	0.654	0	0	0.9	0.385	0.923
AGXT	SLC27A2	4437874	4435783	9606.ENSP00000302620	9606.ENSP00000267842	0	0	0	0	0.129	0	0.9	0.189	0.923
COL4A6	PLOD2	4446339	4436514	9606.ENSP00000378340	9606.ENSP00000282903	0	0	0	0	0.1	0.185	0.9	0.085	0.923
GZMA	GNLY	4436124	4435328	9606.ENSP00000274306	9606.ENSP00000263863	0	0	0	0	0.778	0	0	0.669	0.923
GPT2	AGXT	4441506	4437874	9606.ENSP00000345282	9606.ENSP00000302620	0.111	0	0	0	0.246	0.112	0.8	0.455	0.923
CYP4A11	FABP1	4438655	4437198	9606.ENSP00000311095	9606.ENSP00000295834	0	0	0	0	0.096	0	0.9	0.224	0.923
ABCG1	SCARB1	4442587	4434927	9606.ENSP00000354995	9606.ENSP00000261693	0	0	0	0	0.061	0	0	0.92	0.923
KNG1	C5	4435537	4433289	9606.ENSP00000265023	9606.ENSP00000223642	0	0	0	0	0.064	0	0.9	0.25	0.923
TYMP	TYMS	4446438	4439011	9606.ENSP00000379038	9606.ENSP00000315644	0.295	0	0	0	0	0	0	0.895	0.923
BDKRB2	PTGER1	4450312	4436972	9606.ENSP00000450482	9606.ENSP00000292513	0	0	0	0	0.066	0	0.9	0.244	0.923
ALDH1B1	BBOX1	4444922	4435209	9606.ENSP00000366927	9606.ENSP00000263182	0	0	0	0	0.073	0.111	0.9	0.177	0.923
ALDH1B1	MAOA	4444922	4441072	9606.ENSP00000366927	9606.ENSP00000340684	0	0	0	0	0	0	0.9	0.269	0.923
PTHLH	ADM	4450000	4449788	9606.ENSP00000441765	9606.ENSP00000436607	0	0	0	0	0	0	0.9	0.265	0.923
FABP5	ACLY	4437379	4434323	9606.ENSP00000297258	9606.ENSP00000253792	0	0	0	0	0.062	0	0.9	0.249	0.923
AGPAT9	GPD1	4451692	4437724	9606.ENSP00000482571	9606.ENSP00000301149	0.07	0	0	0	0.062	0.046	0.9	0.218	0.923
HLA-B	HLA-DMB	4448060	4448054	9606.ENSP00000399168	9606.ENSP00000398890	0	0	0	0.63	0.142	0	0.9	0.388	0.922
LHPP	ATP12A	4443202	4433055	9606.ENSP00000357835	9606.ENSP00000218548	0	0	0	0	0.048	0	0.9	0.251	0.922
ARHGAP22	RAC2	4448652	4434085	9606.ENSP00000412461	9606.ENSP00000249071	0	0	0	0	0.062	0.189	0.9	0.101	0.922
LAMC1	TIMP1	4434618	4433052	9606.ENSP00000258341	9606.ENSP00000218388	0	0	0	0	0.095	0	0.9	0.212	0.922
HACL1	DAO	4439635	4433414	9606.ENSP00000323811	9606.ENSP00000228476	0	0	0	0	0.049	0	0.9	0.254	0.922
CD36	CYBB	4448068	4445083	9606.ENSP00000399421	9606.ENSP00000367851	0	0	0	0	0.151	0	0.9	0.154	0.922
UHRF1	TOP2A	4451406	4448614	9606.ENSP00000479617	9606.ENSP00000411532	0.045	0	0	0	0.773	0.457	0	0.42	0.922
COL5A3	PLOD3	4435500	4433268	9606.ENSP00000264828	9606.ENSP00000223127	0	0	0	0	0.061	0.093	0.9	0.202	0.922
COL4A3	COL8A1	4446565	4434820	9606.ENSP00000379823	9606.ENSP00000261037	0	0	0.425	0.699	0	0	0.9	0.41	0.922
HLA-DQB1	ICAM1	4444478	4435501	9606.ENSP00000364080	9606.ENSP00000264832	0	0	0	0	0	0	0.9	0.257	0.922
CXCL9	C3	4442567	4433951	9606.ENSP00000354901	9606.ENSP00000245907	0	0	0	0	0.09	0	0.9	0.213	0.922
COL4A3	COL5A2	4446565	4444466	9606.ENSP00000379823	9606.ENSP00000364000	0	0	0.416	0.711	0	0	0.9	0.446	0.922
CXCL12	FPR3	4446453	4441189	9606.ENSP00000379140	9606.ENSP00000341821	0	0	0	0	0	0.162	0.9	0.145	0.922
HK2	SORD	4436875	4435781	9606.ENSP00000290573	9606.ENSP00000267814	0	0	0	0	0.079	0	0.9	0.228	0.922
CCL5	C5	4451102	4433289	9606.ENSP00000474412	9606.ENSP00000223642	0	0	0	0	0.054	0	0.9	0.243	0.922
COL4A4	COL1A1	4446575	4433346	9606.ENSP00000379866	9606.ENSP00000225964	0	0	0.387	0.733	0.061	0	0.9	0.475	0.922
FYB	HLA-DRA	4449385	4446403	9606.ENSP00000427114	9606.ENSP00000378786	0	0	0	0	0.22	0	0.9	0.081	0.922
IGFBP3	FSTL3	4445494	4432697	9606.ENSP00000370473	9606.ENSP00000166139	0	0	0	0	0.143	0	0.9	0.163	0.922
VAV1	CD8A	4451047	4447395	9606.ENSP00000472929	9606.ENSP00000386559	0	0	0	0	0.092	0	0.9	0.217	0.922
HLA-E	HLA-DQB1	4444757	4444478	9606.ENSP00000365817	9606.ENSP00000364080	0	0	0	0.628	0.107	0	0.9	0.469	0.922
HLA-DQB2	CD3D	4447655	4437689	9606.ENSP00000390431	9606.ENSP00000300692	0	0	0	0	0.086	0	0.9	0.225	0.922
COL4A4	COL5A3	4446575	4435500	9606.ENSP00000379866	9606.ENSP00000264828	0	0	0.382	0.679	0	0	0.9	0.428	0.922
RUNX3	PSMB9	4446960	4444464	9606.ENSP00000382800	9606.ENSP00000363993	0	0	0	0	0.095	0	0.9	0.21	0.922
CD247	PAG1	4442542	4433123	9606.ENSP00000354782	9606.ENSP00000220597	0	0	0	0	0	0	0.9	0.25	0.921
COL5A3	COL1A1	4435500	4433346	9606.ENSP00000264828	9606.ENSP00000225964	0	0	0.434	0.831	0.118	0	0.9	0.538	0.921
UHRF1	HIST1H2BK	4451406	4441923	9606.ENSP00000479617	9606.ENSP00000349430	0	0	0	0	0.082	0.161	0.9	0.096	0.921
CXCR4	C3	4447439	4433951	9606.ENSP00000386884	9606.ENSP00000245907	0	0	0	0	0	0	0.9	0.244	0.921
EPHX2	ACOX2	4449539	4438346	9606.ENSP00000430269	9606.ENSP00000307697	0	0	0	0	0.085	0	0.9	0.214	0.921
COL23A1	COL8A1	4445902	4434820	9606.ENSP00000375069	9606.ENSP00000261037	0	0	0.44	0.72	0	0	0.9	0.432	0.921
C3	TIMP1	4433951	4433052	9606.ENSP00000245907	9606.ENSP00000218388	0	0	0	0	0	0	0.9	0.249	0.921
KNG1	TIMP1	4435537	4433052	9606.ENSP00000265023	9606.ENSP00000218388	0	0	0	0	0	0	0.9	0.247	0.921
PIPOX	SLC27A2	4439149	4435783	9606.ENSP00000317721	9606.ENSP00000267842	0	0	0	0	0.092	0	0.9	0.2	0.921
IGFBP3	APOB	4445494	4433584	9606.ENSP00000370473	9606.ENSP00000233242	0	0	0	0	0.136	0	0.9	0.163	0.921
ADM	GCGR	4449788	4447027	9606.ENSP00000436607	9606.ENSP00000383558	0	0	0	0	0	0	0.9	0.25	0.921
HLA-DPA1	CD3D	4447805	4437689	9606.ENSP00000393566	9606.ENSP00000300692	0	0	0	0	0.097	0	0.9	0.2	0.921
NEDD4L	KLHL3	4446996	4438782	9606.ENSP00000383199	9606.ENSP00000312397	0	0.001	0	0	0.048	0	0.9	0.244	0.921
CYBB	PLAU	4445083	4444017	9606.ENSP00000367851	9606.ENSP00000361850	0	0	0	0	0.062	0	0.9	0.232	0.921
HADH	ABAT	4451107	4446571	9606.ENSP00000474560	9606.ENSP00000379845	0	0	0	0	0.062	0	0.9	0.229	0.921
ESRP1	FN1	4448377	4441661	9606.ENSP00000405738	9606.ENSP00000346839	0	0	0	0	0	0	0.9	0.244	0.921
CXCL12	PTGER1	4446453	4436972	9606.ENSP00000379140	9606.ENSP00000292513	0	0	0	0	0	0.162	0.9	0.143	0.921
CASR	CXCL12	4449096	4446453	9606.ENSP00000420194	9606.ENSP00000379140	0	0	0	0	0	0	0.9	0.243	0.921
APBB1IP	VWF	4444696	4434871	9606.ENSP00000365411	9606.ENSP00000261405	0	0	0	0	0.061	0	0.9	0.228	0.921
ABAT	CNDP1	4446571	4442175	9606.ENSP00000379845	9606.ENSP00000351682	0.074	0	0	0	0.107	0.086	0.9	0.118	0.921
COL5A2	PLOD3	4444466	4433268	9606.ENSP00000364000	9606.ENSP00000223127	0	0	0	0	0.082	0.17	0.9	0.09	0.921
ALDH1B1	AGXT2	4444922	4433532	9606.ENSP00000366927	9606.ENSP00000231420	0.053	0.002	0	0	0.113	0.126	0.9	0.094	0.921
PDGFD	PLAT	4446114	4433132	9606.ENSP00000376865	9606.ENSP00000220809	0	0	0	0	0.061	0	0.9	0.228	0.921
ASPM	DTL	4442873	4442781	9606.ENSP00000356379	9606.ENSP00000355958	0	0	0	0	0.92	0	0	0	0.92
SLC27A2	DAO	4435783	4433414	9606.ENSP00000267842	9606.ENSP00000228476	0	0	0	0	0.063	0	0.9	0.214	0.92
COL4A6	PLOD3	4446339	4433268	9606.ENSP00000378340	9606.ENSP00000223127	0	0	0	0	0.061	0.185	0.9	0.085	0.92
GBP4	HLA-DQA1	4443540	4440953	9606.ENSP00000359490	9606.ENSP00000339398	0	0	0	0	0.195	0	0.9	0.091	0.92
HLA-DQA1	HLA-F	4440953	4434738	9606.ENSP00000339398	9606.ENSP00000259951	0	0	0	0.606	0.088	0	0.9	0.445	0.92
CCL5	ADORA3	4451102	4443373	9606.ENSP00000474412	9606.ENSP00000358730	0	0	0	0	0	0.05	0.9	0.228	0.92
COL4A4	PLOD2	4446575	4436514	9606.ENSP00000379866	9606.ENSP00000282903	0	0	0	0	0.061	0.185	0.9	0.085	0.92
COL23A1	COL4A2	4445902	4442382	9606.ENSP00000375069	9606.ENSP00000353654	0	0	0.409	0.726	0.061	0	0.9	0.369	0.92
MARVELD2	MARVELD3	4439590	4437615	9606.ENSP00000323264	9606.ENSP00000299952	0	0	0	0	0.225	0	0	0.9	0.92
COL4A4	PLOD3	4446575	4433268	9606.ENSP00000379866	9606.ENSP00000223127	0	0	0	0	0.061	0.185	0.9	0.085	0.92
CTSS	IL10RA	4443237	4433397	9606.ENSP00000357981	9606.ENSP00000227752	0	0	0	0	0.544	0	0.8	0.198	0.92
PIPOX	AGXT2	4439149	4433532	9606.ENSP00000317721	9606.ENSP00000231420	0.074	0	0	0	0.134	0	0.9	0.131	0.92
COL23A1	COL5A3	4445902	4435500	9606.ENSP00000375069	9606.ENSP00000264828	0	0	0.423	0.739	0	0	0.9	0.444	0.92
ADORA3	SUCNR1	4443373	4442617	9606.ENSP00000358730	9606.ENSP00000355156	0	0	0	0	0.102	0	0.9	0.188	0.92
ALB	ABCC3	4437206	4436623	9606.ENSP00000295897	9606.ENSP00000285238	0	0	0	0	0.064	0	0.9	0.213	0.919
FPR3	CXCL10	4441189	4438146	9606.ENSP00000341821	9606.ENSP00000305651	0	0	0	0	0.18	0	0.9	0.093	0.919
APOB	TIMP1	4433584	4433052	9606.ENSP00000233242	9606.ENSP00000218388	0	0	0	0	0.061	0	0.9	0.21	0.919
TNFSF13B	PSMB9	4444645	4444464	9606.ENSP00000365048	9606.ENSP00000363993	0	0	0	0	0.12	0	0.9	0.162	0.919
SEMA5B	PLXND1	4447616	4439102	9606.ENSP00000389588	9606.ENSP00000317128	0	0	0	0	0.055	0.188	0	0.902	0.919
COL4A6	COL23A1	4446339	4445902	9606.ENSP00000378340	9606.ENSP00000375069	0	0	0.41	0.71	0.061	0	0.9	0.286	0.919
HLA-DMB	HLA-E	4448054	4444757	9606.ENSP00000398890	9606.ENSP00000365817	0	0	0	0.631	0.124	0	0.9	0.36	0.919
SIRPA	FCER1G	4446972	4436828	9606.ENSP00000382941	9606.ENSP00000289902	0	0	0	0	0.121	0	0.9	0.153	0.919
SERPINA1	SERPINE1	4448813	4433266	9606.ENSP00000416066	9606.ENSP00000223095	0	0	0.449	0.761	0	0	0.9	0.442	0.919
SERPINA1	TGFA	4448813	4437149	9606.ENSP00000416066	9606.ENSP00000295400	0	0	0	0	0.088	0	0.9	0.187	0.919
HLA-G	HLA-DQB1	4448666	4444478	9606.ENSP00000412927	9606.ENSP00000364080	0	0	0	0.62	0.061	0	0.9	0.497	0.919
PLOD2	COL8A1	4436514	4434820	9606.ENSP00000282903	9606.ENSP00000261037	0	0	0	0	0.104	0	0.9	0.168	0.919
HLA-DPB1	ICAM1	4448476	4435501	9606.ENSP00000408146	9606.ENSP00000264832	0	0	0	0	0	0	0.9	0.231	0.919
PHGDH	PGAM2	4443312	4437386	9606.ENSP00000358417	9606.ENSP00000297283	0	0.02	0	0	0.055	0	0.9	0.218	0.919
FBXL16	FBXO2	4446705	4441603	9606.ENSP00000380746	9606.ENSP00000346240	0	0	0	0	0.23	0	0.9	0.043	0.919
HLA-DQB2	GBP4	4447655	4443540	9606.ENSP00000390431	9606.ENSP00000359490	0	0	0	0	0.097	0	0.9	0.175	0.919
LUM	COL5A3	4435725	4435500	9606.ENSP00000266718	9606.ENSP00000264828	0	0	0	0	0.141	0.082	0.9	0.087	0.918
CCL20	C3	4442174	4433951	9606.ENSP00000351671	9606.ENSP00000245907	0	0	0	0	0.098	0	0.9	0.165	0.918
CHGB	FN1	4445138	4441661	9606.ENSP00000368244	9606.ENSP00000346839	0	0	0	0	0	0	0.9	0.214	0.918
ITGB2	PLAU	4446737	4444017	9606.ENSP00000380948	9606.ENSP00000361850	0	0	0	0	0.063	0	0.9	0.198	0.918
HLA-G	HLA-DPB1	4448666	4448476	9606.ENSP00000412927	9606.ENSP00000408146	0	0	0	0.629	0	0	0.9	0.531	0.918
HLA-B	GBP2	4448060	4443541	9606.ENSP00000399168	9606.ENSP00000359497	0	0	0	0	0.213	0	0.9	0.046	0.918
HLA-G	HLA-DPA1	4448666	4447805	9606.ENSP00000412927	9606.ENSP00000393566	0	0	0	0.594	0	0	0.9	0.483	0.918
HLA-E	TAP1	4444757	4441602	9606.ENSP00000365817	9606.ENSP00000346206	0	0	0	0	0.152	0	0.9	0.114	0.918
CTH	AGXT2	4443637	4433532	9606.ENSP00000359976	9606.ENSP00000231420	0	0	0	0	0.08	0	0.9	0.186	0.918
TRIM22	GBP4	4445296	4443540	9606.ENSP00000369299	9606.ENSP00000359490	0	0	0	0	0.206	0	0.9	0.052	0.918
PDGFD	PLAU	4446114	4444017	9606.ENSP00000376865	9606.ENSP00000361850	0	0	0	0	0	0	0.9	0.214	0.918
CHGB	CP	4445138	4435459	9606.ENSP00000368244	9606.ENSP00000264613	0	0	0	0	0	0	0.9	0.214	0.918
DCXR	SORD	4437953	4435781	9606.ENSP00000303356	9606.ENSP00000267814	0	0	0	0	0.099	0	0.9	0.171	0.918
IFI27	HLA-F	4451772	4434738	9606.ENSP00000483430	9606.ENSP00000259951	0	0	0	0	0.069	0	0.9	0.199	0.918
COL4A4	COL4A1	4446575	4444632	9606.ENSP00000379866	9606.ENSP00000364979	0	0	0.416	0.866	0.062	0	0.9	0.87	0.918
NEDD4L	FBXO2	4446996	4441603	9606.ENSP00000383199	9606.ENSP00000346240	0	0	0	0	0	0	0.9	0.22	0.918
COL4A6	COL4A2	4446339	4442382	9606.ENSP00000378340	9606.ENSP00000353654	0	0	0.407	0.908	0.134	0	0.9	0.692	0.918
ADH1C	AOX1	4449347	4444440	9606.ENSP00000426083	9606.ENSP00000363832	0	0	0	0	0.063	0	0.9	0.203	0.918
COL4A6	COL4A1	4446339	4444632	9606.ENSP00000378340	9606.ENSP00000364979	0	0	0.438	0.879	0.102	0	0.9	0.669	0.918
STC2	FSTL3	4435556	4432697	9606.ENSP00000265087	9606.ENSP00000166139	0	0	0	0	0.098	0	0.9	0.173	0.918
COL4A3	COL4A2	4446565	4442382	9606.ENSP00000379823	9606.ENSP00000353654	0	0	0.411	0.852	0.061	0	0.9	0.763	0.917
LYZ	PYCARD	4434847	4434024	9606.ENSP00000261267	9606.ENSP00000247470	0	0	0	0	0.093	0	0.9	0.164	0.917
GBP1	FCGR1B	4443543	4443305	9606.ENSP00000359504	9606.ENSP00000358391	0	0	0	0	0.097	0	0.9	0.161	0.917
SERPINA1	VCAN	4448813	4435552	9606.ENSP00000416066	9606.ENSP00000265077	0	0	0	0	0	0	0.9	0.206	0.917
NMB	EDN1	4446291	4445200	9606.ENSP00000378089	9606.ENSP00000368683	0	0	0	0	0	0	0.9	0.208	0.917
SERPINA1	IGFBP3	4448813	4445494	9606.ENSP00000416066	9606.ENSP00000370473	0	0	0	0	0.075	0	0.9	0.181	0.917
CP	TIMP1	4435459	4433052	9606.ENSP00000264613	9606.ENSP00000218388	0	0	0	0	0.064	0	0.9	0.186	0.917
LYZ	DOCK2	4434847	4434518	9606.ENSP00000261267	9606.ENSP00000256935	0	0	0	0	0.192	0	0.9	0.058	0.917
HLA-B	HLA-DQB2	4448060	4447655	9606.ENSP00000399168	9606.ENSP00000390431	0	0	0	0.639	0.061	0	0.9	0.469	0.917
IDO1	MAOA	4449569	4441072	9606.ENSP00000430950	9606.ENSP00000340684	0	0	0	0	0	0	0.9	0.211	0.917
VDR	CYP24A1	4450226	4432987	9606.ENSP00000447173	9606.ENSP00000216862	0	0	0	0	0	0.348	0	0.878	0.917
ALDH6A1	AOX1	4450308	4444440	9606.ENSP00000450436	9606.ENSP00000363832	0	0	0	0	0.088	0	0.9	0.171	0.917
VCAN	LAMC1	4435552	4434618	9606.ENSP00000265077	9606.ENSP00000258341	0	0	0	0	0.063	0	0.9	0.188	0.917
IGFBP3	KLK1	4445494	4437758	9606.ENSP00000370473	9606.ENSP00000301420	0	0	0	0	0	0	0.9	0.21	0.917
HLA-G	HLA-DRA	4448666	4446403	9606.ENSP00000412927	9606.ENSP00000378786	0	0	0	0.599	0	0	0.9	0.451	0.917
FN1	STC2	4441661	4435556	9606.ENSP00000346839	9606.ENSP00000265087	0	0	0	0	0.152	0	0.9	0.106	0.917
COL4A3	COL5A3	4446565	4435500	9606.ENSP00000379823	9606.ENSP00000264828	0	0	0.397	0.7	0	0	0.9	0.263	0.917
CDH5	CDH3	4441389	4435356	9606.ENSP00000344115	9606.ENSP00000264012	0	0	0	0.715	0	0	0.9	0.625	0.917
GCGR	QRFPR	4447027	4446272	9606.ENSP00000383558	9606.ENSP00000377948	0	0	0	0	0	0	0.9	0.211	0.917
HLA-DPA1	GBP1	4447805	4443543	9606.ENSP00000393566	9606.ENSP00000359504	0	0	0	0	0.121	0	0.9	0.136	0.917
ADORA3	CXCL10	4443373	4438146	9606.ENSP00000358730	9606.ENSP00000305651	0	0	0	0	0.07	0	0.9	0.187	0.917
IGFBP3	VCAN	4445494	4435552	9606.ENSP00000370473	9606.ENSP00000265077	0	0	0	0	0.061	0	0.9	0.193	0.917
HLA-DQB2	HLA-F	4447655	4434738	9606.ENSP00000390431	9606.ENSP00000259951	0	0	0	0.655	0.084	0	0.9	0.428	0.917
CXCL10	C5	4438146	4433289	9606.ENSP00000305651	9606.ENSP00000223642	0	0	0	0	0.05	0	0.9	0.189	0.916
STC2	VCAN	4435556	4435552	9606.ENSP00000265087	9606.ENSP00000265077	0	0	0	0	0.06	0	0.9	0.187	0.916
COL8A1	PLOD3	4434820	4433268	9606.ENSP00000261037	9606.ENSP00000223127	0	0	0	0	0.049	0	0.9	0.188	0.916
PECAM1	APOB	4450567	4433584	9606.ENSP00000457421	9606.ENSP00000233242	0	0	0	0	0	0	0.9	0.198	0.916
GZMA	GZMK	4436124	4433518	9606.ENSP00000274306	9606.ENSP00000231009	0	0	0.446	0.906	0.907	0	0	0.739	0.916
FPR3	C5	4441189	4433289	9606.ENSP00000341821	9606.ENSP00000223642	0	0	0	0	0	0	0.9	0.202	0.916
TIMP1	FSTL3	4433052	4432697	9606.ENSP00000218388	9606.ENSP00000166139	0	0	0	0	0.101	0	0.9	0.142	0.916
C3	PROC	4433951	4433614	9606.ENSP00000245907	9606.ENSP00000234071	0	0	0	0	0.11	0.05	0.9	0.13	0.916
CCL28	CCL20	4442460	4442174	9606.ENSP00000354416	9606.ENSP00000351671	0	0	0	0	0	0	0.9	0.201	0.916
COL23A1	COL4A1	4445902	4444632	9606.ENSP00000375069	9606.ENSP00000364979	0	0	0.411	0.736	0.061	0	0.9	0.217	0.916
COL4A3	COL4A6	4446565	4446339	9606.ENSP00000379823	9606.ENSP00000378340	0	0	0.419	0.858	0	0	0.9	0.8	0.916
HLA-DQB1	FCGR1B	4444478	4443305	9606.ENSP00000364080	9606.ENSP00000358391	0	0	0	0	0.105	0	0.9	0.139	0.916
GPC3	IGFBP3	4446259	4445494	9606.ENSP00000377836	9606.ENSP00000370473	0	0	0	0	0.096	0	0.9	0.155	0.916
CCL5	FPR3	4451102	4441189	9606.ENSP00000474412	9606.ENSP00000341821	0	0	0	0	0.076	0.05	0.9	0.166	0.916
HLA-E	GBP1	4444757	4443543	9606.ENSP00000365817	9606.ENSP00000359504	0	0	0	0	0.156	0	0.9	0.092	0.916
HAO2	SLC27A2	4451782	4435783	9606.ENSP00000483507	9606.ENSP00000267842	0	0	0	0	0.078	0	0.9	0.164	0.916
SLC15A4	SLC2A3	4435731	4432652	9606.ENSP00000266771	9606.ENSP00000075120	0	0	0	0	0.064	0.086	0.9	0.134	0.916
VEGFA	MYOF	4451310	4442225	9606.ENSP00000478570	9606.ENSP00000352208	0	0	0	0	0.076	0	0.9	0.164	0.916
VCAN	LGALS1	4435552	4432889	9606.ENSP00000265077	9606.ENSP00000215909	0	0	0	0	0.061	0	0.9	0.181	0.916
HADH	AGXT2	4451107	4433532	9606.ENSP00000474560	9606.ENSP00000231420	0	0	0	0	0.063	0	0.9	0.179	0.916
KLHL13	FBXL16	4450072	4446705	9606.ENSP00000443191	9606.ENSP00000380746	0	0	0	0	0.061	0	0.9	0.177	0.916
ADM	PTH1R	4449788	4439492	9606.ENSP00000436607	9606.ENSP00000321999	0	0	0	0	0	0	0.9	0.202	0.916
CDH5	CDH13	4441389	4435831	9606.ENSP00000344115	9606.ENSP00000268613	0	0	0	0.663	0.062	0	0.9	0.451	0.916
HLA-B	HLA-F	4448060	4434738	9606.ENSP00000399168	9606.ENSP00000259951	0	0	0	0.977	0.185	0	0.9	0.701	0.916
ALB	LGALS1	4437206	4432889	9606.ENSP00000295897	9606.ENSP00000215909	0	0	0	0	0	0	0.9	0.196	0.916
COL4A4	COL4A6	4446575	4446339	9606.ENSP00000379866	9606.ENSP00000378340	0	0	0.432	0.888	0.061	0	0.9	0.818	0.915
SH3GL2	HLA-DQA1	4445424	4440953	9606.ENSP00000369981	9606.ENSP00000339398	0	0	0	0	0	0	0.9	0.188	0.915
ADH6	AOX1	4446342	4444440	9606.ENSP00000378359	9606.ENSP00000363832	0	0	0	0	0.063	0	0.9	0.165	0.915
LPAR5	PTGER1	4439960	4436972	9606.ENSP00000327875	9606.ENSP00000292513	0	0	0	0	0.06	0	0.9	0.171	0.915
BDKRB2	ADORA3	4450312	4443373	9606.ENSP00000450482	9606.ENSP00000358730	0	0	0	0	0	0	0.9	0.186	0.915
MOGAT1	PPAPDC1A	4448426	4446797	9606.ENSP00000406674	9606.ENSP00000381302	0	0	0	0	0.061	0	0.9	0.173	0.915
CEP55	ANLN	4443758	4435644	9606.ENSP00000360540	9606.ENSP00000265748	0	0	0	0	0.832	0	0	0.517	0.915
SEMA6D	PLXND1	4439723	4439102	9606.ENSP00000324857	9606.ENSP00000317128	0	0	0	0	0	0.188	0	0.899	0.915
PSMB9	BIRC3	4444464	4435265	9606.ENSP00000363993	9606.ENSP00000263464	0	0	0	0	0.139	0	0.9	0.097	0.915
HK2	GALM	4436875	4436012	9606.ENSP00000290573	9606.ENSP00000272252	0	0	0	0	0.062	0	0.9	0.168	0.915
FOLR3	CTSS	4451565	4443237	9606.ENSP00000481114	9606.ENSP00000357981	0	0	0	0	0.117	0	0.9	0.114	0.915
VIM	TNNT2	4450181	4433670	9606.ENSP00000446007	9606.ENSP00000236918	0	0	0	0	0.063	0	0.9	0.167	0.915
HLA-DQB1	GBP4	4444478	4443540	9606.ENSP00000364080	9606.ENSP00000359490	0	0	0	0	0.12	0	0.9	0.119	0.915
CDH13	CDH6	4435831	4435549	9606.ENSP00000268613	9606.ENSP00000265071	0	0	0	0.659	0.06	0	0.9	0.433	0.915
IGFBP3	C3	4445494	4433951	9606.ENSP00000370473	9606.ENSP00000245907	0	0	0	0	0.091	0	0.9	0.143	0.915
GLDC	PIPOX	4445533	4439149	9606.ENSP00000370737	9606.ENSP00000317721	0	0	0	0	0.082	0	0.9	0.152	0.915
COL4A3	COL23A1	4446565	4445902	9606.ENSP00000379823	9606.ENSP00000375069	0	0	0.42	0.739	0	0	0.9	0.247	0.915
EGF	HRG	4435570	4433552	9606.ENSP00000265171	9606.ENSP00000232003	0	0	0	0	0	0	0.9	0.186	0.915
IGFBP3	LGALS1	4445494	4432889	9606.ENSP00000370473	9606.ENSP00000215909	0	0	0	0	0.098	0	0.9	0.137	0.915
GLDC	DAO	4445533	4433414	9606.ENSP00000370737	9606.ENSP00000228476	0	0	0	0	0.081	0	0.9	0.152	0.915
CXCR4	CCL28	4447439	4442460	9606.ENSP00000386884	9606.ENSP00000354416	0	0	0	0	0	0	0.9	0.186	0.915
CXCR4	PTGER1	4447439	4436972	9606.ENSP00000386884	9606.ENSP00000292513	0	0	0	0	0	0	0.9	0.193	0.915
HLA-DRA	GBP4	4446403	4443540	9606.ENSP00000378786	9606.ENSP00000359490	0	0	0	0	0.113	0	0.9	0.127	0.915
HLA-DPA1	ICAM1	4447805	4435501	9606.ENSP00000393566	9606.ENSP00000264832	0	0	0	0	0.069	0	0.9	0.162	0.915
STC2	LAMC1	4435556	4434618	9606.ENSP00000265087	9606.ENSP00000258341	0	0	0	0	0.175	0	0.9	0.058	0.915
COL4A4	COL23A1	4446575	4445902	9606.ENSP00000379866	9606.ENSP00000375069	0	0	0.385	0.75	0	0	0.9	0.298	0.915
COL23A1	COL1A1	4445902	4433346	9606.ENSP00000375069	9606.ENSP00000225964	0	0	0.426	0.76	0	0	0.9	0.29	0.915
VCAN	APOB	4435552	4433584	9606.ENSP00000265077	9606.ENSP00000233242	0	0	0	0	0	0	0.9	0.187	0.915
ALB	LAMC1	4437206	4434618	9606.ENSP00000295897	9606.ENSP00000258341	0	0	0	0	0	0	0.9	0.189	0.915
HLA-DRA	GBP5	4446403	4443538	9606.ENSP00000378786	9606.ENSP00000359488	0	0	0	0	0.125	0	0.9	0.103	0.914
ACOX2	DAO	4438346	4433414	9606.ENSP00000307697	9606.ENSP00000228476	0	0	0	0	0.061	0	0.9	0.167	0.914
COL4A4	COL4A2	4446575	4442382	9606.ENSP00000379866	9606.ENSP00000353654	0	0	0.403	0.878	0.061	0	0.9	0.743	0.914
HLA-DQB2	FCGR1B	4447655	4443305	9606.ENSP00000390431	9606.ENSP00000358391	0	0	0	0	0.063	0	0.9	0.158	0.914
GBP1	HLA-DQA1	4443543	4440953	9606.ENSP00000359504	9606.ENSP00000339398	0	0	0	0	0.063	0	0.9	0.164	0.914
TRIM22	HLA-DQA1	4445296	4440953	9606.ENSP00000369299	9606.ENSP00000339398	0	0	0	0	0.14	0	0.9	0.085	0.914
GBP1	HLA-F	4443543	4434738	9606.ENSP00000359504	9606.ENSP00000259951	0	0	0	0	0.102	0	0.9	0.125	0.914
HLA-DQA1	CD3D	4440953	4437689	9606.ENSP00000339398	9606.ENSP00000300692	0	0	0	0	0.063	0	0.9	0.163	0.914
G0S2	FABP1	4442792	4437198	9606.ENSP00000355996	9606.ENSP00000295834	0	0	0	0	0.063	0	0.9	0.159	0.914
CHSY3	VCAN	4437877	4435552	9606.ENSP00000302629	9606.ENSP00000265077	0	0	0	0	0.052	0	0.9	0.168	0.914
ALDH1B1	CNDP1	4444922	4442175	9606.ENSP00000366927	9606.ENSP00000351682	0.044	0	0	0	0	0	0.9	0.174	0.914
EDN1	KISS1R	4445200	4433626	9606.ENSP00000368683	9606.ENSP00000234371	0	0	0	0	0	0.157	0.9	0.064	0.914
HLA-DPA1	GBP4	4447805	4443540	9606.ENSP00000393566	9606.ENSP00000359490	0	0	0	0	0.107	0	0.9	0.123	0.914
ADORA3	LPAR5	4443373	4439960	9606.ENSP00000358730	9606.ENSP00000327875	0	0	0	0	0.1	0	0.9	0.124	0.914
ALOX5	CYP4A11	4444382	4438655	9606.ENSP00000363512	9606.ENSP00000311095	0	0	0	0	0	0	0.9	0.176	0.914
GALM	G6PC	4436012	4434327	9606.ENSP00000272252	9606.ENSP00000253801	0	0	0	0	0.063	0	0.9	0.161	0.914
PTHLH	ADCY7	4450000	4446306	9606.ENSP00000441765	9606.ENSP00000378187	0	0	0	0	0	0	0.9	0.181	0.914
C1QB	CSF1R	4438900	4436666	9606.ENSP00000313967	9606.ENSP00000286301	0	0	0	0	0.896	0	0	0.198	0.913
ITGB2	PLG	4446737	4438461	9606.ENSP00000380948	9606.ENSP00000308938	0	0	0	0	0.061	0	0.9	0.156	0.913
RNASET2	GGH	4449364	4434748	9606.ENSP00000426455	9606.ENSP00000260118	0	0	0	0	0.158	0	0.9	0.051	0.913
CHGB	ALB	4445138	4437206	9606.ENSP00000368244	9606.ENSP00000295897	0	0	0	0	0	0	0.9	0.169	0.913
CYBB	NOX4	4445083	4435236	9606.ENSP00000367851	9606.ENSP00000263317	0	0	0	0.874	0.061	0	0.9	0.96	0.913
GPC3	TIMP1	4446259	4433052	9606.ENSP00000377836	9606.ENSP00000218388	0	0	0	0	0	0	0.9	0.171	0.913
ACOT12	ACAT1	4437948	4435651	9606.ENSP00000303246	9606.ENSP00000265838	0.073	0	0	0	0.061	0	0.9	0.128	0.913
BDKRB2	C3	4450312	4433951	9606.ENSP00000450482	9606.ENSP00000245907	0	0	0	0	0.069	0	0.9	0.145	0.913
FN1	DCN	4441661	4432629	9606.ENSP00000346839	9606.ENSP00000052754	0	0	0	0	0.157	0.379	0	0.846	0.913
ICAM1	HLA-F	4435501	4434738	9606.ENSP00000264832	9606.ENSP00000259951	0	0	0	0	0.069	0	0.9	0.146	0.913
APLN	CXCL12	4447715	4446453	9606.ENSP00000391800	9606.ENSP00000379140	0	0	0	0	0	0	0.9	0.171	0.913
CASR	CCL28	4449096	4442460	9606.ENSP00000420194	9606.ENSP00000354416	0	0	0	0	0	0	0.9	0.172	0.913
SUCNR1	FPR3	4442617	4441189	9606.ENSP00000355156	9606.ENSP00000341821	0	0	0	0.645	0.152	0	0.9	0.111	0.913
F3	PLG	4440531	4438461	9606.ENSP00000334145	9606.ENSP00000308938	0	0	0	0	0	0.379	0	0.866	0.913
CTSS	TNFAIP6	4443237	4433852	9606.ENSP00000357981	9606.ENSP00000243347	0	0	0	0	0.085	0	0.9	0.133	0.913
HLA-B	CD3D	4448060	4437689	9606.ENSP00000399168	9606.ENSP00000300692	0	0	0	0	0.088	0	0.9	0.124	0.913
RAB37	RAB25	4446048	4442453	9606.ENSP00000376390	9606.ENSP00000354376	0	0	0.442	0.862	0.049	0.054	0.9	0.433	0.913
COL23A1	COL5A2	4445902	4444466	9606.ENSP00000375069	9606.ENSP00000364000	0	0	0.43	0.745	0.061	0	0.9	0.116	0.913
FBXL16	TRIM9	4446705	4437487	9606.ENSP00000380746	9606.ENSP00000298355	0	0	0	0	0.172	0	0.9	0	0.913
HLA-DRA	FCGR1B	4446403	4443305	9606.ENSP00000378786	9606.ENSP00000358391	0	0	0	0	0.157	0	0.9	0.057	0.913
CXCR4	C5	4447439	4433289	9606.ENSP00000386884	9606.ENSP00000223642	0	0	0	0	0	0	0.9	0.166	0.913
FGF1	FGF9	4451524	4445677	9606.ENSP00000480791	9606.ENSP00000371790	0	0	0	0.846	0.065	0	0.9	0.732	0.913
PYCARD	C3	4434024	4433951	9606.ENSP00000247470	9606.ENSP00000245907	0	0	0	0	0.061	0	0.9	0.151	0.913
SLC12A3	WNK4	4448218	4434005	9606.ENSP00000402152	9606.ENSP00000246914	0	0	0	0	0.062	0.417	0	0.853	0.913
RGS1	CD3D	4442888	4437689	9606.ENSP00000356429	9606.ENSP00000300692	0	0	0	0	0.091	0	0.9	0.128	0.913
CXCL10	KNG1	4438146	4435537	9606.ENSP00000305651	9606.ENSP00000265023	0	0	0	0	0	0	0.9	0.171	0.913
CASR	KNG1	4449096	4435537	9606.ENSP00000420194	9606.ENSP00000265023	0	0	0	0	0	0	0.9	0.172	0.913
IFI27	HLA-B	4451772	4448060	9606.ENSP00000483430	9606.ENSP00000399168	0	0	0	0	0.063	0	0.9	0.15	0.913
IRF6	ISG20	4442789	4438236	9606.ENSP00000355988	9606.ENSP00000306565	0	0	0	0	0	0	0.9	0.174	0.913
AGPAT9	GPD1L	4451692	4436498	9606.ENSP00000482571	9606.ENSP00000282541	0.07	0	0	0	0.062	0.046	0.9	0.122	0.913
MT1G	MT1H	4447689	4440195	9606.ENSP00000391397	9606.ENSP00000330587	0	0	0	0.973	0.912	0	0	0.647	0.913
ADORA3	CXCL9	4443373	4442567	9606.ENSP00000358730	9606.ENSP00000354901	0	0	0	0	0.088	0	0.9	0.122	0.912
AGPAT9	GK	4451692	4448193	9606.ENSP00000482571	9606.ENSP00000401720	0.045	0	0	0	0.062	0.05	0.9	0.128	0.912
HLA-G	CD3D	4448666	4437689	9606.ENSP00000412927	9606.ENSP00000300692	0	0	0	0	0	0	0.9	0.165	0.912
QRFPR	KISS1R	4446272	4433626	9606.ENSP00000377948	9606.ENSP00000234371	0	0	0	0.706	0	0	0.9	0.462	0.912
CASR	ADORA3	4449096	4443373	9606.ENSP00000420194	9606.ENSP00000358730	0	0	0	0	0	0.057	0.9	0.151	0.912
TGFBI	ITGB2	4448825	4446737	9606.ENSP00000416330	9606.ENSP00000380948	0	0	0	0	0.063	0	0.9	0.144	0.912
HSPA2	LMNB1	4446310	4434861	9606.ENSP00000378199	9606.ENSP00000261366	0	0	0	0	0	0	0.9	0.162	0.912
RGS1	CD247	4442888	4442542	9606.ENSP00000356429	9606.ENSP00000354782	0	0	0	0	0.109	0	0.9	0.1	0.912
GCAT	PIPOX	4445585	4439149	9606.ENSP00000371110	9606.ENSP00000317721	0.052	0	0	0	0.062	0	0.9	0.128	0.912
LAPTM5	SPI1	4437079	4433383	9606.ENSP00000294507	9606.ENSP00000227163	0	0	0	0	0.909	0	0	0.079	0.912
ADCY7	PTH1R	4446306	4439492	9606.ENSP00000378187	9606.ENSP00000321999	0	0	0	0	0.051	0.092	0.9	0.106	0.912
BDKRB2	APLN	4450312	4447715	9606.ENSP00000450482	9606.ENSP00000391800	0	0	0	0	0.06	0	0.9	0.145	0.912
IGFBP3	LAMC1	4445494	4434618	9606.ENSP00000370473	9606.ENSP00000258341	0	0	0	0	0.152	0	0.9	0.05	0.912
EPHX2	HACL1	4449539	4439635	9606.ENSP00000430269	9606.ENSP00000323811	0	0	0	0	0.062	0	0.9	0.145	0.912
CYP2J2	PTGS1	4443694	4442503	9606.ENSP00000360247	9606.ENSP00000354612	0	0	0	0	0.055	0	0.9	0.149	0.912
SIRPA	ITGB2	4446972	4446737	9606.ENSP00000382941	9606.ENSP00000380948	0	0	0	0	0.108	0	0.9	0.093	0.912
GCGR	PTH1R	4447027	4439492	9606.ENSP00000383558	9606.ENSP00000321999	0	0	0	0.806	0.063	0	0.9	0.568	0.912
HLA-G	HLA-DQB2	4448666	4447655	9606.ENSP00000412927	9606.ENSP00000390431	0	0	0	0.657	0.061	0	0.9	0.343	0.912
IFI27	HLA-G	4451772	4448666	9606.ENSP00000483430	9606.ENSP00000412927	0	0	0	0	0	0	0.9	0.162	0.912
PLAU	HRG	4444017	4433552	9606.ENSP00000361850	9606.ENSP00000232003	0	0	0	0	0	0	0.9	0.164	0.912
BDKRB2	ADCY7	4450312	4446306	9606.ENSP00000450482	9606.ENSP00000378187	0	0	0	0	0	0	0.9	0.158	0.912
CTSS	C1QB	4443237	4438900	9606.ENSP00000357981	9606.ENSP00000313967	0	0	0	0	0.848	0	0	0.444	0.912
TNFRSF1B	PLAU	4444700	4444017	9606.ENSP00000365435	9606.ENSP00000361850	0	0	0	0	0.061	0	0.9	0.14	0.912
APLN	CCL28	4447715	4442460	9606.ENSP00000391800	9606.ENSP00000354416	0	0	0	0	0	0	0.9	0.161	0.912
CD3D	HLA-F	4437689	4434738	9606.ENSP00000300692	9606.ENSP00000259951	0	0	0	0	0.07	0	0.9	0.139	0.912
HSPA2	NR3C2	4446310	4442077	9606.ENSP00000378199	9606.ENSP00000350815	0	0	0	0	0	0.109	0.9	0.101	0.912
HACL1	SLC27A2	4439635	4435783	9606.ENSP00000323811	9606.ENSP00000267842	0	0	0	0	0.064	0	0.9	0.138	0.912
HLA-DQA1	LAG3	4440953	4432798	9606.ENSP00000339398	9606.ENSP00000203629	0	0	0	0	0.061	0	0.9	0.142	0.912
GCAT	AGXT2	4445585	4433532	9606.ENSP00000371110	9606.ENSP00000231420	0	0	0	0	0.062	0	0.9	0.127	0.911
DUSP9	DUSP1	4441564	4433734	9606.ENSP00000345853	9606.ENSP00000239223	0	0	0	0.78	0	0	0.9	0.559	0.911
BDKRB2	C5	4450312	4433289	9606.ENSP00000450482	9606.ENSP00000223642	0	0	0	0	0	0	0.9	0.156	0.911
GPC5	APOB	4444820	4433584	9606.ENSP00000366267	9606.ENSP00000233242	0	0	0	0	0	0.133	0.9	0.066	0.911
LCP1	SPI1	4446831	4433383	9606.ENSP00000381581	9606.ENSP00000227163	0	0	0	0	0.551	0	0	0.81	0.911
HIST1H2BK	LMNB1	4441923	4434861	9606.ENSP00000349430	9606.ENSP00000261366	0	0	0	0	0.076	0	0.9	0.115	0.911
CASR	GPR4	4449096	4439307	9606.ENSP00000420194	9606.ENSP00000319744	0	0	0	0	0	0	0.9	0.153	0.911
CDH4	CDH6	4451902	4435549	9606.ENSP00000484928	9606.ENSP00000265071	0	0	0	0.826	0	0	0.9	0.678	0.911
COL4A3	PLOD2	4446565	4436514	9606.ENSP00000379823	9606.ENSP00000282903	0	0	0	0	0.061	0.093	0.9	0.088	0.911
SIRPA	TYROBP	4446972	4435115	9606.ENSP00000382941	9606.ENSP00000262629	0	0	0	0	0.227	0	0.8	0.475	0.911
CHRDL1	TIMP1	4443870	4433052	9606.ENSP00000361112	9606.ENSP00000218388	0	0	0	0	0.063	0	0.9	0.13	0.911
LGALS1	FSTL3	4432889	4432697	9606.ENSP00000215909	9606.ENSP00000166139	0	0	0	0	0.147	0	0.9	0	0.911
SCG2	KNG1	4438023	4435537	9606.ENSP00000304133	9606.ENSP00000265023	0	0	0	0	0	0	0.9	0.156	0.911
HLA-DRA	TRIM22	4446403	4445296	9606.ENSP00000378786	9606.ENSP00000369299	0	0	0	0	0.087	0	0.9	0.111	0.911
RAB37	RAB42	4446048	4444267	9606.ENSP00000376390	9606.ENSP00000362932	0	0	0	0.765	0.061	0.082	0.9	0.265	0.911
SERPINA1	GPC3	4448813	4446259	9606.ENSP00000416066	9606.ENSP00000377836	0	0	0	0	0	0	0.9	0.152	0.911
SUCNR1	LPAR5	4442617	4439960	9606.ENSP00000355156	9606.ENSP00000327875	0	0	0	0.644	0.066	0	0.9	0.287	0.911
FPR3	C3	4441189	4433951	9606.ENSP00000341821	9606.ENSP00000245907	0	0	0	0	0.09	0	0.9	0.11	0.911
EPHX2	SLC27A2	4449539	4435783	9606.ENSP00000430269	9606.ENSP00000267842	0	0	0	0	0.081	0.084	0.9	0.075	0.911
ASB9	TRIM63	4445400	4444355	9606.ENSP00000369855	9606.ENSP00000363390	0	0	0	0	0.057	0.079	0.9	0.097	0.911
CP	LGALS1	4435459	4432889	9606.ENSP00000264613	9606.ENSP00000215909	0	0	0	0	0.061	0	0.9	0.132	0.911
CLDN8	CLDN10	4446957	4437562	9606.ENSP00000382783	9606.ENSP00000299339	0	0	0	0.839	0.062	0	0.9	0.63	0.911
COL4A6	ENPP1	4446339	4442442	9606.ENSP00000378340	9606.ENSP00000354238	0	0	0	0	0	0	0.9	0.147	0.911
GCAT	DAO	4445585	4433414	9606.ENSP00000371110	9606.ENSP00000228476	0.052	0	0	0	0.056	0	0.9	0.128	0.911
ABAT	AOX1	4446571	4444440	9606.ENSP00000379845	9606.ENSP00000363832	0	0	0	0	0.063	0	0.9	0.133	0.911
HLA-DQB2	HLA-E	4447655	4444757	9606.ENSP00000390431	9606.ENSP00000365817	0	0	0	0.666	0.061	0	0.9	0.33	0.911
COL4A3	COL4A1	4446565	4444632	9606.ENSP00000379823	9606.ENSP00000364979	0	0	0.421	0.912	0.061	0	0.9	0.709	0.911
HLA-DQB2	HLA-DQB1	4447655	4444478	9606.ENSP00000390431	9606.ENSP00000364080	0	0	0	0.974	0.138	0	0.9	0.676	0.911
SCG2	ALB	4438023	4437206	9606.ENSP00000304133	9606.ENSP00000295897	0	0	0	0	0.062	0	0.9	0.135	0.911
CXCL9	KNG1	4442567	4435537	9606.ENSP00000354901	9606.ENSP00000265023	0	0	0	0	0.052	0	0.9	0.138	0.911
PTGS1	CYP4F3	4442503	4433149	9606.ENSP00000354612	9606.ENSP00000221307	0	0	0	0	0.05	0	0.9	0.144	0.911
IL4I1	DDC	4451032	4448281	9606.ENSP00000472474	9606.ENSP00000403644	0	0	0	0	0.063	0	0.9	0.127	0.911
HLA-DQB1	GBP1	4444478	4443543	9606.ENSP00000364080	9606.ENSP00000359504	0	0	0	0	0.064	0	0.9	0.13	0.911
CD36	GZMA	4448068	4436124	9606.ENSP00000399421	9606.ENSP00000274306	0	0	0	0	0.142	0	0.9	0	0.91
LPCAT1	PLA2G7	4436543	4436162	9606.ENSP00000283415	9606.ENSP00000274793	0	0	0	0	0.061	0	0.8	0.56	0.91
NLGN1	EPB41L5	4447753	4435304	9606.ENSP00000392500	9606.ENSP00000263713	0	0	0	0	0.049	0	0.9	0.13	0.91
IL4I1	MAOA	4451032	4441072	9606.ENSP00000472474	9606.ENSP00000340684	0	0	0	0.589	0	0	0.9	0.287	0.91
LAMC1	C3	4434618	4433951	9606.ENSP00000258341	9606.ENSP00000245907	0	0	0	0	0	0	0.9	0.138	0.91
GCGR	KNG1	4447027	4435537	9606.ENSP00000383558	9606.ENSP00000265023	0	0	0	0	0.126	0	0.9	0.052	0.91
COL4A3	LUM	4446565	4435725	9606.ENSP00000379823	9606.ENSP00000266718	0	0	0	0	0	0.082	0.9	0.1	0.91
SLC5A12	SLC22A12	4446484	4444903	9606.ENSP00000379326	9606.ENSP00000366797	0	0	0	0	0.064	0.051	0	0.907	0.91
CHSY3	DCN	4437877	4432629	9606.ENSP00000302629	9606.ENSP00000052754	0	0	0	0	0.065	0	0.9	0.117	0.91
HLA-DPA1	FCGR1B	4447805	4443305	9606.ENSP00000393566	9606.ENSP00000358391	0	0	0	0	0.121	0	0.9	0.06	0.91
HLA-DQB2	LAG3	4447655	4432798	9606.ENSP00000390431	9606.ENSP00000203629	0	0	0	0	0.061	0	0.9	0.127	0.91
FGF9	FLRT3	4445677	4444993	9606.ENSP00000371790	9606.ENSP00000367292	0	0	0	0	0	0.05	0.9	0.135	0.91
CHGB	KNG1	4445138	4435537	9606.ENSP00000368244	9606.ENSP00000265023	0	0	0	0	0	0	0.9	0.14	0.91
HLA-B	ISG20	4448060	4438236	9606.ENSP00000399168	9606.ENSP00000306565	0	0	0	0	0.076	0	0.9	0.108	0.91
CXCL9	C5	4442567	4433289	9606.ENSP00000354901	9606.ENSP00000223642	0	0	0	0	0.054	0	0.9	0.125	0.91
GBP2	HLA-DQA1	4443541	4440953	9606.ENSP00000359497	9606.ENSP00000339398	0	0	0	0	0.063	0	0.9	0.119	0.91
LAPTM5	CD53	4437079	4435973	9606.ENSP00000294507	9606.ENSP00000271324	0	0	0	0	0.816	0	0	0.532	0.91
IL4I1	HPD	4451032	4436793	9606.ENSP00000472474	9606.ENSP00000289004	0.053	0	0	0	0	0	0.9	0.126	0.91
CXCL12	C5	4446453	4433289	9606.ENSP00000379140	9606.ENSP00000223642	0	0	0	0	0	0	0.9	0.146	0.91
CDH6	CDH3	4435549	4435356	9606.ENSP00000265071	9606.ENSP00000264012	0	0	0	0.781	0	0	0.9	0.479	0.91
GATA3	HIST1H2BK	4445191	4441923	9606.ENSP00000368632	9606.ENSP00000349430	0	0	0	0	0	0.131	0.9	0	0.909
TOP2A	LMNB1	4448614	4434861	9606.ENSP00000411532	9606.ENSP00000261366	0	0	0	0	0.885	0.069	0	0.221	0.909
CD36	SLC2A3	4448068	4432652	9606.ENSP00000399421	9606.ENSP00000075120	0	0	0	0	0	0	0.9	0.128	0.909
KCNJ10	KCNJ2	4443029	4433856	9606.ENSP00000357068	9606.ENSP00000243457	0	0	0.443	0.894	0	0	0.9	0.491	0.909
CD36	ITGAL	4448068	4441903	9606.ENSP00000399421	9606.ENSP00000349252	0	0	0	0	0.106	0	0.9	0.064	0.909
PSMB9	EGLN3	4444464	4434133	9606.ENSP00000363993	9606.ENSP00000250457	0	0	0	0	0	0	0.9	0.13	0.909
CDH4	CDH13	4451902	4435831	9606.ENSP00000484928	9606.ENSP00000268613	0	0	0	0.865	0.061	0	0.9	0.574	0.909
CCL28	LPAR5	4442460	4439960	9606.ENSP00000354416	9606.ENSP00000327875	0	0	0	0	0	0	0.9	0.129	0.909
IL4I1	ASS1	4451032	4443929	9606.ENSP00000472474	9606.ENSP00000361471	0	0	0	0	0	0	0.9	0.128	0.909
CXCR4	FPR3	4447439	4441189	9606.ENSP00000386884	9606.ENSP00000341821	0	0	0	0.761	0.07	0	0.9	0.292	0.909
KLHL13	KLHL3	4450072	4438782	9606.ENSP00000443191	9606.ENSP00000312397	0	0	0	0.787	0.064	0	0.9	0.347	0.909
CD36	ITGB2	4448068	4446737	9606.ENSP00000399421	9606.ENSP00000380948	0	0	0	0	0.122	0	0.9	0.048	0.909
CYP4A11	CYP4F3	4438655	4433149	9606.ENSP00000311095	9606.ENSP00000221307	0	0	0.447	0.914	0	0	0.9	0.758	0.909
LY96	BIRC3	4436604	4435265	9606.ENSP00000284818	9606.ENSP00000263464	0	0	0	0	0.088	0	0.9	0.083	0.909
FABP1	TRIB3	4437198	4433006	9606.ENSP00000295834	9606.ENSP00000217233	0	0	0	0	0	0	0.9	0.132	0.909
BTK	HLA-E	4451790	4444757	9606.ENSP00000483570	9606.ENSP00000365817	0	0	0	0	0.124	0.05	0.9	0	0.909
HLA-DQB1	GBP5	4444478	4443538	9606.ENSP00000364080	9606.ENSP00000359488	0	0	0	0	0.118	0	0.9	0.058	0.909
HLA-G	GBP2	4448666	4443541	9606.ENSP00000412927	9606.ENSP00000359497	0	0	0	0	0.06	0	0.9	0.112	0.909
GBP2	HLA-F	4443541	4434738	9606.ENSP00000359497	9606.ENSP00000259951	0	0	0	0	0.128	0	0.9	0	0.909
SIRPA	CYBB	4446972	4445083	9606.ENSP00000382941	9606.ENSP00000367851	0	0	0	0	0.119	0	0.9	0.051	0.909
CTSS	GGH	4443237	4434748	9606.ENSP00000357981	9606.ENSP00000260118	0	0	0	0	0.112	0	0.9	0.062	0.909
VAV1	CYFIP2	4451047	4450126	9606.ENSP00000472929	9606.ENSP00000444645	0	0	0	0	0.078	0	0.9	0.093	0.909
PLOD2	COL5A3	4436514	4435500	9606.ENSP00000282903	9606.ENSP00000264828	0	0	0	0	0.061	0.093	0.9	0.067	0.909
PLAU	SLC2A3	4444017	4432652	9606.ENSP00000361850	9606.ENSP00000075120	0	0	0	0	0.062	0	0.9	0.111	0.909
COL4A6	LUM	4446339	4435725	9606.ENSP00000378340	9606.ENSP00000266718	0	0	0	0	0.086	0.082	0.9	0.046	0.909
GBP5	HLA-F	4443538	4434738	9606.ENSP00000359488	9606.ENSP00000259951	0	0	0	0	0.111	0	0.9	0.068	0.909
HLA-DQB2	GBP2	4447655	4443541	9606.ENSP00000390431	9606.ENSP00000359497	0	0	0	0	0.064	0	0.9	0.11	0.909
PIGR	ACPP	4441870	4439571	9606.ENSP00000348888	9606.ENSP00000323036	0	0	0	0	0.062	0	0.9	0.113	0.909
GPC3	LAMC1	4446259	4434618	9606.ENSP00000377836	9606.ENSP00000258341	0	0	0	0	0.076	0	0.9	0.104	0.909
CD3D	PAG1	4437689	4433123	9606.ENSP00000300692	9606.ENSP00000220597	0	0	0	0	0	0	0.9	0.129	0.909
HLA-DRA	LAG3	4446403	4432798	9606.ENSP00000378786	9606.ENSP00000203629	0	0	0	0	0.062	0	0.9	0.11	0.909
HLA-E	CD3D	4444757	4437689	9606.ENSP00000365817	9606.ENSP00000300692	0	0	0	0	0.088	0	0.9	0.083	0.909
CDH4	CDH5	4451902	4441389	9606.ENSP00000484928	9606.ENSP00000344115	0	0	0	0.777	0	0	0.9	0.439	0.909
CLDN10	CLDN19	4437562	4437271	9606.ENSP00000299339	9606.ENSP00000296387	0	0	0	0.883	0	0	0.9	0.702	0.908
CYP4A11	ALDH1A2	4438655	4434106	9606.ENSP00000311095	9606.ENSP00000249750	0	0	0	0	0.063	0.085	0.9	0.056	0.908
PTGS1	CYP4A11	4442503	4438655	9606.ENSP00000354612	9606.ENSP00000311095	0	0	0	0	0.05	0	0.9	0.117	0.908
HLA-DRA	PAG1	4446403	4433123	9606.ENSP00000378786	9606.ENSP00000220597	0	0	0	0	0.065	0	0.9	0.096	0.908
HLA-DPB1	GBP2	4448476	4443541	9606.ENSP00000408146	9606.ENSP00000359497	0	0	0	0	0.108	0	0.9	0.055	0.908
CDH13	CDH3	4435831	4435356	9606.ENSP00000268613	9606.ENSP00000264012	0	0	0	0.802	0	0	0.9	0.429	0.908
HLA-DQB1	LAG3	4444478	4432798	9606.ENSP00000364080	9606.ENSP00000203629	0	0	0	0	0.06	0	0.9	0.101	0.908
DPT	DCN	4442962	4432629	9606.ENSP00000356791	9606.ENSP00000052754	0	0	0	0	0.531	0.379	0	0.711	0.908
HLA-DQB2	GBP1	4447655	4443543	9606.ENSP00000390431	9606.ENSP00000359504	0	0	0	0	0.064	0	0.9	0.096	0.908
CD3D	APOB	4437689	4433584	9606.ENSP00000300692	9606.ENSP00000233242	0	0	0	0	0.123	0	0.9	0	0.908
IL4I1	IDO1	4451032	4449569	9606.ENSP00000472474	9606.ENSP00000430950	0	0	0	0	0.075	0	0.9	0.093	0.908
HLA-DQB1	GBP2	4444478	4443541	9606.ENSP00000364080	9606.ENSP00000359497	0	0	0	0	0.098	0	0.9	0.068	0.908
KNG1	KISS1R	4435537	4433626	9606.ENSP00000265023	9606.ENSP00000234371	0	0	0	0	0	0	0.9	0.125	0.908
HLA-DPB1	GBP5	4448476	4443538	9606.ENSP00000408146	9606.ENSP00000359488	0	0	0	0	0.118	0	0.9	0	0.908
ITGB2	SLC15A4	4446737	4435731	9606.ENSP00000380948	9606.ENSP00000266771	0	0	0	0	0.061	0	0.9	0.105	0.908
CTH	BCKDHB	4443637	4439197	9606.ENSP00000359976	9606.ENSP00000318351	0	0	0	0	0.111	0	0.9	0.057	0.908
LYZ	TNFAIP6	4434847	4433852	9606.ENSP00000261267	9606.ENSP00000243347	0	0	0	0	0.078	0	0.9	0.083	0.908
GBP2	FCGR1B	4443541	4443305	9606.ENSP00000359497	9606.ENSP00000358391	0	0	0	0	0.118	0	0.9	0	0.908
COL4A4	LUM	4446575	4435725	9606.ENSP00000379866	9606.ENSP00000266718	0	0	0	0	0.063	0.082	0.9	0.064	0.908
SUCNR1	CXCL10	4442617	4438146	9606.ENSP00000355156	9606.ENSP00000305651	0	0	0	0	0.118	0	0.9	0	0.908
CCL28	KNG1	4442460	4435537	9606.ENSP00000354416	9606.ENSP00000265023	0	0	0	0	0	0	0.9	0.119	0.908
FOLR3	LYZ	4451565	4434847	9606.ENSP00000481114	9606.ENSP00000261267	0	0	0	0	0.102	0	0.9	0.059	0.908
BDKRB2	NMB	4450312	4446291	9606.ENSP00000450482	9606.ENSP00000378089	0	0	0	0	0	0	0.9	0.125	0.908
CLDN8	CLDN19	4446957	4437271	9606.ENSP00000382783	9606.ENSP00000296387	0	0	0	0.89	0.061	0	0.9	0.636	0.908
GBP5	ICAM1	4443538	4435501	9606.ENSP00000359488	9606.ENSP00000264832	0	0	0	0	0.069	0	0.9	0.096	0.908
FOLR3	TNFAIP6	4451565	4433852	9606.ENSP00000481114	9606.ENSP00000243347	0	0	0	0	0.127	0	0.9	0	0.908
SLC27A2	SLC2A3	4435783	4432652	9606.ENSP00000267842	9606.ENSP00000075120	0	0	0	0	0.054	0	0.9	0.106	0.908
RNASET2	LYZ	4449364	4434847	9606.ENSP00000426455	9606.ENSP00000261267	0	0	0	0	0.104	0	0.9	0.057	0.908
GPC3	STC2	4446259	4435556	9606.ENSP00000377836	9606.ENSP00000265087	0	0	0	0	0.077	0	0.9	0.089	0.908
LYZ	GGH	4434847	4434748	9606.ENSP00000261267	9606.ENSP00000260118	0	0	0	0	0.051	0	0.9	0.111	0.908
EDN1	GPR4	4445200	4439307	9606.ENSP00000368683	9606.ENSP00000319744	0	0	0	0	0	0	0.9	0.118	0.908
SIRPA	PLAU	4446972	4444017	9606.ENSP00000382941	9606.ENSP00000361850	0	0	0	0	0	0	0.9	0.109	0.907
GPC3	CHRDL1	4446259	4443870	9606.ENSP00000377836	9606.ENSP00000361112	0	0	0	0	0.061	0	0.9	0.091	0.907
QPRT	ENPP1	4446401	4442442	9606.ENSP00000378782	9606.ENSP00000354238	0	0	0	0	0.061	0	0.9	0.091	0.907
IGFBP3	GZMH	4445494	4432949	9606.ENSP00000370473	9606.ENSP00000216338	0	0	0	0	0	0	0.9	0.116	0.907
HLA-DPA1	LAG3	4447805	4432798	9606.ENSP00000393566	9606.ENSP00000203629	0	0	0	0	0.084	0	0.9	0.072	0.907
VCAN	KNG1	4435552	4435537	9606.ENSP00000265077	9606.ENSP00000265023	0	0	0	0	0	0	0.9	0.114	0.907
CD36	TNFRSF1B	4448068	4444700	9606.ENSP00000399421	9606.ENSP00000365435	0	0	0	0	0.106	0	0.9	0.045	0.907
CHST15	CSPG4	4448230	4438793	9606.ENSP00000402394	9606.ENSP00000312506	0	0	0	0	0	0	0.9	0.111	0.907
AOX1	CYP4A11	4444440	4438655	9606.ENSP00000363832	9606.ENSP00000311095	0	0	0	0	0.066	0	0.9	0.084	0.907
SDSL	BCKDHB	4447273	4439197	9606.ENSP00000385790	9606.ENSP00000318351	0	0	0	0	0.065	0	0.9	0.089	0.907
FGF1	FLRT3	4451524	4444993	9606.ENSP00000480791	9606.ENSP00000367292	0	0	0	0	0.065	0.05	0.9	0.078	0.907
GBP4	TRIM2	4443540	4440975	9606.ENSP00000359490	9606.ENSP00000339659	0	0	0	0	0	0	0.9	0.116	0.907
HLA-DPB1	HLA-DQB2	4448476	4447655	9606.ENSP00000408146	9606.ENSP00000390431	0	0	0	0.957	0.088	0	0.9	0.677	0.907
IGFBP3	KNG1	4445494	4435537	9606.ENSP00000370473	9606.ENSP00000265023	0	0	0	0	0.049	0	0.9	0.107	0.907
KCNJ1	WNK4	4446057	4434005	9606.ENSP00000376432	9606.ENSP00000246914	0	0	0	0	0	0.299	0	0.873	0.907
ITGB2	RAB37	4446737	4446048	9606.ENSP00000380948	9606.ENSP00000376390	0	0	0	0	0.111	0	0.9	0	0.907
PTGER1	KISS1R	4436972	4433626	9606.ENSP00000292513	9606.ENSP00000234371	0	0	0	0	0.061	0	0.9	0.094	0.907
BCKDHB	SDS	4439197	4434551	9606.ENSP00000318351	9606.ENSP00000257549	0	0	0	0	0.062	0	0.9	0.089	0.907
HLA-DPB1	GBP4	4448476	4443540	9606.ENSP00000408146	9606.ENSP00000359490	0	0	0	0	0.108	0	0.9	0.041	0.907
GPC3	FSTL3	4446259	4432697	9606.ENSP00000377836	9606.ENSP00000166139	0	0	0	0	0.056	0	0.9	0.097	0.907
SUCNR1	CXCL9	4442617	4442567	9606.ENSP00000355156	9606.ENSP00000354901	0	0	0	0	0.112	0	0.9	0	0.907
SCNN1B	SCN4B	4441549	4439529	9606.ENSP00000345751	9606.ENSP00000322460	0	0	0	0	0.062	0	0.9	0.094	0.907
HLA-DPA1	PAG1	4447805	4433123	9606.ENSP00000393566	9606.ENSP00000220597	0	0	0	0	0.069	0	0.9	0.088	0.907
HLA-DPA1	GBP5	4447805	4443538	9606.ENSP00000393566	9606.ENSP00000359488	0	0	0	0	0.112	0	0.9	0.047	0.907
FBXO2	TRIM9	4441603	4437487	9606.ENSP00000346240	9606.ENSP00000298355	0	0	0	0	0.11	0	0.9	0	0.907
BDKRB2	CXCL12	4450312	4446453	9606.ENSP00000450482	9606.ENSP00000379140	0	0	0	0	0.098	0	0.9	0.053	0.907
RUNX3	CTGF	4446960	4442998	9606.ENSP00000382800	9606.ENSP00000356954	0	0	0	0	0	0	0.9	0.112	0.907
RNASET2	PYCARD	4449364	4434024	9606.ENSP00000426455	9606.ENSP00000247470	0	0	0	0	0.116	0	0.9	0	0.907
KNG1	SPARC	4435537	4433520	9606.ENSP00000265023	9606.ENSP00000231061	0	0	0	0	0	0	0.9	0.112	0.907
PSMB9	CCND1	4444464	4433391	9606.ENSP00000363993	9606.ENSP00000227507	0	0	0	0	0	0	0.9	0.111	0.907
IGFBP3	CP	4445494	4435459	9606.ENSP00000370473	9606.ENSP00000264613	0	0	0	0	0.076	0	0.9	0.076	0.907
ADCY7	KNG1	4446306	4435537	9606.ENSP00000378187	9606.ENSP00000265023	0	0	0	0	0	0	0.9	0.11	0.907
HLA-DPB1	IRF6	4448476	4442789	9606.ENSP00000408146	9606.ENSP00000355988	0	0	0	0	0.06	0	0.9	0.096	0.907
SLIT2	PFN2	4449223	4433759	9606.ENSP00000422591	9606.ENSP00000239940	0	0	0	0	0.111	0	0.9	0	0.907
ALB	FSTL3	4437206	4432697	9606.ENSP00000295897	9606.ENSP00000166139	0	0	0	0	0	0	0.9	0.109	0.907
FN1	PROC	4441661	4433614	9606.ENSP00000346839	9606.ENSP00000234071	0	0	0	0	0	0	0.9	0.106	0.906
CHGB	LAMC1	4445138	4434618	9606.ENSP00000368244	9606.ENSP00000258341	0	0	0	0	0	0	0.9	0.102	0.906
ADCY7	FPR3	4446306	4441189	9606.ENSP00000378187	9606.ENSP00000341821	0	0	0	0	0.086	0.06	0.9	0	0.906
ADH6	MAOA	4446342	4441072	9606.ENSP00000378359	9606.ENSP00000340684	0	0	0	0	0	0	0.9	0.106	0.906
NEDD4L	TRIM63	4446996	4444355	9606.ENSP00000383199	9606.ENSP00000363390	0	0	0	0	0.051	0.05	0.9	0.085	0.906
SIRPA	TREM2	4446972	4444111	9606.ENSP00000382941	9606.ENSP00000362205	0	0	0	0	0.159	0	0.8	0.488	0.906
VEGFA	CXCL12	4451310	4446453	9606.ENSP00000478570	9606.ENSP00000379140	0	0	0	0	0.061	0	0	0.904	0.906
LAMC1	APOB	4434618	4433584	9606.ENSP00000258341	9606.ENSP00000233242	0	0	0	0	0	0	0.9	0.099	0.906
TRIM63	TRIM9	4444355	4437487	9606.ENSP00000363390	9606.ENSP00000298355	0	0	0	0.657	0	0	0.9	0.21	0.906
VDR	GC	4450226	4449184	9606.ENSP00000447173	9606.ENSP00000421725	0	0	0	0	0.062	0.057	0	0.902	0.906
HLA-DQB2	GBP5	4447655	4443538	9606.ENSP00000390431	9606.ENSP00000359488	0	0	0	0	0.086	0	0.9	0.059	0.906
KLHL3	TRIM9	4438782	4437487	9606.ENSP00000312397	9606.ENSP00000298355	0	0	0	0	0.1	0	0.9	0	0.906
IRF6	ICAM1	4442789	4435501	9606.ENSP00000355988	9606.ENSP00000264832	0	0	0	0	0	0	0.9	0.107	0.906
LYPD6B	NTNG1	4447466	4443452	9606.ENSP00000387077	9606.ENSP00000359085	0	0	0	0	0	0	0.9	0.104	0.906
FN1	SCG2	4441661	4438023	9606.ENSP00000346839	9606.ENSP00000304133	0	0	0	0	0	0	0.9	0.104	0.906
CCL5	CASR	4451102	4449096	9606.ENSP00000474412	9606.ENSP00000420194	0	0	0	0	0	0	0.9	0.1	0.906
FCER1G	FCGR2A	4436828	4435978	9606.ENSP00000289902	9606.ENSP00000271450	0	0	0	0	0.619	0	0	0.765	0.906
HRG	SPARC	4433552	4433520	9606.ENSP00000232003	9606.ENSP00000231061	0	0	0	0	0	0	0.9	0.108	0.906
GDPD3	ENPP6	4447108	4437330	9606.ENSP00000384363	9606.ENSP00000296741	0	0	0	0	0.064	0	0.9	0.082	0.906
ADCY7	EDN1	4446306	4445200	9606.ENSP00000378187	9606.ENSP00000368683	0	0	0	0	0	0	0.9	0.104	0.906
TRIM22	HLA-DQB1	4445296	4444478	9606.ENSP00000369299	9606.ENSP00000364080	0	0	0	0	0.089	0	0.9	0.053	0.906
SLC12A1	KCNJ1	4446564	4446057	9606.ENSP00000379822	9606.ENSP00000376432	0	0	0	0	0.149	0	0	0.895	0.906
HLA-DPB1	TRIM22	4448476	4445296	9606.ENSP00000408146	9606.ENSP00000369299	0	0	0	0	0.098	0	0.9	0.046	0.906
CDH4	CDH3	4451902	4435356	9606.ENSP00000484928	9606.ENSP00000264012	0	0	0	0.899	0	0	0.9	0.65	0.906
STC2	LGALS1	4435556	4432889	9606.ENSP00000265087	9606.ENSP00000215909	0	0	0	0	0.061	0	0.9	0.081	0.906
TFAP2B	KIT	4446171	4436763	9606.ENSP00000377265	9606.ENSP00000288135	0	0	0	0	0	0	0.9	0.1	0.906
CTSS	ALDOC	4443237	4433361	9606.ENSP00000357981	9606.ENSP00000226253	0	0	0	0	0.052	0	0.9	0.09	0.906
AK3	ENTPD1	4445602	4443695	9606.ENSP00000371230	9606.ENSP00000360250	0	0	0	0	0	0	0.9	0.101	0.906
FPR3	KNG1	4441189	4435537	9606.ENSP00000341821	9606.ENSP00000265023	0	0	0	0	0	0	0.9	0.106	0.906
NEDD4L	ASB9	4446996	4445400	9606.ENSP00000383199	9606.ENSP00000369855	0	0	0	0	0.051	0.084	0.9	0.05	0.906
ENPP3	PYGL	4448408	4432954	9606.ENSP00000406261	9606.ENSP00000216392	0	0	0	0	0.062	0	0.9	0.081	0.906
RAB37	ITGAL	4446048	4441903	9606.ENSP00000376390	9606.ENSP00000349252	0	0	0	0	0.101	0	0.9	0	0.906
VAV1	HLA-DRA	4451047	4446403	9606.ENSP00000472929	9606.ENSP00000378786	0	0	0	0	0.098	0	0.9	0.047	0.906
SUCNR1	KNG1	4442617	4435537	9606.ENSP00000355156	9606.ENSP00000265023	0	0	0	0	0.063	0	0.9	0.085	0.906
APLN	SUCNR1	4447715	4442617	9606.ENSP00000391800	9606.ENSP00000355156	0	0	0	0	0	0	0.9	0.104	0.906
HLA-DPA1	TRIM22	4447805	4445296	9606.ENSP00000393566	9606.ENSP00000369299	0	0	0	0	0.088	0	0.9	0.056	0.906
CXCR4	ADCY7	4447439	4446306	9606.ENSP00000386884	9606.ENSP00000378187	0	0	0	0	0.063	0.06	0.9	0.059	0.906
LPAR5	GPR4	4439960	4439307	9606.ENSP00000327875	9606.ENSP00000319744	0	0	0	0.709	0	0	0.9	0.267	0.906
GCAT	AGXT	4445585	4437874	9606.ENSP00000371110	9606.ENSP00000302620	0	0	0	0	0.061	0	0.9	0.087	0.906
GBP5	HLA-DQA1	4443538	4440953	9606.ENSP00000359488	9606.ENSP00000339398	0	0	0	0	0.098	0	0.9	0.05	0.906
ASPM	KIAA0101	4442873	4437621	9606.ENSP00000356379	9606.ENSP00000300035	0	0	0	0	0.903	0	0	0.068	0.906
TRIM22	HLA-E	4445296	4444757	9606.ENSP00000369299	9606.ENSP00000365817	0	0	0	0	0.088	0	0.9	0.058	0.906
RDH12	AOX1	4450275	4444440	9606.ENSP00000449079	9606.ENSP00000363832	0	0	0	0	0	0	0.9	0.106	0.906
FXYD4	ATP1A1	4451809	4450152	9606.ENSP00000483791	9606.ENSP00000445306	0	0	0	0	0	0	0.9	0.103	0.906
CSPG4	CHSY3	4438793	4437877	9606.ENSP00000312506	9606.ENSP00000302629	0	0	0	0	0.103	0	0.9	0.045	0.906
HRG	TIMP1	4433552	4433052	9606.ENSP00000232003	9606.ENSP00000218388	0	0	0	0	0	0	0.9	0.091	0.905
COL23A1	PLOD2	4445902	4436514	9606.ENSP00000375069	9606.ENSP00000282903	0	0	0	0	0	0.093	0.9	0.043	0.905
FOLR3	DOCK2	4451565	4434518	9606.ENSP00000481114	9606.ENSP00000256935	0	0	0	0	0.096	0	0.9	0	0.905
GBP4	FCGR1B	4443540	4443305	9606.ENSP00000359490	9606.ENSP00000358391	0	0	0	0	0.089	0	0.9	0.043	0.905
ISG20	HLA-F	4438236	4434738	9606.ENSP00000306565	9606.ENSP00000259951	0	0	0	0	0.088	0	0.9	0.049	0.905
CHRDL1	FN1	4443870	4441661	9606.ENSP00000361112	9606.ENSP00000346839	0	0	0	0	0	0	0.9	0.094	0.905
NMB	GPR4	4446291	4439307	9606.ENSP00000378089	9606.ENSP00000319744	0	0	0	0	0	0	0.9	0.09	0.905
PLAU	ITGAL	4444017	4441903	9606.ENSP00000361850	9606.ENSP00000349252	0	0	0	0	0	0	0.9	0.089	0.905
LAMC1	FSTL3	4434618	4432697	9606.ENSP00000258341	9606.ENSP00000166139	0	0	0	0	0.098	0	0.9	0	0.905
ENPP1	COL4A2	4442442	4442382	9606.ENSP00000354238	9606.ENSP00000353654	0	0	0	0	0	0	0.9	0.096	0.905
SPTBN2	SCN4B	4449634	4439529	9606.ENSP00000432568	9606.ENSP00000322460	0	0	0	0	0.098	0	0.9	0	0.905
ITGB2	PLAT	4446737	4433132	9606.ENSP00000380948	9606.ENSP00000220809	0	0	0	0	0	0	0.9	0.093	0.905
COL23A1	PLOD3	4445902	4433268	9606.ENSP00000375069	9606.ENSP00000223127	0	0	0	0	0	0.093	0.9	0.043	0.905
VCAN	C3	4435552	4433951	9606.ENSP00000265077	9606.ENSP00000245907	0	0	0	0	0	0	0.9	0.093	0.905
HLA-B	FCGR1B	4448060	4443305	9606.ENSP00000399168	9606.ENSP00000358391	0	0	0	0	0.084	0	0.9	0.048	0.905
SCN4B	SCNN1G	4439529	4437627	9606.ENSP00000322460	9606.ENSP00000300061	0	0	0	0	0	0	0.9	0.089	0.905
SERPINA1	SPARC	4448813	4433520	9606.ENSP00000416066	9606.ENSP00000231061	0	0	0	0	0	0	0.9	0.091	0.905
HLA-DQB2	IRF6	4447655	4442789	9606.ENSP00000390431	9606.ENSP00000355988	0	0	0	0	0.06	0	0.9	0.076	0.905
GPC3	GPC5	4446259	4444820	9606.ENSP00000377836	9606.ENSP00000366267	0	0	0	0.901	0	0	0.9	0.62	0.905
TRIM22	HLA-F	4445296	4434738	9606.ENSP00000369299	9606.ENSP00000259951	0	0	0	0	0.09	0	0.9	0	0.905
HLA-DPB1	GBP1	4448476	4443543	9606.ENSP00000408146	9606.ENSP00000359504	0	0	0	0	0.097	0	0.9	0	0.905
RAB37	CD53	4446048	4435973	9606.ENSP00000376390	9606.ENSP00000271324	0	0	0	0	0.098	0	0.9	0	0.905
CASR	NMB	4449096	4446291	9606.ENSP00000420194	9606.ENSP00000378089	0	0	0	0	0	0	0.9	0.092	0.905
CASR	ADCY7	4449096	4446306	9606.ENSP00000420194	9606.ENSP00000378187	0	0	0	0	0	0	0.9	0.096	0.905
GPC3	PROC	4446259	4433614	9606.ENSP00000377836	9606.ENSP00000234071	0	0	0	0	0.078	0	0.9	0.055	0.905
EGF	PAG1	4435570	4433123	9606.ENSP00000265171	9606.ENSP00000220597	0	0	0	0	0	0	0.9	0.096	0.905
HLA-E	GBP5	4444757	4443538	9606.ENSP00000365817	9606.ENSP00000359488	0	0	0	0	0.098	0	0.9	0	0.905
ACAT1	ACLY	4435651	4434323	9606.ENSP00000265838	9606.ENSP00000253792	0.046	0	0	0	0.078	0	0.8	0.525	0.905
ASB9	TRIM9	4445400	4437487	9606.ENSP00000369855	9606.ENSP00000298355	0	0	0	0	0.062	0	0.9	0.074	0.905
HSPA2	HIST1H2BK	4446310	4441923	9606.ENSP00000378199	9606.ENSP00000349430	0	0	0	0	0.061	0.05	0.9	0.069	0.905
SERPINA1	CHGB	4448813	4445138	9606.ENSP00000416066	9606.ENSP00000368244	0	0	0	0	0	0	0.9	0.095	0.905
PROC	TIMP1	4433614	4433052	9606.ENSP00000234071	9606.ENSP00000218388	0	0	0	0	0	0	0.9	0.089	0.905
RAB37	CYBB	4446048	4445083	9606.ENSP00000376390	9606.ENSP00000367851	0	0	0	0	0.095	0	0.9	0	0.905
STC2	TIMP1	4435556	4433052	9606.ENSP00000265087	9606.ENSP00000218388	0	0	0	0	0.063	0	0.9	0.074	0.905
CASR	SUCNR1	4449096	4442617	9606.ENSP00000420194	9606.ENSP00000355156	0	0	0	0	0	0	0.9	0.09	0.905
SLC27A2	SLC15A4	4435783	4435731	9606.ENSP00000267842	9606.ENSP00000266771	0	0	0	0	0	0	0.9	0.098	0.905
FABP5	C3	4437379	4433951	9606.ENSP00000297258	9606.ENSP00000245907	0	0	0	0	0.049	0	0.9	0.09	0.905
CASR	PTGER1	4449096	4436972	9606.ENSP00000420194	9606.ENSP00000292513	0	0	0	0	0	0.057	0.9	0.078	0.905
CASR	KISS1R	4449096	4433626	9606.ENSP00000420194	9606.ENSP00000234371	0	0	0	0	0.061	0.057	0.9	0.057	0.905
GBP4	HLA-F	4443540	4434738	9606.ENSP00000359490	9606.ENSP00000259951	0	0	0	0	0.091	0	0.9	0.042	0.905
ALB	STC2	4437206	4435556	9606.ENSP00000295897	9606.ENSP00000265087	0	0	0	0	0.065	0	0.9	0.067	0.905
COL4A3	PLOD3	4446565	4433268	9606.ENSP00000379823	9606.ENSP00000223127	0	0	0	0	0	0.093	0.9	0.043	0.905
ADORA3	C5	4443373	4433289	9606.ENSP00000358730	9606.ENSP00000223642	0	0	0	0	0	0	0.9	0.093	0.905
ENPP1	GMPR	4442442	4434720	9606.ENSP00000354238	9606.ENSP00000259727	0	0	0	0	0	0	0.9	0.095	0.905
CD52	XPNPEP2	4444343	4443668	9606.ENSP00000363330	9606.ENSP00000360147	0	0	0	0	0.098	0	0.9	0	0.905
PLOD2	PLOD3	4436514	4433268	9606.ENSP00000282903	9606.ENSP00000223127	0	0	0	0.965	0.061	0	0.9	0.913	0.905
ITGA4	CSPG4	4446627	4438793	9606.ENSP00000380227	9606.ENSP00000312506	0	0	0	0	0.082	0	0.9	0.05	0.905
CCND2	CCND1	4434845	4433391	9606.ENSP00000261254	9606.ENSP00000227507	0	0	0	0.961	0.061	0	0.9	0.827	0.905
HLA-E	FCGR1B	4444757	4443305	9606.ENSP00000365817	9606.ENSP00000358391	0	0	0	0	0.096	0	0.9	0	0.905
HLA-E	ISG20	4444757	4438236	9606.ENSP00000365817	9606.ENSP00000306565	0	0	0	0	0.087	0	0.9	0	0.904
KLHL13	TRIM63	4450072	4444355	9606.ENSP00000443191	9606.ENSP00000363390	0	0	0	0	0.061	0	0.9	0.067	0.904
QRFPR	GPR4	4446272	4439307	9606.ENSP00000377948	9606.ENSP00000319744	0	0	0	0.623	0	0	0.9	0.146	0.904
SPARC	DCN	4433520	4432629	9606.ENSP00000231061	9606.ENSP00000052754	0	0	0	0	0.715	0	0	0.677	0.904
CASR	QRFPR	4449096	4446272	9606.ENSP00000420194	9606.ENSP00000377948	0	0	0	0	0	0	0.9	0.08	0.904
FCGR1B	HLA-F	4443305	4434738	9606.ENSP00000358391	9606.ENSP00000259951	0	0	0	0	0.084	0	0.9	0	0.904
CXCL12	LPAR5	4446453	4439960	9606.ENSP00000379140	9606.ENSP00000327875	0	0	0	0	0	0	0.9	0.081	0.904
VIM	MYL3	4450181	4446468	9606.ENSP00000446007	9606.ENSP00000379210	0	0	0	0	0.054	0	0.9	0.072	0.904
GPR4	KNG1	4439307	4435537	9606.ENSP00000319744	9606.ENSP00000265023	0	0	0	0	0	0	0.9	0.083	0.904
FCGR1B	HLA-DQA1	4443305	4440953	9606.ENSP00000358391	9606.ENSP00000339398	0	0	0	0	0.087	0	0.9	0.041	0.904
CCL5	LPAR5	4451102	4439960	9606.ENSP00000474412	9606.ENSP00000327875	0	0	0	0	0	0	0.9	0.086	0.904
PLAU	CD300A	4444017	4442338	9606.ENSP00000361850	9606.ENSP00000353259	0	0	0	0	0.061	0	0.9	0.062	0.904
CD36	CD53	4448068	4435973	9606.ENSP00000399421	9606.ENSP00000271324	0	0	0	0	0.088	0	0.9	0	0.904
KLHL13	ASB9	4450072	4445400	9606.ENSP00000443191	9606.ENSP00000369855	0	0	0	0	0.088	0	0.9	0	0.904
CXCR4	LPAR5	4447439	4439960	9606.ENSP00000386884	9606.ENSP00000327875	0	0	0	0.663	0.065	0	0.9	0.09	0.904
VIM	TNNC1	4450181	4433570	9606.ENSP00000446007	9606.ENSP00000232975	0	0	0	0	0.062	0	0.9	0.067	0.904
HLA-B	TRIM22	4448060	4445296	9606.ENSP00000399168	9606.ENSP00000369299	0	0	0	0	0.076	0	0.9	0.049	0.904
CCL20	KNG1	4442174	4435537	9606.ENSP00000351671	9606.ENSP00000265023	0	0	0	0	0	0	0.9	0.081	0.904
TNFSF13B	PSMB10	4444645	4442129	9606.ENSP00000365048	9606.ENSP00000351314	0	0	0	0	0.049	0	0.9	0.079	0.904
ITGB2	PROC	4446737	4433614	9606.ENSP00000380948	9606.ENSP00000234071	0	0	0	0	0.081	0	0.9	0	0.904
CASR	C5	4449096	4433289	9606.ENSP00000420194	9606.ENSP00000223642	0	0	0	0	0	0	0.9	0.08	0.904
CCL20	FPR3	4442174	4441189	9606.ENSP00000351671	9606.ENSP00000341821	0	0	0	0	0.065	0	0.9	0.058	0.904
FBXL16	KLHL3	4446705	4438782	9606.ENSP00000380746	9606.ENSP00000312397	0	0	0	0	0.084	0	0.9	0	0.904
VAV1	ITGAL	4451047	4441903	9606.ENSP00000472929	9606.ENSP00000349252	0	0	0	0	0.293	0	0.8	0.378	0.904
CYBB	SLC2A3	4445083	4432652	9606.ENSP00000367851	9606.ENSP00000075120	0	0	0	0	0	0	0.9	0.08	0.904
CYBB	SLC15A4	4445083	4435731	9606.ENSP00000367851	9606.ENSP00000266771	0	0	0	0	0.062	0	0.9	0.067	0.904
HLA-DPB1	FCGR1B	4448476	4443305	9606.ENSP00000408146	9606.ENSP00000358391	0	0	0	0	0.088	0	0.9	0	0.904
ENTPD1	TYMS	4443695	4439011	9606.ENSP00000360250	9606.ENSP00000315644	0	0	0	0	0.063	0	0.9	0.067	0.904
QRFPR	LPAR5	4446272	4439960	9606.ENSP00000377948	9606.ENSP00000327875	0	0	0	0.594	0	0	0.9	0.143	0.904
ADCY7	LPAR5	4446306	4439960	9606.ENSP00000378187	9606.ENSP00000327875	0	0	0	0	0.08	0	0.9	0	0.904
HLA-G	GBP1	4448666	4443543	9606.ENSP00000412927	9606.ENSP00000359504	0	0	0	0	0	0	0.9	0.08	0.904
HLA-DPA1	TRIM2	4447805	4440975	9606.ENSP00000393566	9606.ENSP00000339659	0	0	0	0	0	0	0.9	0.086	0.904
TRIM22	FCGR1B	4445296	4443305	9606.ENSP00000369299	9606.ENSP00000358391	0	0	0	0	0.069	0	0.9	0.056	0.904
IGFBP3	CHRDL1	4445494	4443870	9606.ENSP00000370473	9606.ENSP00000361112	0	0	0	0	0.062	0	0.9	0.067	0.904
HLA-B	GBP5	4448060	4443538	9606.ENSP00000399168	9606.ENSP00000359488	0	0	0	0	0.088	0	0.9	0	0.904
C3	LGALS1	4433951	4432889	9606.ENSP00000245907	9606.ENSP00000215909	0	0	0	0	0.049	0	0.9	0.08	0.904
FPR3	LPAR5	4441189	4439960	9606.ENSP00000341821	9606.ENSP00000327875	0	0	0	0.61	0.073	0	0.9	0.073	0.904
KLHL13	TRIM9	4450072	4437487	9606.ENSP00000443191	9606.ENSP00000298355	0	0	0	0	0.077	0	0.9	0	0.903
CD300A	SLC2A3	4442338	4432652	9606.ENSP00000353259	9606.ENSP00000075120	0	0	0	0	0.07	0	0.9	0	0.903
TNFRSF1B	PSMB10	4444700	4442129	9606.ENSP00000365435	9606.ENSP00000351314	0	0	0	0	0.073	0	0.9	0.043	0.903
ALDH1B1	ACOT12	4444922	4437948	9606.ENSP00000366927	9606.ENSP00000303246	0	0	0	0	0.063	0	0.9	0.056	0.903
SIRPA	SLC2A3	4446972	4432652	9606.ENSP00000382941	9606.ENSP00000075120	0	0	0	0	0	0	0.9	0.071	0.903
ENPP3	QPRT	4448408	4446401	9606.ENSP00000406261	9606.ENSP00000378782	0	0	0	0	0.061	0	0.9	0.056	0.903
TRIM22	ICAM1	4445296	4435501	9606.ENSP00000369299	9606.ENSP00000264832	0	0	0	0	0.067	0	0.9	0.046	0.903
GGH	ALDOC	4434748	4433361	9606.ENSP00000260118	9606.ENSP00000226253	0	0	0	0	0	0	0.9	0.072	0.903
ITGB2	TYROBP	4446737	4435115	9606.ENSP00000380948	9606.ENSP00000262629	0	0	0	0	0.852	0	0	0.377	0.903
GBP1	CXCL10	4443543	4438146	9606.ENSP00000359504	9606.ENSP00000305651	0	0	0	0	0.796	0	0	0.544	0.903
PLA2G7	APOB	4436162	4433584	9606.ENSP00000274793	9606.ENSP00000233242	0	0	0	0	0	0	0.72	0.669	0.903
CHRDL1	STC2	4443870	4435556	9606.ENSP00000361112	9606.ENSP00000265087	0	0	0	0	0.064	0	0.9	0.056	0.903
HLA-DQB1	IRF6	4444478	4442789	9606.ENSP00000364080	9606.ENSP00000355988	0	0	0	0	0.06	0	0.9	0.054	0.903
SERPINA1	FOLR1	4448813	4446175	9606.ENSP00000416066	9606.ENSP00000377284	0	0	0	0	0.066	0.051	0.9	0	0.903
EDN1	LPAR5	4445200	4439960	9606.ENSP00000368683	9606.ENSP00000327875	0	0	0	0	0.05	0	0.9	0.064	0.903
CCL5	BDKRB2	4451102	4450312	9606.ENSP00000474412	9606.ENSP00000450482	0	0	0	0	0	0	0.9	0.073	0.903
CCL5	ADCY7	4451102	4446306	9606.ENSP00000474412	9606.ENSP00000378187	0	0	0	0	0.069	0	0.9	0.05	0.903
APOM	APOB	4444651	4433584	9606.ENSP00000365081	9606.ENSP00000233242	0	0	0	0	0.135	0	0.72	0.634	0.903
NMB	KISS1R	4446291	4433626	9606.ENSP00000378089	9606.ENSP00000234371	0	0	0	0	0	0	0.9	0.073	0.903
HLA-DQB1	TRIM2	4444478	4440975	9606.ENSP00000364080	9606.ENSP00000339659	0	0	0	0	0	0	0.9	0.075	0.903
HLA-DQB2	TRIM2	4447655	4440975	9606.ENSP00000390431	9606.ENSP00000339659	0	0	0	0	0	0	0.9	0.075	0.903
VCAN	FSTL3	4435552	4432697	9606.ENSP00000265077	9606.ENSP00000166139	0	0	0	0	0	0	0.9	0.073	0.903
GBP4	ICAM1	4443540	4435501	9606.ENSP00000359490	9606.ENSP00000264832	0	0	0	0	0.061	0	0.9	0.058	0.903
ENPP1	PYGL	4442442	4432954	9606.ENSP00000354238	9606.ENSP00000216392	0	0	0	0	0.061	0	0.9	0.055	0.903
NMB	QRFPR	4446291	4446272	9606.ENSP00000378089	9606.ENSP00000377948	0	0	0	0	0	0	0.9	0.07	0.903
ASB9	KLHL3	4445400	4438782	9606.ENSP00000369855	9606.ENSP00000312397	0	0	0	0	0	0	0.9	0.073	0.903
ACLY	C3	4434323	4433951	9606.ENSP00000253792	9606.ENSP00000245907	0	0	0	0	0	0	0.9	0.071	0.903
SCG2	LAMC1	4438023	4434618	9606.ENSP00000304133	9606.ENSP00000258341	0	0	0	0	0	0	0.9	0.073	0.903
FABP5	LYZ	4437379	4434847	9606.ENSP00000297258	9606.ENSP00000261267	0	0	0	0	0.061	0	0.9	0.051	0.903
KNG1	LGALS1	4435537	4432889	9606.ENSP00000265023	9606.ENSP00000215909	0	0	0	0	0.063	0	0.9	0.056	0.903
CD36	PLAU	4448068	4444017	9606.ENSP00000399421	9606.ENSP00000361850	0	0	0	0	0.062	0	0.9	0.05	0.903
GPC3	CP	4446259	4435459	9606.ENSP00000377836	9606.ENSP00000264613	0	0	0	0	0.064	0	0.9	0.053	0.903
SERPINA1	STC2	4448813	4435556	9606.ENSP00000416066	9606.ENSP00000265087	0	0	0	0	0.051	0	0.9	0.062	0.903
CDH5	CDH6	4441389	4435549	9606.ENSP00000344115	9606.ENSP00000265071	0	0	0	0.88	0	0	0.9	0.35	0.903
ADORA3	C3	4443373	4433951	9606.ENSP00000358730	9606.ENSP00000245907	0	0	0	0	0	0	0.9	0.079	0.903
PDE10A	AK3	4449860	4445602	9606.ENSP00000438284	9606.ENSP00000371230	0	0	0	0	0.062	0	0.9	0.058	0.903
HLA-E	GBP4	4444757	4443540	9606.ENSP00000365817	9606.ENSP00000359490	0	0	0	0	0.074	0	0.9	0.042	0.903
GGH	PYCARD	4434748	4434024	9606.ENSP00000260118	9606.ENSP00000247470	0	0	0	0	0.076	0	0.9	0	0.903
SERPINA1	LAMC1	4448813	4434618	9606.ENSP00000416066	9606.ENSP00000258341	0	0	0	0	0	0	0.9	0.073	0.903
CD36	SLC15A4	4448068	4435731	9606.ENSP00000399421	9606.ENSP00000266771	0	0	0	0	0.063	0	0.9	0.049	0.903
PECAM1	VWF	4450567	4434871	9606.ENSP00000457421	9606.ENSP00000261405	0	0	0	0	0.175	0	0	0.887	0.903
CXCR4	SUCNR1	4447439	4442617	9606.ENSP00000386884	9606.ENSP00000355156	0	0	0	0.663	0.065	0	0.9	0.073	0.903
CASR	CXCL10	4449096	4438146	9606.ENSP00000420194	9606.ENSP00000305651	0	0	0	0	0	0	0.9	0.077	0.903
STC2	C3	4435556	4433951	9606.ENSP00000265087	9606.ENSP00000245907	0	0	0	0	0	0	0.9	0.07	0.903
CASR	FPR3	4449096	4441189	9606.ENSP00000420194	9606.ENSP00000341821	0	0	0	0	0	0.057	0.9	0.058	0.903
ADORA3	CCL20	4443373	4442174	9606.ENSP00000358730	9606.ENSP00000351671	0	0	0	0	0	0	0.9	0.061	0.902
FCGR1B	ICAM1	4443305	4435501	9606.ENSP00000358391	9606.ENSP00000264832	0	0	0	0	0.055	0	0.9	0.052	0.902
LAMC1	PROC	4434618	4433614	9606.ENSP00000258341	9606.ENSP00000234071	0	0	0	0	0	0	0.9	0.064	0.902
RUNX3	PSMB10	4446960	4442129	9606.ENSP00000382800	9606.ENSP00000351314	0	0	0	0	0.069	0	0.9	0	0.902
SPTBN2	HLA-DQB2	4449634	4447655	9606.ENSP00000432568	9606.ENSP00000390431	0	0	0	0	0	0	0.9	0.063	0.902
SCG2	VCAN	4438023	4435552	9606.ENSP00000304133	9606.ENSP00000265077	0	0	0	0	0.054	0	0.9	0.056	0.902
GCGR	KISS1R	4447027	4433626	9606.ENSP00000383558	9606.ENSP00000234371	0	0	0	0	0	0	0.9	0.062	0.902
FABP5	GGH	4437379	4434748	9606.ENSP00000297258	9606.ENSP00000260118	0	0	0	0	0.065	0	0.9	0.041	0.902
HLA-DQB2	TRIM22	4447655	4445296	9606.ENSP00000390431	9606.ENSP00000369299	0	0	0	0	0.069	0	0.9	0	0.902
BDKRB2	CXCR4	4450312	4447439	9606.ENSP00000450482	9606.ENSP00000386884	0	0	0	0.732	0	0	0.9	0.138	0.902
PGAM2	ALDOC	4437386	4433361	9606.ENSP00000297283	9606.ENSP00000226253	0.073	0	0	0	0.171	0.436	0.6	0.522	0.902
VEGFA	PECAM1	4451310	4450567	9606.ENSP00000478570	9606.ENSP00000457421	0	0	0	0	0	0	0	0.902	0.902
CXCL12	ADCY7	4446453	4446306	9606.ENSP00000379140	9606.ENSP00000378187	0	0	0	0	0	0	0.9	0.064	0.902
CXCL12	SUCNR1	4446453	4442617	9606.ENSP00000379140	9606.ENSP00000355156	0	0	0	0	0.061	0	0.9	0.049	0.902
TPD52L1	SH3GL2	4449699	4445424	9606.ENSP00000434142	9606.ENSP00000369981	0	0	0	0	0.061	0	0.9	0	0.902
HLA-G	GBP5	4448666	4443538	9606.ENSP00000412927	9606.ENSP00000359488	0	0	0	0	0.063	0	0.9	0	0.902
C3	FSTL3	4433951	4432697	9606.ENSP00000245907	9606.ENSP00000166139	0	0	0	0	0.069	0	0.9	0	0.902
SCG2	STC2	4438023	4435556	9606.ENSP00000304133	9606.ENSP00000265087	0	0	0	0	0	0	0.9	0.065	0.902
ACAA1	GGH	4440473	4434748	9606.ENSP00000333664	9606.ENSP00000260118	0	0	0	0	0.062	0	0.9	0	0.902
IL4I1	BHMT	4451032	4436127	9606.ENSP00000472474	9606.ENSP00000274353	0	0	0	0	0	0	0.9	0.065	0.902
ITGB2	APOB	4446737	4433584	9606.ENSP00000380948	9606.ENSP00000233242	0	0	0	0	0	0	0.9	0.069	0.902
IFI27	HLA-E	4451772	4444757	9606.ENSP00000483430	9606.ENSP00000365817	0	0	0	0	0.069	0	0.9	0	0.902
CD163	CSF1R	4442211	4436666	9606.ENSP00000352071	9606.ENSP00000286301	0	0	0	0	0.779	0	0	0.575	0.902
GCGR	EDN1	4447027	4445200	9606.ENSP00000383558	9606.ENSP00000368683	0	0	0	0	0	0	0.9	0.068	0.902
BDKRB2	CCL20	4450312	4442174	9606.ENSP00000450482	9606.ENSP00000351671	0	0	0	0	0.061	0	0.9	0	0.902
HLA-E	TREM2	4444757	4444111	9606.ENSP00000365817	9606.ENSP00000362205	0	0	0	0	0.065	0	0.9	0	0.902
GGH	GSTM3	4434748	4434500	9606.ENSP00000260118	9606.ENSP00000256594	0	0	0	0	0.061	0	0.9	0.049	0.902
SPTBN2	FOLR1	4449634	4446175	9606.ENSP00000432568	9606.ENSP00000377284	0	0	0	0	0.066	0	0.9	0	0.902
SUCNR1	C3	4442617	4433951	9606.ENSP00000355156	9606.ENSP00000245907	0	0	0	0	0.064	0	0.9	0	0.902
IGFBP3	PROC	4445494	4433614	9606.ENSP00000370473	9606.ENSP00000234071	0	0	0	0	0.062	0	0.9	0	0.902
GGH	ACLY	4434748	4434323	9606.ENSP00000260118	9606.ENSP00000253792	0	0	0	0	0.069	0	0.9	0	0.902
COL4A1	F12	4444632	4434311	9606.ENSP00000364979	9606.ENSP00000253496	0	0	0	0	0	0.063	0.9	0.043	0.902
CHRDL1	ALB	4443870	4437206	9606.ENSP00000361112	9606.ENSP00000295897	0	0	0	0	0	0	0.9	0.066	0.902
TPD52L1	AP1M2	4449699	4434125	9606.ENSP00000434142	9606.ENSP00000250244	0	0	0	0	0.061	0	0.9	0	0.902
SH3GL2	AP1M2	4445424	4434125	9606.ENSP00000369981	9606.ENSP00000250244	0	0	0	0	0	0	0.9	0.063	0.902
SIRPA	CD53	4446972	4435973	9606.ENSP00000382941	9606.ENSP00000271324	0	0	0	0	0.065	0	0.9	0	0.902
GBP1	TRIM2	4443543	4440975	9606.ENSP00000359504	9606.ENSP00000339659	0	0	0	0	0	0	0.9	0.066	0.902
GP2	XPNPEP2	4445540	4443668	9606.ENSP00000370767	9606.ENSP00000360147	0	0	0	0	0.061	0	0.9	0	0.902
CCL5	SUCNR1	4451102	4442617	9606.ENSP00000474412	9606.ENSP00000355156	0	0	0	0	0.067	0	0.9	0	0.902
ITGB2	SLC27A2	4446737	4435783	9606.ENSP00000380948	9606.ENSP00000267842	0	0	0	0	0.051	0	0.9	0.058	0.902
RAB42	RAB25	4444267	4442453	9606.ENSP00000362932	9606.ENSP00000354376	0	0	0	0.759	0	0	0.9	0.137	0.902
HLA-DPB1	PAG1	4448476	4433123	9606.ENSP00000408146	9606.ENSP00000220597	0	0	0	0	0.062	0	0.9	0	0.902
PSMB10	BIRC3	4442129	4435265	9606.ENSP00000351314	9606.ENSP00000263464	0	0	0	0	0.062	0	0.9	0	0.902
COL4A6	F12	4446339	4434311	9606.ENSP00000378340	9606.ENSP00000253496	0	0	0	0	0	0.063	0.9	0.043	0.902
FBXL16	TRIM63	4446705	4444355	9606.ENSP00000380746	9606.ENSP00000363390	0	0	0	0	0.064	0	0.9	0	0.902
CCL5	APLN	4451102	4447715	9606.ENSP00000474412	9606.ENSP00000391800	0	0	0	0	0	0	0.9	0.067	0.902
ENPP3	PANK1	4448408	4437824	9606.ENSP00000406261	9606.ENSP00000302108	0	0	0	0	0.062	0	0.9	0	0.902
GPC3	C3	4446259	4433951	9606.ENSP00000377836	9606.ENSP00000245907	0	0	0	0	0	0	0.9	0.069	0.902
GIT2	LAMA4	4441723	4433505	9606.ENSP00000347464	9606.ENSP00000230538	0	0	0	0	0.064	0	0.9	0	0.902
APOB	LGALS1	4433584	4432889	9606.ENSP00000233242	9606.ENSP00000215909	0	0	0	0	0	0	0.9	0.061	0.902
APOB	SPARC	4433584	4433520	9606.ENSP00000233242	9606.ENSP00000231061	0	0	0	0	0	0	0.9	0.066	0.902
FBXL16	ASB9	4446705	4445400	9606.ENSP00000380746	9606.ENSP00000369855	0	0	0	0	0.064	0	0.9	0	0.902
SERPINA1	LGALS1	4448813	4432889	9606.ENSP00000416066	9606.ENSP00000215909	0	0	0	0	0	0	0.9	0.067	0.902
GIT2	LAMC1	4441723	4434618	9606.ENSP00000347464	9606.ENSP00000258341	0	0	0	0	0.064	0	0.9	0	0.902
ENTPD1	GMPR	4443695	4434720	9606.ENSP00000360250	9606.ENSP00000259727	0	0	0	0	0.061	0	0.9	0.049	0.902
COL4A3	F12	4446565	4434311	9606.ENSP00000379823	9606.ENSP00000253496	0	0	0	0	0	0.063	0.9	0.043	0.902
SUCNR1	C5	4442617	4433289	9606.ENSP00000355156	9606.ENSP00000223642	0	0	0	0	0.063	0	0.9	0	0.902
ADCY7	C5	4446306	4433289	9606.ENSP00000378187	9606.ENSP00000223642	0	0	0	0	0.062	0	0.9	0.044	0.902
BDKRB2	CXCL10	4450312	4438146	9606.ENSP00000450482	9606.ENSP00000305651	0	0	0	0	0.062	0	0.9	0.048	0.902
TFAP2B	CAV1	4446171	4440933	9606.ENSP00000377265	9606.ENSP00000339191	0	0	0	0	0.062	0	0.9	0	0.902
IFI27	IRF6	4451772	4442789	9606.ENSP00000483430	9606.ENSP00000355988	0	0	0	0	0	0	0.9	0.064	0.902
CHGB	VCAN	4445138	4435552	9606.ENSP00000368244	9606.ENSP00000265077	0	0	0	0	0	0	0.9	0.063	0.902
ENPP1	PANK1	4442442	4437824	9606.ENSP00000354238	9606.ENSP00000302108	0	0	0	0	0.062	0	0.9	0	0.902
LPAR5	KNG1	4439960	4435537	9606.ENSP00000327875	9606.ENSP00000265023	0	0	0	0	0	0	0.9	0.065	0.902
CXCL9	LPAR5	4442567	4439960	9606.ENSP00000354901	9606.ENSP00000327875	0	0	0	0	0.064	0	0.9	0	0.902
TNFAIP6	ALDOC	4433852	4433361	9606.ENSP00000243347	9606.ENSP00000226253	0	0	0	0	0	0	0.9	0.066	0.902
SPTBN2	HLA-DQB1	4449634	4444478	9606.ENSP00000432568	9606.ENSP00000364080	0	0	0	0	0	0	0.9	0.063	0.902
CD3D	EGF	4437689	4435570	9606.ENSP00000300692	9606.ENSP00000265171	0	0	0	0	0	0	0.9	0.066	0.902
GCGR	NMB	4447027	4446291	9606.ENSP00000383558	9606.ENSP00000378089	0	0	0	0	0	0	0.9	0.062	0.902
HADH	AOX1	4451107	4444440	9606.ENSP00000474560	9606.ENSP00000363832	0	0	0	0	0	0	0.9	0.063	0.902
HSPA2	HSPA6	4446310	4438569	9606.ENSP00000378199	9606.ENSP00000310219	0	0	0.449	0.98	0.047	0	0.9	0.443	0.902
COL4A2	F12	4442382	4434311	9606.ENSP00000353654	9606.ENSP00000253496	0	0	0	0	0	0.063	0.9	0.043	0.902
COL4A4	F12	4446575	4434311	9606.ENSP00000379866	9606.ENSP00000253496	0	0	0	0	0	0.063	0.9	0.043	0.902
NEDD4L	FBXL16	4446996	4446705	9606.ENSP00000383199	9606.ENSP00000380746	0	0	0	0	0.062	0	0.9	0.044	0.902
ITGAL	SLC15A4	4441903	4435731	9606.ENSP00000349252	9606.ENSP00000266771	0	0	0	0	0.062	0	0.9	0.042	0.902
CHGB	C3	4445138	4433951	9606.ENSP00000368244	9606.ENSP00000245907	0	0	0	0	0	0	0.9	0.066	0.902
CD53	SLC2A3	4435973	4432652	9606.ENSP00000271324	9606.ENSP00000075120	0	0	0	0	0.063	0	0.9	0	0.902
CCL20	C5	4442174	4433289	9606.ENSP00000351671	9606.ENSP00000223642	0	0	0	0	0	0	0.9	0.063	0.902
GPC3	KNG1	4446259	4435537	9606.ENSP00000377836	9606.ENSP00000265023	0	0	0	0	0	0	0.9	0.065	0.902
NEDD4L	TRIM9	4446996	4437487	9606.ENSP00000383199	9606.ENSP00000298355	0	0	0	0	0.061	0	0.9	0.048	0.902
ITGB2	SLC2A3	4446737	4432652	9606.ENSP00000380948	9606.ENSP00000075120	0	0	0	0	0.063	0	0.9	0	0.902
RAB37	TNFRSF1B	4446048	4444700	9606.ENSP00000376390	9606.ENSP00000365435	0	0	0	0	0.063	0	0.9	0	0.902
ADCY7	C3	4446306	4433951	9606.ENSP00000378187	9606.ENSP00000245907	0	0	0	0	0.062	0	0.9	0.044	0.902
KNG1	FSTL3	4435537	4432697	9606.ENSP00000265023	9606.ENSP00000166139	0	0	0	0	0	0	0.9	0.062	0.902
RNASET2	C3	4449364	4433951	9606.ENSP00000426455	9606.ENSP00000245907	0	0	0	0	0.056	0	0.9	0	0.901
KLHL13	NEDD4L	4450072	4446996	9606.ENSP00000443191	9606.ENSP00000383199	0	0	0	0	0.052	0	0.9	0	0.901
ENPP3	AK3	4448408	4445602	9606.ENSP00000406261	9606.ENSP00000371230	0	0	0	0	0.049	0	0.9	0.05	0.901
ADCY7	SUCNR1	4446306	4442617	9606.ENSP00000378187	9606.ENSP00000355156	0	0	0	0	0.06	0	0.9	0	0.901
PLAU	SLC15A4	4444017	4435731	9606.ENSP00000361850	9606.ENSP00000266771	0	0	0	0	0	0	0.9	0.058	0.901
ST3GAL6	LUM	4451535	4435725	9606.ENSP00000480884	9606.ENSP00000266718	0	0	0	0	0	0	0.9	0.059	0.901
AK3	ENPP1	4445602	4442442	9606.ENSP00000371230	9606.ENSP00000354238	0	0	0	0	0.049	0	0.9	0.05	0.901
HLA-DRA	TRIM2	4446403	4440975	9606.ENSP00000378786	9606.ENSP00000339659	0	0	0	0	0	0	0.9	0.055	0.901
HIST1H2BK	CCND1	4441923	4433391	9606.ENSP00000349430	9606.ENSP00000227507	0	0	0	0	0	0	0.9	0.053	0.901
BDKRB2	CASR	4450312	4449096	9606.ENSP00000450482	9606.ENSP00000420194	0	0	0	0	0	0	0.9	0.051	0.901
ENPP3	GMPR	4448408	4434720	9606.ENSP00000406261	9606.ENSP00000259727	0	0	0	0	0	0	0.9	0.052	0.901
HLA-DPB1	LAG3	4448476	4432798	9606.ENSP00000408146	9606.ENSP00000203629	0	0	0	0	0	0	0.9	0.054	0.901
SERPINA1	CHRDL1	4448813	4443870	9606.ENSP00000416066	9606.ENSP00000361112	0	0	0	0	0.055	0	0.9	0	0.901
GCGR	PTGER1	4447027	4436972	9606.ENSP00000383558	9606.ENSP00000292513	0	0	0	0	0	0	0.9	0.057	0.901
GPR4	KISS1R	4439307	4433626	9606.ENSP00000319744	9606.ENSP00000234371	0	0	0	0.601	0	0	0.9	0.087	0.901
IRF6	HLA-DQA1	4442789	4440953	9606.ENSP00000355988	9606.ENSP00000339398	0	0	0	0	0.049	0	0.9	0.049	0.901
FOLR1	TGFA	4446175	4437149	9606.ENSP00000377284	9606.ENSP00000295400	0	0	0	0	0	0	0.9	0.053	0.901
VCAN	CP	4435552	4435459	9606.ENSP00000265077	9606.ENSP00000264613	0	0	0	0	0	0	0.9	0.053	0.901
CHRDL1	CP	4443870	4435459	9606.ENSP00000361112	9606.ENSP00000264613	0	0	0	0	0.057	0	0.9	0	0.901
LPAR5	C3	4439960	4433951	9606.ENSP00000327875	9606.ENSP00000245907	0	0	0	0	0	0	0.9	0.055	0.901
CCL28	C3	4442460	4433951	9606.ENSP00000354416	9606.ENSP00000245907	0	0	0	0	0	0	0.9	0.057	0.901
TNFRSF1B	SLC15A4	4444700	4435731	9606.ENSP00000365435	9606.ENSP00000266771	0	0	0	0	0.055	0	0.9	0	0.901
HLA-B	TRIM2	4448060	4440975	9606.ENSP00000399168	9606.ENSP00000339659	0	0	0	0	0	0	0.9	0.057	0.901
PDE1A	AK3	4448547	4445602	9606.ENSP00000410309	9606.ENSP00000371230	0	0	0	0	0.051	0	0.9	0.049	0.901
FOLR1	ANK2	4446175	4441946	9606.ENSP00000377284	9606.ENSP00000349588	0	0	0	0	0	0.059	0.9	0	0.901
SCG2	FSTL3	4438023	4432697	9606.ENSP00000304133	9606.ENSP00000166139	0	0	0	0	0.043	0	0.9	0.054	0.901
ABAT	SORD	4446571	4435781	9606.ENSP00000379845	9606.ENSP00000267814	0.16	0	0	0	0.062	0.867	0	0.175	0.901
COL4A4	ENPP1	4446575	4442442	9606.ENSP00000379866	9606.ENSP00000354238	0	0	0	0	0	0	0.9	0.057	0.901
RAB37	SLC2A3	4446048	4432652	9606.ENSP00000376390	9606.ENSP00000075120	0	0	0	0	0.056	0	0.9	0	0.901
PLAU	CD53	4444017	4435973	9606.ENSP00000361850	9606.ENSP00000271324	0	0	0	0	0	0	0.9	0.053	0.901
PROC	FSTL3	4433614	4432697	9606.ENSP00000234071	9606.ENSP00000166139	0	0	0	0	0	0	0.9	0.053	0.901
COL4A1	ENPP1	4444632	4442442	9606.ENSP00000364979	9606.ENSP00000354238	0	0	0	0	0	0	0.9	0.057	0.901
APLN	CXCL10	4447715	4438146	9606.ENSP00000391800	9606.ENSP00000305651	0	0	0	0	0	0	0.9	0.047	0.9
EYA4	HIST1H2BK	4449645	4441923	9606.ENSP00000432770	9606.ENSP00000349430	0	0	0	0	0	0	0.9	0	0.9
C1QA	CSF1R	4444428	4436666	9606.ENSP00000363773	9606.ENSP00000286301	0	0	0	0	0.876	0	0	0.226	0.9
SPTBN2	HLA-DPA1	4449634	4447805	9606.ENSP00000432568	9606.ENSP00000393566	0	0	0	0	0	0	0.9	0	0.9
SPTBN2	HLA-DRA	4449634	4446403	9606.ENSP00000432568	9606.ENSP00000378786	0	0	0	0	0	0	0.9	0	0.9
COL4A3	ENPP1	4446565	4442442	9606.ENSP00000379823	9606.ENSP00000354238	0	0	0	0	0	0	0.9	0	0.9
HLA-DPA1	AP1M2	4447805	4434125	9606.ENSP00000393566	9606.ENSP00000250244	0	0	0	0	0	0	0.9	0	0.9
HLA-G	ISG20	4448666	4438236	9606.ENSP00000412927	9606.ENSP00000306565	0	0	0	0	0	0	0.9	0	0.9
RAB37	LPCAT1	4446048	4436543	9606.ENSP00000376390	9606.ENSP00000283415	0	0	0	0	0	0	0.9	0	0.9
APLN	CXCL9	4447715	4442567	9606.ENSP00000391800	9606.ENSP00000354901	0	0	0	0	0	0	0.9	0	0.9
HOXA4	HIST1H2BK	4442328	4441923	9606.ENSP00000353151	9606.ENSP00000349430	0	0	0	0	0	0	0.9	0	0.9
IRF6	HLA-F	4442789	4434738	9606.ENSP00000355988	9606.ENSP00000259951	0	0	0	0	0	0	0.9	0.043	0.9
SERPINA1	SCG2	4448813	4438023	9606.ENSP00000416066	9606.ENSP00000304133	0	0	0	0	0	0	0.9	0	0.9
AP1M2	CD74	4434125	4432583	9606.ENSP00000250244	9606.ENSP00000009530	0	0	0	0	0	0	0.9	0	0.9
RAB37	PLAU	4446048	4444017	9606.ENSP00000376390	9606.ENSP00000361850	0	0	0	0	0	0	0.9	0	0.9
CHRDL1	PROC	4443870	4433614	9606.ENSP00000361112	9606.ENSP00000234071	0	0	0	0	0	0	0.9	0	0.9
SH3GL2	RPS6KA6	4445424	4435134	9606.ENSP00000369981	9606.ENSP00000262752	0	0	0	0	0	0	0.9	0	0.9
IRF6	TRIM2	4442789	4440975	9606.ENSP00000355988	9606.ENSP00000339659	0	0	0	0	0	0	0.9	0	0.9
IGFBP3	CHGB	4445494	4445138	9606.ENSP00000370473	9606.ENSP00000368244	0	0	0	0	0	0	0.9	0	0.9
ITGAL	SLC27A2	4441903	4435783	9606.ENSP00000349252	9606.ENSP00000267842	0	0	0	0	0	0	0.9	0	0.9
HLA-DQB2	SH3GL2	4447655	4445424	9606.ENSP00000390431	9606.ENSP00000369981	0	0	0	0	0	0	0.9	0	0.9
CASR	APLN	4449096	4447715	9606.ENSP00000420194	9606.ENSP00000391800	0	0	0	0	0	0	0.9	0.043	0.9
PSMB10	EGLN3	4442129	4434133	9606.ENSP00000351314	9606.ENSP00000250457	0	0	0	0	0	0	0.9	0	0.9
RAB37	SLC15A4	4446048	4435731	9606.ENSP00000376390	9606.ENSP00000266771	0	0	0	0	0	0	0.9	0	0.9
LYPD6B	CD52	4447466	4444343	9606.ENSP00000387077	9606.ENSP00000363330	0	0	0	0	0	0	0.9	0	0.9
CHGB	CHRDL1	4445138	4443870	9606.ENSP00000368244	9606.ENSP00000361112	0	0	0	0	0	0	0.9	0	0.9
HLA-DPB1	TRIM2	4448476	4440975	9606.ENSP00000408146	9606.ENSP00000339659	0	0	0	0	0	0	0.9	0	0.9
HLA-DRA	AP1M2	4446403	4434125	9606.ENSP00000378786	9606.ENSP00000250244	0	0	0	0	0	0	0.9	0	0.9
APLN	LPAR5	4447715	4439960	9606.ENSP00000391800	9606.ENSP00000327875	0	0	0	0	0	0	0.9	0	0.9
HLA-DQA1	PAG1	4440953	4433123	9606.ENSP00000339398	9606.ENSP00000220597	0	0	0	0	0	0	0.9	0	0.9
GBP4	IRF6	4443540	4442789	9606.ENSP00000359490	9606.ENSP00000355988	0	0	0	0	0	0	0.9	0.048	0.9
SH3GL2	HLA-DQB1	4445424	4444478	9606.ENSP00000369981	9606.ENSP00000364080	0	0	0	0	0	0	0.9	0	0.9
VCAN	PROC	4435552	4433614	9606.ENSP00000265077	9606.ENSP00000234071	0	0	0	0	0	0	0.9	0	0.9
HLA-DQA1	AP1M2	4440953	4434125	9606.ENSP00000339398	9606.ENSP00000250244	0	0	0	0	0	0	0.9	0	0.9
QRFPR	EDN1	4446272	4445200	9606.ENSP00000377948	9606.ENSP00000368683	0	0	0	0	0	0	0.9	0.046	0.9
APLN	ADORA3	4447715	4443373	9606.ENSP00000391800	9606.ENSP00000358730	0	0	0	0	0	0	0.9	0	0.9
CHRDL1	LGALS1	4443870	4432889	9606.ENSP00000361112	9606.ENSP00000215909	0	0	0	0	0	0	0.9	0	0.9
CD8A	PAG1	4447395	4433123	9606.ENSP00000386559	9606.ENSP00000220597	0	0	0	0	0	0	0.9	0	0.9
BDKRB2	KISS1R	4450312	4433626	9606.ENSP00000450482	9606.ENSP00000234371	0	0	0	0.645	0	0	0.9	0	0.9
HIST1H2BK	DNMT3L	4441923	4435929	9606.ENSP00000349430	9606.ENSP00000270172	0	0	0	0	0	0	0.9	0	0.9
APLN	ADCY7	4447715	4446306	9606.ENSP00000391800	9606.ENSP00000378187	0	0	0	0	0	0	0.9	0	0.9
HLA-B	GBP4	4448060	4443540	9606.ENSP00000399168	9606.ENSP00000359490	0	0	0	0	0	0	0.9	0.042	0.9
CHGB	APOB	4445138	4433584	9606.ENSP00000368244	9606.ENSP00000233242	0	0	0	0	0	0	0.9	0.045	0.9
SUCNR1	CCL20	4442617	4442174	9606.ENSP00000355156	9606.ENSP00000351671	0	0	0	0	0	0	0.9	0	0.9
ADCY7	CCL20	4446306	4442174	9606.ENSP00000378187	9606.ENSP00000351671	0	0	0	0	0	0	0.9	0	0.9
HLA-G	TRIM2	4448666	4440975	9606.ENSP00000412927	9606.ENSP00000339659	0	0	0	0	0	0	0.9	0	0.9
CHRDL1	KNG1	4443870	4435537	9606.ENSP00000361112	9606.ENSP00000265023	0	0	0	0	0	0	0.9	0	0.9
ADCY7	CCL28	4446306	4442460	9606.ENSP00000378187	9606.ENSP00000354416	0	0	0	0	0	0	0.9	0.041	0.9
ADM	ADCY7	4449788	4446306	9606.ENSP00000436607	9606.ENSP00000378187	0	0	0	0	0	0	0.9	0	0.9
LYZ	ALDOC	4434847	4433361	9606.ENSP00000261267	9606.ENSP00000226253	0	0	0	0	0	0	0.9	0	0.9
CASR	CCL20	4449096	4442174	9606.ENSP00000420194	9606.ENSP00000351671	0	0	0	0	0	0	0.9	0	0.9
RAB37	ACPP	4446048	4439571	9606.ENSP00000376390	9606.ENSP00000323036	0	0	0	0	0	0	0.9	0	0.9
HLA-G	GBP4	4448666	4443540	9606.ENSP00000412927	9606.ENSP00000359490	0	0	0	0	0	0	0.9	0.042	0.9
BDKRB2	LPAR5	4450312	4439960	9606.ENSP00000450482	9606.ENSP00000327875	0	0	0	0.667	0	0	0.9	0	0.9
GSTO2	GGH	4441482	4434748	9606.ENSP00000345023	9606.ENSP00000260118	0	0	0	0	0	0	0.9	0	0.9
SERPINA1	FSTL3	4448813	4432697	9606.ENSP00000416066	9606.ENSP00000166139	0	0	0	0	0	0	0.9	0.042	0.9
ABCA1	SCARB1	4444444	4434927	9606.ENSP00000363868	9606.ENSP00000261693	0	0	0	0	0.061	0	0	0.898	0.9
CD53	SLC15A4	4435973	4435731	9606.ENSP00000271324	9606.ENSP00000266771	0	0	0	0	0	0	0.9	0	0.9
CP	FSTL3	4435459	4432697	9606.ENSP00000264613	9606.ENSP00000166139	0	0	0	0	0	0	0.9	0	0.9
FCGR1B	IRF6	4443305	4442789	9606.ENSP00000358391	9606.ENSP00000355988	0	0	0	0	0.049	0	0.9	0	0.9
SCG2	LGALS1	4438023	4432889	9606.ENSP00000304133	9606.ENSP00000215909	0	0	0	0	0	0	0.9	0	0.9
SPTBN2	HLA-DMA	4449634	4444460	9606.ENSP00000432568	9606.ENSP00000363976	0	0	0	0	0	0	0.9	0	0.9
ADCY7	CXCL9	4446306	4442567	9606.ENSP00000378187	9606.ENSP00000354901	0	0	0	0	0	0	0.9	0	0.9
CHGB	FSTL3	4445138	4432697	9606.ENSP00000368244	9606.ENSP00000166139	0	0	0	0	0	0	0.9	0.049	0.9
HLA-DPA1	IRF6	4447805	4442789	9606.ENSP00000393566	9606.ENSP00000355988	0	0	0	0	0.049	0	0.9	0	0.9
HLA-G	TRIM22	4448666	4445296	9606.ENSP00000412927	9606.ENSP00000369299	0	0	0	0	0	0	0.9	0	0.9
HIST1H2BK	SPI1	4441923	4433383	9606.ENSP00000349430	9606.ENSP00000227163	0	0	0	0	0	0	0.9	0	0.9
RAB37	SLC27A2	4446048	4435783	9606.ENSP00000376390	9606.ENSP00000267842	0	0	0	0	0	0	0.9	0	0.9
RNASET2	ACLY	4449364	4434323	9606.ENSP00000426455	9606.ENSP00000253792	0	0	0	0	0	0	0.9	0	0.9
ACLY	PYCARD	4434323	4434024	9606.ENSP00000253792	9606.ENSP00000247470	0	0	0	0	0	0	0.9	0	0.9
CHRDL1	LAMC1	4443870	4434618	9606.ENSP00000361112	9606.ENSP00000258341	0	0	0	0	0	0	0.9	0	0.9
LPAR5	C5	4439960	4433289	9606.ENSP00000327875	9606.ENSP00000223642	0	0	0	0	0	0	0.9	0	0.9
TRIM63	FBXO2	4444355	4441603	9606.ENSP00000363390	9606.ENSP00000346240	0	0	0	0	0	0	0.9	0	0.9
SUCNR1	CCL28	4442617	4442460	9606.ENSP00000355156	9606.ENSP00000354416	0	0	0	0	0	0	0.9	0	0.9
HLA-DPA1	SH3GL2	4447805	4445424	9606.ENSP00000393566	9606.ENSP00000369981	0	0	0	0	0	0	0.9	0	0.9
NMB	LPAR5	4446291	4439960	9606.ENSP00000378089	9606.ENSP00000327875	0	0	0	0	0	0	0.9	0	0.9
HLA-G	FCGR1B	4448666	4443305	9606.ENSP00000412927	9606.ENSP00000358391	0	0	0	0	0.05	0	0.9	0	0.9
HLA-E	IRF6	4444757	4442789	9606.ENSP00000365817	9606.ENSP00000355988	0	0	0	0	0	0	0.9	0.043	0.9
KNG1	LAMC1	4435537	4434618	9606.ENSP00000265023	9606.ENSP00000258341	0	0	0	0	0	0	0.9	0	0.9
GPC3	SCG2	4446259	4438023	9606.ENSP00000377836	9606.ENSP00000304133	0	0	0	0	0	0	0.9	0	0.9
PIGR	LPCAT1	4441870	4436543	9606.ENSP00000348888	9606.ENSP00000283415	0	0	0	0	0	0	0.9	0	0.9
ESRP1	APBB1IP	4448377	4444696	9606.ENSP00000405738	9606.ENSP00000365411	0	0	0	0	0	0	0.9	0	0.9
TRIM2	HLA-F	4440975	4434738	9606.ENSP00000339659	9606.ENSP00000259951	0	0	0	0	0	0	0.9	0	0.9
SCG2	TIMP1	4438023	4433052	9606.ENSP00000304133	9606.ENSP00000218388	0	0	0	0	0	0	0.9	0.041	0.9
TRIM2	HLA-DQA1	4440975	4440953	9606.ENSP00000339659	9606.ENSP00000339398	0	0	0	0	0	0	0.9	0	0.9
GBP2	TRIM2	4443541	4440975	9606.ENSP00000359497	9606.ENSP00000339659	0	0	0	0	0	0	0.9	0	0.9
GCGR	GPR4	4447027	4439307	9606.ENSP00000383558	9606.ENSP00000319744	0	0	0	0	0	0	0.9	0.043	0.9
APLN	CCL20	4447715	4442174	9606.ENSP00000391800	9606.ENSP00000351671	0	0	0	0	0	0	0.9	0.046	0.9
APOB	FSTL3	4433584	4432697	9606.ENSP00000233242	9606.ENSP00000166139	0	0	0	0	0	0	0.9	0	0.9
APLN	C5	4447715	4433289	9606.ENSP00000391800	9606.ENSP00000223642	0	0	0	0	0	0	0.9	0	0.9
GP2	NTNG1	4445540	4443452	9606.ENSP00000370767	9606.ENSP00000359085	0	0	0	0	0	0	0.9	0	0.9
IGFBP3	SCG2	4445494	4438023	9606.ENSP00000370473	9606.ENSP00000304133	0	0	0	0	0	0	0.9	0	0.9
FOLR3	ACAA1	4451565	4440473	9606.ENSP00000481114	9606.ENSP00000333664	0	0	0	0	0	0	0.9	0	0.9
HLA-DRA	SH3GL2	4446403	4445424	9606.ENSP00000378786	9606.ENSP00000369981	0	0	0	0	0	0	0.9	0	0.9
TNFRSF1B	SLC27A2	4444700	4435783	9606.ENSP00000365435	9606.ENSP00000267842	0	0	0	0	0	0	0.9	0	0.9
CCL28	C5	4442460	4433289	9606.ENSP00000354416	9606.ENSP00000223642	0	0	0	0	0	0	0.9	0.05	0.9
SH3GL2	CD74	4445424	4432583	9606.ENSP00000369981	9606.ENSP00000009530	0	0	0	0	0	0	0.9	0	0.9
CHRDL1	C3	4443870	4433951	9606.ENSP00000361112	9606.ENSP00000245907	0	0	0	0	0	0	0.9	0	0.9
TRIM63	KLHL3	4444355	4438782	9606.ENSP00000363390	9606.ENSP00000312397	0	0	0	0	0	0	0.9	0	0.9
SCG2	PROC	4438023	4433614	9606.ENSP00000304133	9606.ENSP00000234071	0	0	0	0	0	0	0.9	0	0.9
ADCY7	CXCL10	4446306	4438146	9606.ENSP00000378187	9606.ENSP00000305651	0	0	0	0	0	0	0.9	0	0.9
CD52	NTNG1	4444343	4443452	9606.ENSP00000363330	9606.ENSP00000359085	0	0	0	0	0	0	0.9	0	0.9
GBP5	TRIM2	4443538	4440975	9606.ENSP00000359488	9606.ENSP00000339659	0	0	0	0	0	0	0.9	0	0.9
CD53	SLC27A2	4435973	4435783	9606.ENSP00000271324	9606.ENSP00000267842	0	0	0	0	0	0	0.9	0	0.9
BDKRB2	CCL28	4450312	4442460	9606.ENSP00000450482	9606.ENSP00000354416	0	0	0	0	0	0	0.9	0	0.9
HIST1H2BK	SAP30	4441923	4437294	9606.ENSP00000349430	9606.ENSP00000296504	0	0	0	0	0	0	0.9	0	0.9
ACPP	LPCAT1	4439571	4436543	9606.ENSP00000323036	9606.ENSP00000283415	0	0	0	0	0	0	0.9	0	0.9
PSMB10	CCND1	4442129	4433391	9606.ENSP00000351314	9606.ENSP00000227507	0	0	0	0	0	0	0.9	0.042	0.9
SPTBN2	HLA-DMB	4449634	4448054	9606.ENSP00000432568	9606.ENSP00000398890	0	0	0	0	0	0	0.9	0	0.9
GPC3	LGALS1	4446259	4432889	9606.ENSP00000377836	9606.ENSP00000215909	0	0	0	0	0	0	0.9	0.049	0.9
CCL28	FPR3	4442460	4441189	9606.ENSP00000354416	9606.ENSP00000341821	0	0	0	0	0	0	0.9	0.046	0.9
CYFIP2	FCGR2A	4450126	4435978	9606.ENSP00000444645	9606.ENSP00000271450	0	0	0	0	0	0	0.9	0	0.9
HLA-DRA	IRF6	4446403	4442789	9606.ENSP00000378786	9606.ENSP00000355988	0	0	0	0	0.049	0	0.9	0	0.9
CHGB	PROC	4445138	4433614	9606.ENSP00000368244	9606.ENSP00000234071	0	0	0	0	0	0	0.9	0	0.9
TRIM2	ICAM1	4440975	4435501	9606.ENSP00000339659	9606.ENSP00000264832	0	0	0	0	0	0	0.9	0	0.9
HLA-B	IRF6	4448060	4442789	9606.ENSP00000399168	9606.ENSP00000355988	0	0	0	0	0	0	0.9	0.043	0.9
TRIM22	IRF6	4445296	4442789	9606.ENSP00000369299	9606.ENSP00000355988	0	0	0	0	0	0	0.9	0	0.9
KLHL13	FBXO2	4450072	4441603	9606.ENSP00000443191	9606.ENSP00000346240	0	0	0	0	0	0	0.9	0	0.9
QRFPR	KNG1	4446272	4435537	9606.ENSP00000377948	9606.ENSP00000265023	0	0	0	0	0	0	0.9	0	0.9
PROC	LGALS1	4433614	4432889	9606.ENSP00000234071	9606.ENSP00000215909	0	0	0	0	0	0	0.9	0	0.9
STC2	APOB	4435556	4433584	9606.ENSP00000265087	9606.ENSP00000233242	0	0	0	0	0	0	0.9	0.044	0.9
GBP1	IRF6	4443543	4442789	9606.ENSP00000359504	9606.ENSP00000355988	0	0	0	0	0	0	0.9	0.046	0.9
APLN	FPR3	4447715	4441189	9606.ENSP00000391800	9606.ENSP00000341821	0	0	0	0	0	0	0.9	0.047	0.9
SCG2	C3	4438023	4433951	9606.ENSP00000304133	9606.ENSP00000245907	0	0	0	0	0	0	0.9	0	0.9
RNASET2	FABP5	4449364	4437379	9606.ENSP00000426455	9606.ENSP00000297258	0	0	0	0	0	0	0.9	0	0.9
HLA-E	TRIM2	4444757	4440975	9606.ENSP00000365817	9606.ENSP00000339659	0	0	0	0	0	0	0.9	0	0.9
HLA-DQB1	PAG1	4444478	4433123	9606.ENSP00000364080	9606.ENSP00000220597	0	0	0	0	0	0	0.9	0	0.9
SPTBN2	HLA-DPB1	4449634	4448476	9606.ENSP00000432568	9606.ENSP00000408146	0	0	0	0	0	0	0.9	0.041	0.9
GGH	DOCK2	4434748	4434518	9606.ENSP00000260118	9606.ENSP00000256935	0	0	0	0	0	0	0.9	0	0.9
FCER1G	SLC2A3	4436828	4432652	9606.ENSP00000289902	9606.ENSP00000075120	0	0	0	0	0	0	0.9	0	0.9
SPTBN2	HLA-DQA1	4449634	4440953	9606.ENSP00000432568	9606.ENSP00000339398	0	0	0	0	0	0	0.9	0	0.9
GGH	C3	4434748	4433951	9606.ENSP00000260118	9606.ENSP00000245907	0	0	0	0	0	0	0.9	0	0.9
STC2	PROC	4435556	4433614	9606.ENSP00000265087	9606.ENSP00000234071	0	0	0	0	0	0	0.9	0	0.9
GPC3	CHGB	4446259	4445138	9606.ENSP00000377836	9606.ENSP00000368244	0	0	0	0	0	0	0.9	0	0.9
PLAU	SLC27A2	4444017	4435783	9606.ENSP00000361850	9606.ENSP00000267842	0	0	0	0	0	0	0.9	0	0.9
LPAR5	CXCL10	4439960	4438146	9606.ENSP00000327875	9606.ENSP00000305651	0	0	0	0	0	0	0.9	0	0.9
SH3GL2	CD3D	4445424	4437689	9606.ENSP00000369981	9606.ENSP00000300692	0	0	0	0	0	0	0.9	0	0.9
HLA-DPB1	AP1M2	4448476	4434125	9606.ENSP00000408146	9606.ENSP00000250244	0	0	0	0	0	0	0.9	0	0.9
CASR	CXCL9	4449096	4442567	9606.ENSP00000420194	9606.ENSP00000354901	0	0	0	0	0	0	0.9	0	0.9
PBX1	HIST1H2BK	4448380	4441923	9606.ENSP00000405890	9606.ENSP00000349430	0	0	0	0	0	0	0.9	0	0.9
GBP5	IRF6	4443538	4442789	9606.ENSP00000359488	9606.ENSP00000355988	0	0	0	0	0	0	0.9	0	0.9
BDKRB2	QRFPR	4450312	4446272	9606.ENSP00000450482	9606.ENSP00000377948	0	0	0	0.611	0	0	0.9	0	0.9
BDKRB2	CXCL9	4450312	4442567	9606.ENSP00000450482	9606.ENSP00000354901	0	0	0	0	0	0	0.9	0.047	0.9
FBXO2	KLHL3	4441603	4438782	9606.ENSP00000346240	9606.ENSP00000312397	0	0	0	0	0	0	0.9	0	0.9
BDKRB2	GCGR	4450312	4447027	9606.ENSP00000450482	9606.ENSP00000383558	0	0	0	0	0	0	0.9	0	0.9
CD36	RAB37	4448068	4446048	9606.ENSP00000399421	9606.ENSP00000376390	0	0	0	0	0	0	0.9	0.043	0.9
CHGB	LGALS1	4445138	4432889	9606.ENSP00000368244	9606.ENSP00000215909	0	0	0	0	0	0	0.9	0	0.9
LYZ	ACLY	4434847	4434323	9606.ENSP00000261267	9606.ENSP00000253792	0	0	0	0	0	0	0.9	0	0.9
CHGB	TIMP1	4445138	4433052	9606.ENSP00000368244	9606.ENSP00000218388	0	0	0	0	0	0	0.9	0	0.9
NMB	PTGER1	4446291	4436972	9606.ENSP00000378089	9606.ENSP00000292513	0	0	0	0	0	0	0.9	0	0.9
GPR4	PTGER1	4439307	4436972	9606.ENSP00000319744	9606.ENSP00000292513	0	0	0	0	0	0	0.9	0	0.9
BDKRB2	FPR3	4450312	4441189	9606.ENSP00000450482	9606.ENSP00000341821	0	0	0	0.661	0	0	0.9	0.059	0.9
TNFRSF1B	SLC2A3	4444700	4432652	9606.ENSP00000365435	9606.ENSP00000075120	0	0	0	0	0	0	0.9	0.045	0.9
HLA-DQB2	ICAM1	4447655	4435501	9606.ENSP00000390431	9606.ENSP00000264832	0	0	0	0	0	0	0.9	0	0.9
CCL20	LPAR5	4442174	4439960	9606.ENSP00000351671	9606.ENSP00000327875	0	0	0	0	0	0	0.9	0	0.9
BDKRB2	GPR4	4450312	4439307	9606.ENSP00000450482	9606.ENSP00000319744	0	0	0	0.67	0	0	0.9	0	0.9
CHRDL1	SCG2	4443870	4438023	9606.ENSP00000361112	9606.ENSP00000304133	0	0	0	0	0	0	0.9	0	0.9
STC2	KNG1	4435556	4435537	9606.ENSP00000265087	9606.ENSP00000265023	0	0	0	0	0	0	0.9	0.041	0.9
HLA-DQB2	PAG1	4447655	4433123	9606.ENSP00000390431	9606.ENSP00000220597	0	0	0	0	0	0	0.9	0.041	0.9
GBP2	IRF6	4443541	4442789	9606.ENSP00000359497	9606.ENSP00000355988	0	0	0	0	0	0	0.9	0	0.9
ADORA3	CCL28	4443373	4442460	9606.ENSP00000358730	9606.ENSP00000354416	0	0	0	0	0	0	0.9	0	0.9
LPAR5	KISS1R	4439960	4433626	9606.ENSP00000327875	9606.ENSP00000234371	0	0	0	0.615	0	0	0.9	0.061	0.9
FABP5	PYCARD	4437379	4434024	9606.ENSP00000297258	9606.ENSP00000247470	0	0	0	0	0	0	0.9	0	0.9
RAB37	PIGR	4446048	4441870	9606.ENSP00000376390	9606.ENSP00000348888	0	0	0	0	0	0	0.9	0	0.9
CHRDL1	APOB	4443870	4433584	9606.ENSP00000361112	9606.ENSP00000233242	0	0	0	0	0	0	0.9	0	0.9
HLA-DQB2	AP1M2	4447655	4434125	9606.ENSP00000390431	9606.ENSP00000250244	0	0	0	0	0	0	0.9	0	0.9
BDKRB2	SUCNR1	4450312	4442617	9606.ENSP00000450482	9606.ENSP00000355156	0	0	0	0.67	0	0	0.9	0	0.9
STC2	CP	4435556	4435459	9606.ENSP00000265087	9606.ENSP00000264613	0	0	0	0	0	0	0.9	0	0.9
GGH	TNFAIP6	4434748	4433852	9606.ENSP00000260118	9606.ENSP00000243347	0	0	0	0	0	0	0.9	0	0.9
LYPD6B	XPNPEP2	4447466	4443668	9606.ENSP00000387077	9606.ENSP00000360147	0	0	0	0	0	0	0.9	0	0.9
GP2	CD52	4445540	4444343	9606.ENSP00000370767	9606.ENSP00000363330	0	0	0	0	0	0	0.9	0	0.9
LYPD6B	GP2	4447466	4445540	9606.ENSP00000387077	9606.ENSP00000370767	0	0	0	0	0	0	0.9	0	0.9
HLA-DPB1	SH3GL2	4448476	4445424	9606.ENSP00000408146	9606.ENSP00000369981	0	0	0	0	0	0	0.9	0	0.9
HLA-DQB1	AP1M2	4444478	4434125	9606.ENSP00000364080	9606.ENSP00000250244	0	0	0	0	0	0	0.9	0	0.9
XPNPEP2	NTNG1	4443668	4443452	9606.ENSP00000360147	9606.ENSP00000359085	0	0	0	0	0	0	0.9	0	0.9
ASB9	FBXO2	4445400	4441603	9606.ENSP00000369855	9606.ENSP00000346240	0	0	0	0	0	0	0.9	0	0.9
HLA-G	IRF6	4448666	4442789	9606.ENSP00000412927	9606.ENSP00000355988	0	0	0	0	0	0	0.9	0.043	0.9
SH3GL2	APOB	4445424	4433584	9606.ENSP00000369981	9606.ENSP00000233242	0	0	0	0	0	0	0.9	0.05	0.9
CP	LAMC1	4435459	4434618	9606.ENSP00000264613	9606.ENSP00000258341	0	0	0	0	0	0	0.9	0	0.9
PLAU	FCER1G	4444017	4436828	9606.ENSP00000361850	9606.ENSP00000289902	0	0	0	0	0	0	0.9	0	0.9
IL4I1	BCKDHB	4451032	4439197	9606.ENSP00000472474	9606.ENSP00000318351	0	0	0	0	0.05	0	0.9	0	0.9
ESRP1	VWF	4448377	4434871	9606.ENSP00000405738	9606.ENSP00000261405	0	0	0	0	0	0	0.9	0	0.9
ITGAL	SLC2A3	4441903	4432652	9606.ENSP00000349252	9606.ENSP00000075120	0	0	0	0	0.048	0	0.9	0	0.9
FCGR1B	TRIM2	4443305	4440975	9606.ENSP00000358391	9606.ENSP00000339659	0	0	0	0	0	0	0.9	0	0.9
SCG2	APOB	4438023	4433584	9606.ENSP00000304133	9606.ENSP00000233242	0	0	0	0	0	0	0.9	0	0.9
FOLR3	ALDOC	4451565	4433361	9606.ENSP00000481114	9606.ENSP00000226253	0	0	0	0	0	0	0.9	0	0.9
ACAA1	LYZ	4440473	4434847	9606.ENSP00000333664	9606.ENSP00000261267	0	0	0	0	0	0	0.9	0	0.9
CHGB	STC2	4445138	4435556	9606.ENSP00000368244	9606.ENSP00000265087	0	0	0	0	0	0	0.9	0	0.9
SCG2	CP	4438023	4435459	9606.ENSP00000304133	9606.ENSP00000264613	0	0	0	0	0	0	0.9	0	0.9
APLN	C3	4447715	4433951	9606.ENSP00000391800	9606.ENSP00000245907	0	0	0	0	0	0	0.9	0	0.9
ACAA1	DOCK2	4440473	4434518	9606.ENSP00000333664	9606.ENSP00000256935	0	0	0	0	0	0	0.9	0	0.9
CYBB	SLC27A2	4445083	4435783	9606.ENSP00000367851	9606.ENSP00000267842	0	0	0	0	0	0	0.9	0.05	0.9
QRFPR	PTGER1	4446272	4436972	9606.ENSP00000377948	9606.ENSP00000292513	0	0	0	0	0	0	0.9	0	0.9
GCGR	LPAR5	4447027	4439960	9606.ENSP00000383558	9606.ENSP00000327875	0	0	0	0	0	0	0.9	0.049	0.9
SCNN1A	SCN4B	4442340	4439529	9606.ENSP00000353292	9606.ENSP00000322460	0	0	0	0	0	0	0.9	0	0.9
CHRDL1	VCAN	4443870	4435552	9606.ENSP00000361112	9606.ENSP00000265077	0	0	0	0	0	0	0.9	0.047	0.9
